# Supplementary material for: Copper-mediated trifluoromethylation of aryl-, heteroaryl-, and vinyltrifluoroborates with Langlois' reagent
Source: Royal Society of Chemistry journal article supplement (doi:10.1039/c3ra46837b), 2013-12-23

## Supporting Information

### Copper-Mediated Trifluoromethylation of Aryl-, Heteroaryl-, and Vinyltrifluoroborates with Langlois' Reagent

By  
Srinivas Reddy Dubbaka\*, Manohar Salla, Raghu Bolisetti, and Shashidhar  
Nizalapur

Department of Medicinal Chemistry, Albany Molecular Research Singapore Research  
Centre, Pte. Ltd., 61 Science Park Road, #05-01, Galen, Science Park II,  
Singapore-117525

#### TABLE OF CONTENTS

|       |                                                                                                                                                                         |            |
|-------|-------------------------------------------------------------------------------------------------------------------------------------------------------------------------|------------|
| I.    | General information.....                                                                                                                                                | S2         |
| II.   | Reagents' commercial source information table.....                                                                                                                      | S2         |
| III.  | Base, solvent, copper salts and radical initiators screen for Cu-Mediated for<br>Trifluoromethylation of phenyltrifluoroborate with NaSO <sub>2</sub> CF <sub>3</sub> . | S3 – S6    |
| IV.   | General procedures for the synthesis of Aryl-CF <sub>3</sub> compounds.....                                                                                             | S7 – S7    |
| V.    | Spectral data of Aryl-CF <sub>3</sub> compounds.....                                                                                                                    | S7 - S14   |
| VI.   | General procedure for the synthesis of potassium<br>alkenyltrifluoroborates.....                                                                                        | S14        |
| VII.  | Spectral data of alkenyltrifluoroborates.....                                                                                                                           | S14 - S15  |
| VIII. | General procedure for the synthesis of alkenyl-CF <sub>3</sub> compounds.....                                                                                           | S16        |
| IX.   | Spectral data of alkenyl-CF <sub>3</sub> compounds.....                                                                                                                 | S16 - S19  |
| X.    | References.....                                                                                                                                                         | S20        |
| XI.   | <sup>1</sup> H-NMR, <sup>19</sup> F NMR, <sup>13</sup> C NMR and GC-MS spectra.....                                                                                     | S21 - S129 |

## EXPERIMENTAL

**General information:**  $^1\text{H}$  NMR Spectra,  $^{19}\text{F}$  NMR and  $^{13}\text{C}$  NMR were recorded on Bruker 400 MHz or 300 MHz in the solvents indicated; chemical shifts are reported in units (ppm) by assigning  $\text{CDCl}_3$  resonance in the  $^1\text{H}$  spectrum as 7.26 ppm and  $\text{CDCl}_3$  resonance in the  $^{13}\text{C}$  spectrum as 77.0 ppm.  $^{19}\text{F}$  NMR chemical shifts were determined relative to  $\text{CFCl}_3$  as internal standard and are measured proton decoupled. All coupling constants ( $J$  values) were reported in Hertz (Hz). GC-MS spectra were measured on Shimadzu. Column chromatography was performed on silica gel 200-300 mesh on Combiflash. If not specially mentioned, all the solvents and reagents were used as purchased and without further purification.

**Reagents' commercial sources:** Reactants (boronic acids or trifluoroborates) were purchased from Combi-Blocks, Tokyo chemical industry (TCI) Japan, Frontier Scientific and Aldrich and used without purification. Commercial sources for other relevant reagents are shown below.

| Chemical name                                          | Commercial source             | CAS no    | Product no |
|--------------------------------------------------------|-------------------------------|-----------|------------|
| Copper (I) chloride                                    | Aldrich                       | 7758-89-6 | 61168      |
| $\text{NaSO}_2\text{CF}_3$<br>(Langlois Reagent)       | Tokyo chemical industry (TCI) | 2926-29-6 | T2033      |
| <i>tert</i> -Butyl Hydroperoxide (TBHP) (70% in Water) | Tokyo chemical industry (TCI) | 75-91-2   | B3153      |

### Experimental Details:

#### Base and solvent screen for Cu-Mediated for Trifluoromethylation of phenyltrifluoroborate (PhBF<sub>3</sub>K, **1a**) with NaSO<sub>2</sub>CF<sub>3</sub>/TBHP.

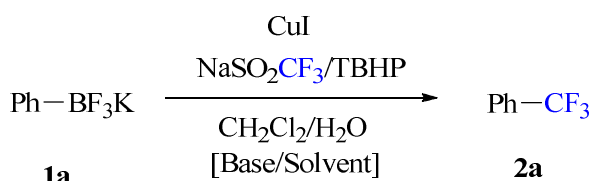

A mixture of the PhBF<sub>3</sub>K (27.6 mg, 0.15 mmol, 1.0 equiv), CuI (28.6 mg, 0.15 mmol, 1.0 equiv), NaSO<sub>2</sub>CF<sub>3</sub> (70.2 mg, 0.45 mmol, 3.0 equiv), Base (0.15 mmol, 3.0 equiv) in CH<sub>2</sub>Cl<sub>2</sub> (0.7 mL), and H<sub>2</sub>O (0.5 mL) was cooled to 0 °C, and TBHP (70% solution in water) (104 μL, 5.0 equiv, 0.75 mmol) was added under vigorous stirring. Stirring was continued for overnight at room temperature. To this, 4-fluorobenzonitrile (0.15 mmol) was added as reference to the reaction mixture, stirred for 5 min, an aliquot of the organic phase was withdrawn for the <sup>19</sup>F NMR measurement in CDCl<sub>3</sub>. The yields of **2a** as a function of bases and solvents are listed in **Table S1**.

**Table S1.** Base and solvent screen for Cu-Mediated for Trifluoromethylation of phenyltrifluoroborate (**1a**) with NaSO<sub>2</sub>CF<sub>3</sub>/TBHP.

| Entry          | Bases                                            | %Yield         |
|----------------|--------------------------------------------------|----------------|
| 1              | Et <sub>3</sub> N                                | traces         |
| 2              | Na <sub>2</sub> CO <sub>3</sub>                  | 15             |
| 3 <sup>c</sup> | Cs <sub>2</sub> CO <sub>3</sub>                  | 20             |
| 4              | NaHCO <sub>3</sub>                               | 50             |
| 5              | NaOAc                                            | 28             |
| 6              | K <sub>3</sub> PO <sub>4</sub>                   | 31             |
| 7              | NaHCO <sub>3</sub>                               | 5 <sup>a</sup> |
| 8              | NaHCO <sub>3</sub> /MeOH (0.7 mL)                | 51             |
| 9              | NaHCO <sub>3</sub> /1,4-Dioxane (0.7 mL)         | 45             |
| 10             | NaHCO <sub>3</sub> /1,2-dimethoxyethane (0.7 mL) | 45             |

<sup>a</sup> reaction carried out without H<sub>2</sub>O and TBHP (5.5 M in decane )

**Copper salt screen for Cu-Mediated for Trifluoromethylation of PhBF<sub>3</sub>K (1a)  
with NaSO<sub>2</sub>CF<sub>3</sub>/TBHP.**

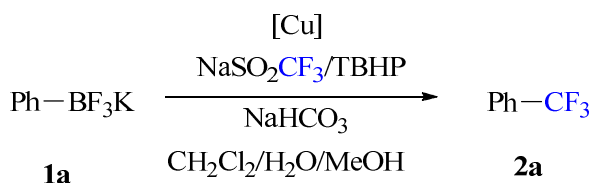

A mixture of the PhBF<sub>3</sub>K (27.6 mg, 0.15 mmol, 1.0 equiv), Cu salt (0.15 mmol, 1.0 equiv), NaSO<sub>2</sub>CF<sub>3</sub> (70.2 mg, 0.45 mmol, 3.0 equiv), NaHCO<sub>3</sub> (12.6 mg, 0.15 mmol, 3.0 equiv) in CH<sub>2</sub>Cl<sub>2</sub> (0.7 mL), MeOH (0.7 mL), and H<sub>2</sub>O (0.5 mL) was cooled to 0 °C, and TBHP (70% solution in water) (104 μL, 5.0 equiv, 0.75 mmol) was added under vigorous stirring. Stirring was continued for overnight at room temperature. To this, 4-fluorobenzonitrile (0.15 mmol) was added as reference to the reaction mixture, stirred for 5 min, an aliquot of the organic phase was withdrawn for the <sup>19</sup>F NMR measurement in CDCl<sub>3</sub>. The yields of **2a** as a function of copper salts are listed in **Table S2**.

**Table S2.** Copper salt screen for Cu-Mediated for Trifluoromethylation of phenyltrifluoroborate (**1a**) with NaSO<sub>2</sub>CF<sub>3</sub>/TBHP.

| Entry          | Cu Salts                                            | %Yield                             |
|----------------|-----------------------------------------------------|------------------------------------|
| 1              | Cu(I) acetate                                       | 10                                 |
| 2              | Cu(II) acetate                                      | traces                             |
| 3              | Cu(OCOFCF <sub>3</sub> )                            | 40                                 |
| 4              | Cu(OCOFCF <sub>3</sub> ) <sub>2</sub>               | 20                                 |
| 5 <sup>a</sup> | Cu(OSO <sub>2</sub> CF <sub>3</sub> )               | 50                                 |
| 6              | Cu(OSO <sub>2</sub> CF <sub>3</sub> ) <sub>2</sub>  | 20                                 |
| 7              | (CH <sub>3</sub> CN) <sub>4</sub> CuPF <sub>6</sub> | traces                             |
| 8              | CuBr                                                | 10                                 |
| 9 <sup>b</sup> | CuTc                                                | 50                                 |
| 10             | CuCl                                                | 80                                 |
| 11             | CuCl/1,10-Phen                                      | (8) <sup>c</sup> (15) <sup>d</sup> |
| 12             | catalytic                                           | (8) <sup>e</sup>                   |

<sup>a</sup>Used as benzene complex. <sup>d</sup>Copper(I)-thiophene-2-carboxylate; <sup>c</sup>20% CuCl; <sup>d</sup>20% CuCl and 20% 1,10-phenanthroline. <sup>e</sup>**1a** (1.0 equiv., 0.15 mmol), Cu(OAc)<sub>2</sub> (0.2 equiv.), imidazole (0.2 equiv.), 2,4,6-collidine (2.0 equiv.), NH<sub>4</sub>Cl (2.5 equiv.), NaSO<sub>2</sub>CF<sub>3</sub> (7.0 equiv.), TBHP (70% in H<sub>2</sub>O, 16.0 equiv.), CH<sub>2</sub>Cl<sub>2</sub>/H<sub>2</sub>O, air, rt, 15 h.

### Radical initiators screen for Cu-Mediated for Trifluoromethylation of PhBF<sub>3</sub>K (1a) with NaSO<sub>2</sub>CF<sub>3</sub>.

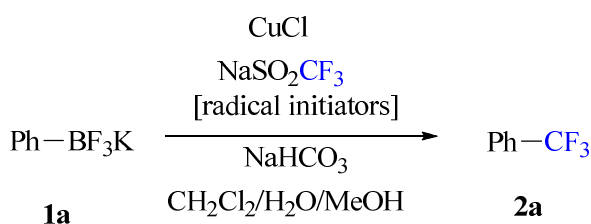

A mixture of the PhBF<sub>3</sub>K (27.6 mg, 0.15 mmol, 1.0 equiv), CuCl (14.8 mg, 0.15 mmol, 1.0 equiv), NaSO<sub>2</sub>CF<sub>3</sub> (70.2 mg, 0.45 mmol, 3.0 equiv), NaHCO<sub>3</sub> (12.6 mg, 0.15 mmol, 3.0 equiv) in CH<sub>2</sub>Cl<sub>2</sub> (0.7 mL), MeOH (0.7 mL), and H<sub>2</sub>O (0.5 mL) was cooled to 0 °C, and radical initiators (5.0 equiv, 0.75 mmol) was added under vigorous stirring. Stirring was continued for overnight at room temperature. To this, 4-fluorobenzonitrile (0.15 mmol) was added as reference to the reaction mixture, stirred for 5 min, an aliquot of the organic phase was withdrawn for the <sup>19</sup>F NMR measurement in CDCl<sub>3</sub>. The yields of **2a** as a function of radical initiators are listed in **Table S3**.

**Table S3.** Radical initiators screen for Cu-Mediated for Trifluoromethylation of phenyltrifluoroborate (**1a**) with NaSO<sub>2</sub>CF<sub>3</sub>.

| Entry | Radical initiators            | %Yield |
|-------|-------------------------------|--------|
| 1     | H <sub>2</sub> O <sub>2</sub> | 0      |
| 2     | NaOCl                         | traces |
| 3     | O <sub>2</sub>                | 8      |
| 4     | DDQ                           | 0      |
| 5     | PhI(OAc) <sub>2</sub>         | traces |
| 6     | BzOOBz                        | 20     |

### General procedure for the Synthesis of Aryl-CF<sub>3</sub> compounds: (Table 2).

A mixture of the trifluoroborate (0.25 mmol, 1.0 equiv), CuCl (24.8 mg, 0.25 mmol, 1.0 equiv), NaSO<sub>2</sub>CF<sub>3</sub> (117 mg, 0.75 mmol, 3.0 equiv), NaHCO<sub>3</sub> (21.0 mg, 0.25 mmol, 3.0 equiv) in CH<sub>2</sub>Cl<sub>2</sub> (1.5 mL), MeOH (1.5 mL), and H<sub>2</sub>O (1.2 mL) was cooled to 0 °C, and TBHP (70% solution in water) (172 μL, 5.0 equiv, 1.25 mmol, (86 μL, 2.5 equiv, 0.625 mmol for **2i**, and 138 μL, 4.0 equiv, 1.0 mmol for **2j**)) was added under vigorous stirring. Stirring was continued for 6–12h at room temperature.

For the compounds reported as isolated yields (**2b**, **2n**, and **2r**), the organic phase was separated, the aqueous phase was extracted with CH<sub>2</sub>Cl<sub>2</sub> (3 x 10 mL). The combined organic phases were dried over anhydrous Na<sub>2</sub>SO<sub>4</sub>, the solvent was removed at 1 atm and the residue was purified by column chromatography on Combiflash with hexanes to afford the desired compounds.

The volatile products were not isolated and their yields were determined only by <sup>19</sup>F NMR of the reaction mixture. For the compounds reported with <sup>19</sup>F NMR yields, 4-fluorobenzonitrile (0.25 mmol) was added as reference to the reaction mixture, stirred for 5 min, an aliquot of the organic phase was withdrawn for the <sup>19</sup>F NMR measurement in CDCl<sub>3</sub>.

### Spectral data of Aryl-CF<sub>3</sub> compounds (Table 2):

#### 1-(Trifluoromethyl)benzene (**2a**):

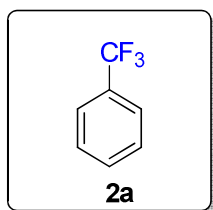

The yield (80%) of **2a** was determined by <sup>19</sup>F NMR. The <sup>19</sup>F NMR spectral data for **2a** matched that of an authentic sample (Aldrich, s, -62.3 ppm).

<sup>19</sup>F NMR (CDCl<sub>3</sub>, 376 M Hz): δ -62.75 (s, 3F); GC-MS *m/z*, 146 (M<sup>+</sup>).

#### 1-(Trifluoromethyl)naphthalene (**2b**):<sup>1</sup>

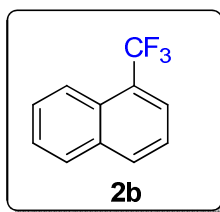

Compound **2b** was isolated in 60% yield (49 mg) and 82% yield was determined by  $^{19}\text{F}$  NMR.

$^1\text{H}$  NMR ( $\text{CDCl}_3$ , 400 MHz):  $\delta$  8.18 (d,  $J = 8.6$  Hz, 1H), 8.0 (d,  $J = 8.2$  Hz, 1H), 7.92 (d,  $J = 8.0$  Hz, 1H); 7.86 (d,  $J = 7.3$  Hz, 1H), 7.55-7.65 (m, 2H), 7.50 (t,  $J = 7.7$  Hz, 1H);  $^{13}\text{C}$  NMR ( $\text{CDCl}_3$ , 75 MHz):  $\delta$  133.9 (s, 1C), 132.7 (s, 1C), 129.0 (s, 1C), 128.7 (s, 1C), 127.6 (s, 1C), 127.4 (q,  $J = 269.8$  Hz, 1C), 126.6 (s, 1C), 124.6 (q,  $J = 6.2$  Hz, 1C), 124.2 ( $J = 2.2$  Hz, 1C), 124.1 (s, 1C), 123.3 (s, 1C).

$^{19}\text{F}$  NMR ( $\text{CDCl}_3$ , 282 M Hz):  $\delta$  -60.43 (s, 3F); GC-MS  $m/z$ , 196 ( $\text{M}^+$ ).

### 2-(Trifluoromethyl)naphthalene (**2c**):<sup>2</sup>

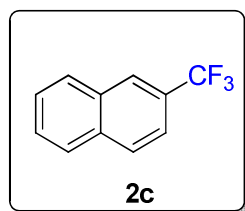

The yield (59%) of **2c** was determined by  $^{19}\text{F}$  NMR.

$^{19}\text{F}$  NMR ( $\text{CDCl}_3$ , 282 M Hz):  $\delta$  -62.86 (s, 3F); GC-MS  $m/z$ , 196 ( $\text{M}^+$ ).

### 1-Methoxy-4-(trifluoromethyl)benzene (**2d**):<sup>3</sup>

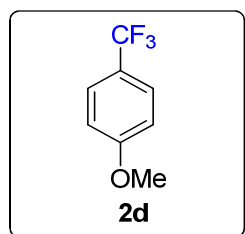

The yield (74%) of **2d** was determined by  $^{19}\text{F}$  NMR.

$^{19}\text{F}$  NMR ( $\text{CDCl}_3$ , 282 M Hz):  $\delta$  -62.20 (s, 3F); GC-MS  $m/z$ , 176 ( $\text{M}^+$ ).



### 1-Methyl-4-(trifluoromethyl)benzene (**2e**):<sup>4</sup>

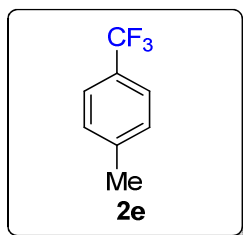

The yield (79%) of **2e** was determined by <sup>19</sup>F NMR.  
<sup>19</sup>F NMR (CDCl<sub>3</sub>, 282 M Hz): δ -62.98 (s, 3F); GC-MS *m/z*, 160 (M<sup>+</sup>).

### 1-(*Tert*-Butyl)-4-(trifluoromethyl)benzene (**2f**):<sup>2,4</sup>

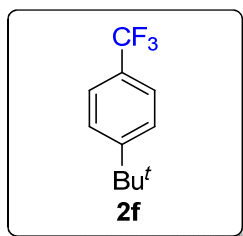

The yield (77%) of **2f** was determined by <sup>19</sup>F NMR.  
<sup>19</sup>F NMR (CDCl<sub>3</sub>, 282 M Hz): δ -62.98 (s, 3F); GC-MS *m/z*, 202 (M<sup>+</sup>).

### 1-Methoxy-3-(trifluoromethyl)benzene (**2g**):<sup>3,4</sup>

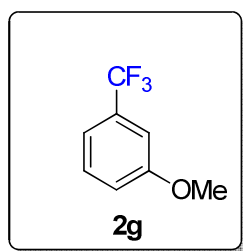

Compound **2g** was isolated in 56% yield (25.0 mg) and 60% yield was determined by <sup>19</sup>F NMR.

<sup>1</sup>H NMR (CDCl<sub>3</sub>, 400 MHz): δ 7.39 (d, *J* = 8.0 Hz, 1H), 7.21 (dt, *J* = 7.6 Hz, *J* = 0.9 Hz, 1H), 7.12 (br.s, 1H); 7.07 (dd, *J* = 8.0 Hz, *J* = 0.9 Hz, 1H); <sup>19</sup>F NMR (CDCl<sub>3</sub>, 282 M Hz): δ -63.34 (s, 3F); GC-MS *m/z*, 176 (M<sup>+</sup>).

**1-Methyl-3-(trifluoromethyl)benzene (2h):**<sup>3,4</sup>

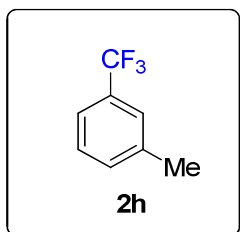

The yield (51%) of **2h** was determined by <sup>19</sup>F NMR.  
<sup>19</sup>F NMR (CDCl<sub>3</sub>, 282 M Hz): δ -63.25 (s, 3 F); GC-MS *m/z*, 160 (M<sup>+</sup>).

**4-(trifluoromethyl)benzonitril (2i):**<sup>5</sup>

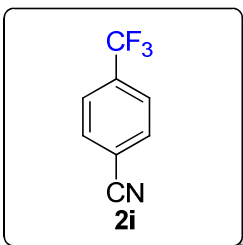

The yield (40%) of **2i** was determined by <sup>19</sup>F NMR.  
<sup>19</sup>F NMR (CDCl<sub>3</sub>, 282 M Hz): δ -64.17 (s, 3F); GC-MS *m/z*, 171 (M<sup>+</sup>).

**Methyl 4-(trifluoromethyl)benzoate (2j):**<sup>5</sup>

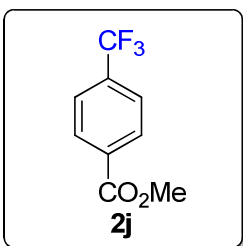

The yield (41%) of **2j** was determined by <sup>19</sup>F NMR.  
<sup>19</sup>F NMR (CDCl<sub>3</sub>, 282 M Hz): δ -63.79 (s, 3F); GC-MS *m/z*, 204 (M<sup>+</sup>).

**1,4-Bis(trifluoromethyl)benzene (2k):**<sup>5</sup>

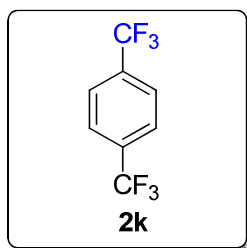

Traces product of **2k** was determined by GC-MS.

### 1-Chloro-4-(trifluoromethyl)benzene (**2l**):<sup>5</sup>

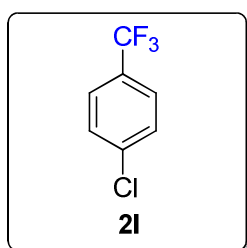

The yield (45%) of **2l** was determined by <sup>19</sup>F NMR.  
<sup>19</sup>F NMR (CDCl<sub>3</sub>, 282 M Hz): δ -63.18 (s, 3F); GC-MS *m/z*, 180 (M<sup>+</sup>).

### 1-Bromo-4-(trifluoromethyl)benzene (**2m**):<sup>5</sup>

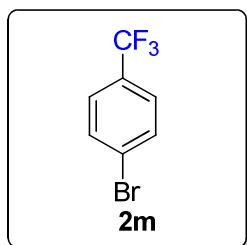

The yield (57%) of **2m** was determined by <sup>19</sup>F NMR.  
<sup>19</sup>F NMR (CDCl<sub>3</sub>, 282 M Hz): δ -63.48 (s, 3F); GC-MS *m/z*, 224 (M<sup>+</sup>).

### 1-Methoxy-2-(trifluoromethyl)benzene (**2n**):<sup>5</sup>

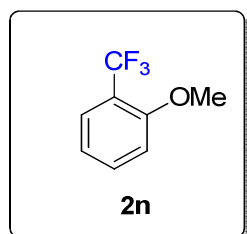

Compound **2n** was isolated in 65% yield (29 mg) and 89% yield was determined by <sup>19</sup>F NMR.

<sup>1</sup>H NMR (CDCl<sub>3</sub>, 400 MHz): δ 7.56 (d, 1H, *J* = 7.8 Hz), 7.49 (t, 1H, *J* = 7.8 Hz), 7.05-6.95 (m, 3H), 3.90 (s, 3H); <sup>13</sup>CNMR (CDCl<sub>3</sub>, 100 MHz): δ 157.5 (s, 1C), δ

133.2 (s, 1C), 127.1 (q,  $J = 5.2$  Hz, 1C), 123.5 (q,  $J = 277.1$  Hz, 1C), 120.0 (s, 1C), 118.7 (q,  $J = 30.1$  Hz, 1C), 111.9 (s, 1C), 55.9 (s, 1C);  $^{19}\text{F}$  NMR ( $\text{CDCl}_3$ , 282 MHz):  $\delta -63.05$  (s, 3F); GC-MS  $m/z$ , 176 ( $\text{M}^+$ ).

### 1-Methyl-2-(trifluoromethyl)benzene (**2o**):<sup>5</sup>

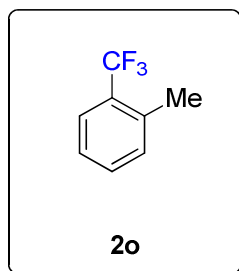

The yield (55%) of **2o** was determined by  $^{19}\text{F}$  NMR.  
 $^{19}\text{F}$  NMR ( $\text{CDCl}_3$ , 282 M Hz):  $\delta -63.21$  (s, 3 F); GC-MS  $m/z$ , 160 ( $\text{M}^+$ ).

### 2-Methoxy-3-(trifluoromethyl)pyridine (**2p**):<sup>2</sup>

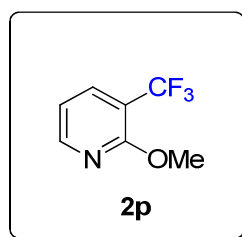

The yield (85%) of **2p** was determined by  $^{19}\text{F}$  NMR.  
 $^{19}\text{F}$  NMR ( $\text{CDCl}_3$ , 282 M Hz):  $\delta -64.47$  (s, 3F); GC-MS  $m/z$ , 177 ( $\text{M}^+$ ).

### *Tert*-Butyl-2-(trifluoromethyl)-1*H*-indole-1-carboxylate (**2q**):<sup>2</sup>

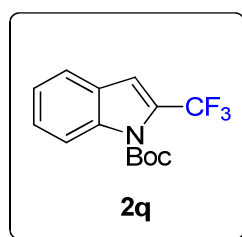

Compound **2r** was isolated in 53% yield (37.8 mg) and 55% yield was determined by  $^{19}\text{F}$  NMR.

$^1\text{H}$  NMR ( $\text{CDCl}_3$ , 400 MHz):  $\delta$  8.29 (dd,  $J = 8.4$  Hz,  $J = 0.8$  Hz, 1H), 7.62 (d,  $J = 7.8$  Hz, 1H), 7.45 (td,  $J = 7.8$  Hz,  $J = 1.2$  Hz, 1H), 7.29 (td,  $J = 7.1$  Hz,  $J = 1.1$  Hz, 1H); 7.14 (br.s), 1.67 (s, 3H);  $^{19}\text{F}$  NMR ( $\text{CDCl}_3$ , 376 M Hz):  $\delta -58.29$  (s, 3F); GC-MS  $m/z$ , 185 ( $\text{M-Boc}$ ).

### 2-(Trifluoromethyl)benzofuran (2r):<sup>2</sup>

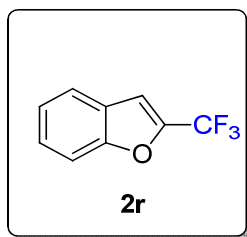

Compound **2r** was isolated in 75% yield (34.8 mg) and 91% yield was determined by <sup>19</sup>F NMR.

<sup>1</sup>H NMR (CDCl<sub>3</sub>, 300 MHz): δ 7.66 (d, *J* = 8.05 Hz, 1H), 7.56 (dq, *J* = 8.4 Hz, *J* = 0.9 Hz, 1H), 7.44 (td, *J* = 8.4 Hz, *J* = 1.2 Hz, 1H); 7.32 (td, *J* = 8.4 Hz, *J* = 0.9 Hz, 1H), 7.17-7.13 (m, 1H); <sup>13</sup>CNMR (CDCl<sub>3</sub>, 100 MHz): δ 155.2 (s, 1C), δ 143.5 (q, *J* = 48.5 Hz, 1C), 126.9 (s, 1C), 126.9 (s, 1C), 126.0 (s, 1C), 124.2 (s, 1C), 122.5 (s, 1C), 119.4 (q, *J* = 268.2 Hz, 1C), 112.1 (s, 1C), 108.1 (q, *J* = 2.9 Hz, 1C).

<sup>19</sup>F NMR (CDCl<sub>3</sub>, 282 MHz): δ -66.09 (s, 3 F); GC-MS *m/z*, 186 (M<sup>+</sup>).

### 2-(Trifluoromethyl)benzo[b]thiophene (2s):<sup>2</sup>

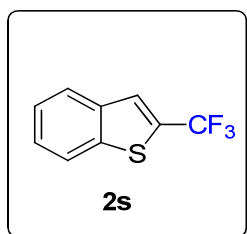

Compound **2r** was isolated in 52% yield (26.2 mg) and 54% yield was determined by <sup>19</sup>F NMR.

<sup>1</sup>H NMR (CDCl<sub>3</sub>, 400 MHz): δ 7.89-7.85 (m, 2H), 7.70 (s, 1H), 7.47-7.43 (m, 2H).

<sup>19</sup>F NMR (CDCl<sub>3</sub>, 282 MHz): δ -57.04 (s, 3F); GC-MS *m/z*, 202 (M<sup>+</sup>).

### 1-Methyl-3-(trifluoromethyl)benzene (2h) from 2h-Bpin:<sup>3,4</sup>

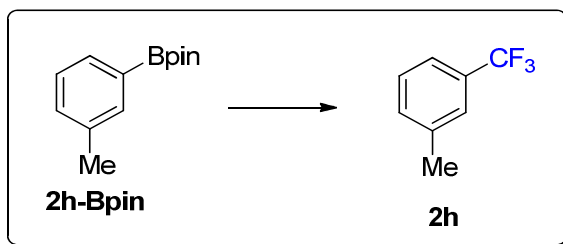

The yield (28%) of **2h** was determined by  $^{19}\text{F}$  NMR.  
 $^{19}\text{F}$  NMR ( $\text{CDCl}_3$ , 282 MHz):  $\delta$  -63.27 (s, 3 F); GC-MS  $m/z$ , 160 ( $\text{M}^+$ ).

### 2-Chloro-5-(trifluoromethyl)pyrimidine (**2t**) from **1t-Bpin**:<sup>3,4</sup>

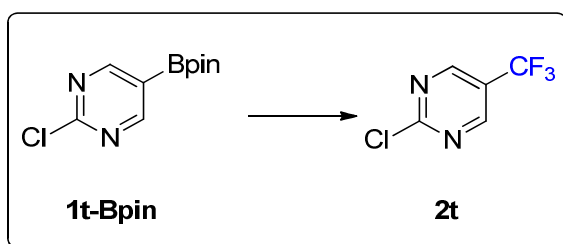

The yield (30%) of **2t** was determined by  $^{19}\text{F}$  NMR.  
 $^{19}\text{F}$  NMR ( $\text{CDCl}_3$ , 282 MHz):  $\delta$  -62.80 (s, 3F); GC-MS  $m/z$ , 182 ( $\text{M}^+$ ).

### General Procedure for the Synthesis of Potassium Alkenyltrifluoroborates: Synthesis of compounds **3a-d** (Scheme 2).

To a solution of the boronic acid (1.4 mmol, 1.0 equiv) in MeOH (1.0 mL) was added 4.5 M aq.  $\text{KHF}_2$  (933  $\mu\text{L}$ , 4.2 mmol, 3.0 equiv) at 0 °C, the resulting mixture was stirred at the same temperature for 1 h. Solvent was removed by distillation; residue was dissolved in hot acetone (20 mL) and filtered. The filtrate was concentrated and dissolved in minimum amount of acetone, precipitated by adding MTBE. The precipitate was collected by filtration to get products as white solids.<sup>6</sup>

**Cyclohex-1-en-1-yltrifluoroborate (**4a**)**. The title compound was isolated as a colourless solid in 84% yield (220 mg). The physical data matched with the literature data.<sup>6</sup>

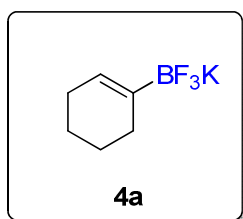

$^1\text{H}$  NMR ( $\text{CD}_3\text{OD}$ , 300 MHz):  $\delta$  ppm 5.75 (s, 1H), 2.0-3.39 (m, 4H), 1.57-1.52 (m,

4H);  $^{13}\text{C}$  NMR ( $\text{CD}_3\text{OD}$ , 100 MHz):  $\delta$  ppm 126.5 (q,  $J = 3.5$  Hz, 1C), 126.22 (s, 1C), 27.52 (s, 1C), 27.09 (s, 1C), 24.61 (s, 1C), 24.41 (s, 1C);  $^{19}\text{F}$  NMR ( $\text{CD}_3\text{OD}$ , 282 MHz):  $\delta$  ppm  $-147.9$ .

**Potassium trans-styryltrifluoroborate (4b).** The title compound was isolated as a colourless solid in 81% yield (240 mg). The physical data matched with the literature data.<sup>6</sup>

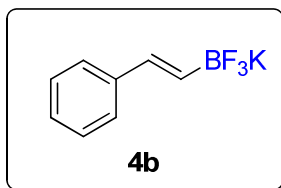

$^1\text{H}$  NMR ( $\text{CD}_3\text{OD}$ , 300 MHz):  $\delta$  ppm 7.46–7.34 (m, 5H), 6.67 (d,  $J = 18.0$  Hz, 1H), 6.27–6.19 (m, 1H);  $^{19}\text{F}$  NMR ( $\text{CD}_3\text{OD}$ , 282 MHz):  $\delta$  ppm  $-143.5$ .

**Potassium 4-methoxy trans-styryltrifluoroborate (4c).** The title compound was obtained as a colorless solid in 73% yield (245 mg). physical data matched with the literature data.<sup>6</sup>

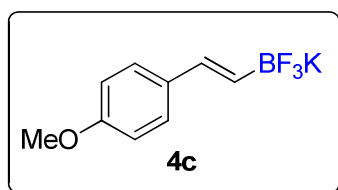

$^1\text{H}$  NMR ( $\text{DMSO}-d_6$ , 300 MHz):  $\delta$  ppm 7.22 (d,  $J = 8.4$  Hz, 2H), 6.81 (d,  $J = 8.4$  Hz, 2H), 6.39 (d,  $J = 18.0$  Hz, 1H), 6.01–5.92 (m, 1H);  $^{19}\text{F}$  NMR ( $\text{DMSO}-d_6$ , 282 MHz):  $\delta$  ppm  $-138.0$ .

**Potassium 4-chloro trans-styryltrifluoroborate (4d).** The title compound was obtained as a colorless solid in 62% yield (215 mg). physical data matched with the literature data.<sup>6</sup>

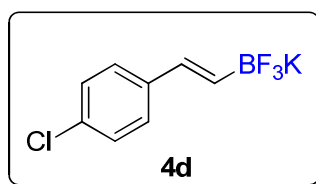

$^1\text{H}$  NMR ( $\text{DMSO}-d_6$ , 300 MHz):  $\delta$  ppm 7.34–7.25 (m, 4H), 6.44 (d,  $J = 18.3$  Hz, 1H), 6.21–5.93 (m, 1H);  $^{19}\text{F}$  NMR ( $\text{DMSO}-d_6$ , 282 MHz):  $\delta$  ppm  $-138.53$ .

**General procedure for the Synthesis of Alkenyl-CF<sub>3</sub> compounds:** Synthesis of compounds **5a** to **5d** (Scheme 2).

A mixture of boronic acids or trifluoroborates (0.25 mmol, 1.0 equiv), CuCl (24.8 mg, 0.25 mmol, 1.0 equiv), NaSO<sub>2</sub>CF<sub>3</sub> (117 mg, 0.75 mmol, 3.0 equiv), NaHCO<sub>3</sub> (21.0 mg, 0.25 mmol, 3.0 equiv) in CH<sub>2</sub>Cl<sub>2</sub> (1.5 mL), MeOH (1.5 mL), and H<sub>2</sub>O (1.2 mL) was cooled to 0 °C, and TBHP (70% solution in water) (172 μL, 5.0 equiv, 1.25 mmol) was added under vigorous stirring. Stirring was continued for 6–12h at room temperature.

For the compounds reported as isolated yields, the organic phase was separated, the aqueous phase was extracted with CH<sub>2</sub>Cl<sub>2</sub> (3 x 10 mL). The combined organic phases were dried over anhydrous Na<sub>2</sub>SO<sub>4</sub>, the solvent was removed at 1 atm and the residue was purified by column chromatography on Combiflash with hexanes to afford the desired compounds.

The volatile products were not isolated and their yields were determined only by <sup>19</sup>F NMR of the reaction mixture. For the compounds reported with <sup>19</sup>F NMR yields, 4-fluorobenzonitrile (0.25 mmol) was added as reference to the reaction mixture, stirred for 5 min, an aliquot of the organic phase was withdrawn for the <sup>19</sup>F NMR measurement in CDCl<sub>3</sub>.

**1-(Trifluoromethyl)cyclohex-1-ene (5a)**<sup>10</sup> from **3a**:

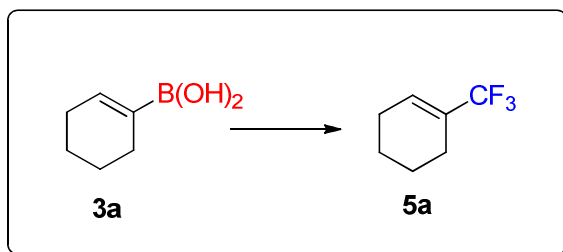

According to the general procedure; compound **5a** was formed in 64% yield by <sup>19</sup>F NMR.

<sup>19</sup>F NMR (CDCl<sub>3</sub>, 282 MHz): δ -70.30 (s, 3F); GC-MS *m/z*, 150 (M<sup>+</sup>).

**1-(Trifluoromethyl)cyclohex-1-ene (5a)**<sup>7</sup> from **4a**:



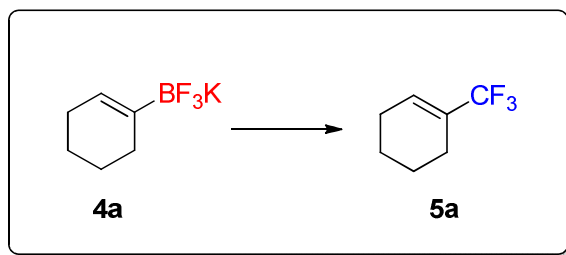

According to the general procedure; compound **5a** was formed in 60% yield by  $^{19}\text{F}$  NMR.

$^{19}\text{F}$  NMR ( $\text{CDCl}_3$ , 282 MHz):  $\delta$   $-70.30$  (s, 3F); GC-MS  $m/z$ , 150 ( $\text{M}^+$ ).

**(E)-(3,3,3-Trifluoro-1-en-1-yl)benzene (5b)**<sup>8</sup> from **3b**:

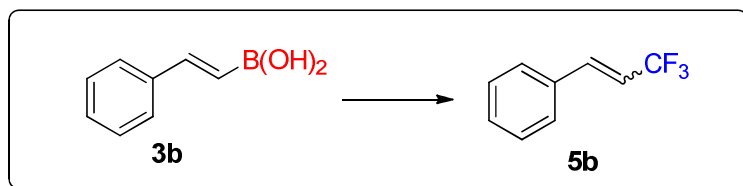

According to the general procedure compound **5b** was obtained in 80% (35 mg) yield and 92% yield was determined by  $^{19}\text{F}$  NMR. A ratio of E/Z = 25:1 was determined by  $^1\text{H}$  NMR

$^1\text{H}$  NMR ( $\text{CDCl}_3$ , 400 MHz):  $\delta$  7.46-7.42 (m, 2H, mixed signal of *E* and *Z* isomers), 7.40-7.34 (m, 3H, mixed signal of *E* and *Z* isomers), 7.14 (dq,  $J = 16.2, 2.2$  Hz, 1H, *E*-isomer), 6.91 (d,  $J = 12.7$  Hz, *Z*-isomer), 6.19 (dq,  $J = 16.4, 7.3$  Hz, 1H, *E*-isomer), 5.76 (d,  $J = 12.7, 9.2$  Hz, *Z*-isomer);  $^{19}\text{F}$  NMR ( $\text{CDCl}_3$ , 282 MHz):  $\delta$   $-64.05$  (s, 3F, *E*-isomer); GC-MS  $m/z$ , 172 ( $\text{M}^+$ ).

**(E)-(3,3,3-Trifluoro-1-en-1-yl)benzene (5b)** from **4b**:

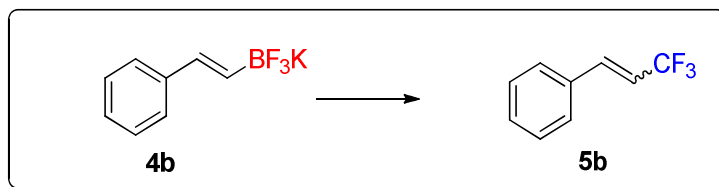

According to the general procedure; compound **5b** was formed in 98% yield by  $^{19}\text{F}$  NMR. A ratio of E/Z = 20:1 was determined by  $^1\text{H}$  NMR.

$^{19}\text{F}$  NMR ( $\text{CDCl}_3$ , 282 MHz).  $\delta$   $-64.03$  (s, 3F, *E*-isomer); GC-MS  $m/z$ , 172 ( $\text{M}^+$ ).

**(E)-1-methoxy-4-(3,3,3-Trifluoro-1-en-1-yl)benzene (5c)<sup>9</sup> from 3c:**

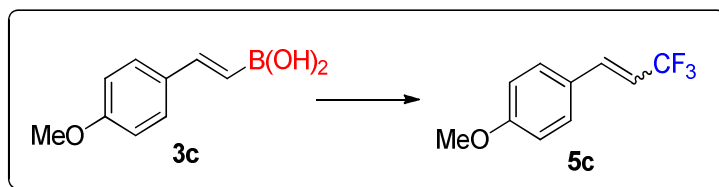

According to the general procedure compound **5c** was isolated in 85% yield (43mg) and 93% yield was determined by <sup>19</sup>F NMR. A ratio of E/Z = 16:1 was determined by <sup>1</sup>H NMR

<sup>1</sup>H NMR (CDCl<sub>3</sub>, 400 MHz): δ 7.39 (d, *J* = 8.8 Hz, 2H, mixed signals of *E* and *Z* isomers), 7.08 (dq, *J* = 16.2, 2.3 Hz, 1H, *E*-isomer), 6.90 (d, *J* = 8.8 Hz, 2H, mixed signals of *E* and *Z* isomers), 6.81 (d, *J* = 12.8 Hz, *Z*-isomer), 6.05 (dq, *J* = 16.2, 6.6 Hz, 1H, *E*-isomer), 5.62 (dq, *J* = 12.8, 9.4 Hz, *Z*-isomer), 3.82 (s, 3H, mixed signals of *E* and *Z* isomers); <sup>19</sup>F NMR (CDCl<sub>3</sub>, 282 MHz): δ -63.49 (s, 3 F, *E*-isomer); GC-MS *m/z*, 202 (M<sup>+</sup>).

**(E)-1-methoxy-4-(3,3,3-Trifluoro-1-en-1-yl)benzene (5c)<sup>9</sup> from 4c:**

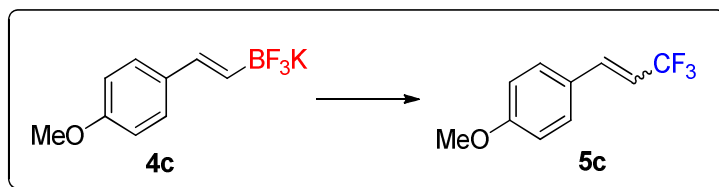

According to the general procedure; compound **5c** was formed in 94% yield by <sup>19</sup>F NMR. A ratio of E/Z = 13:1 was determined by <sup>1</sup>H NMR.

<sup>19</sup>F NMR (CDCl<sub>3</sub>, 282 MHz): δ -63.36 (s, 3F, *E*-isomer); GC-MS *m/z*, 202 (M<sup>+</sup>).

**(E)-1-chloro-4-(3,3,3-Trifluoro-1-en-1-yl)benzene (5d)<sup>9</sup> from 3d:**

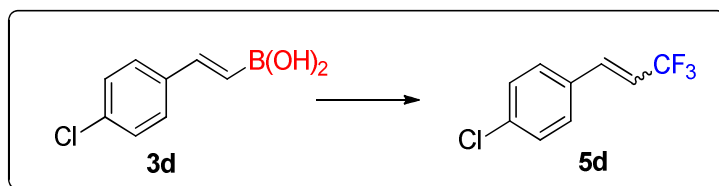

According to the general procedure compound **5d** was isolated in 62% yield

(32mg) and 86% yield was determined by  $^{19}\text{F}$  NMR. A ratio of E/Z = 12:1 was determined by  $^1\text{H}$  NMR.

$^1\text{H}$  NMR (DMSO  $d_6$ , 300 MHz):  $\delta$  7.37–7.32 (m, 4H, mixed signals of *E* and *Z* isomers), 7.09 (dq,  $J = 16.2, 2.2$  Hz, 1H, *E*-isomer), 6.86 (d,  $J = 12.4$  Hz, *E*-isomer), 6.17 (dq,  $J = 16.2, 6.6$  Hz, 1H, *E*-isomer), 5.78 (dq,  $J = 12.4, 9.0$  Hz, *Z*-isomer);  $^{19}\text{F}$  NMR ( $\text{CDCl}_3$ , 282 M Hz):  $\delta$  -64.08 (s, 3F, *E*-isomer); GC-MS  $m/z$ , 206 ( $\text{M}^+$ ).

**(*E*)-1-chloro-4-(3,3,3-Trifluoro-1-en-1-yl)benzene (5d)**<sup>9</sup> from **4d**:

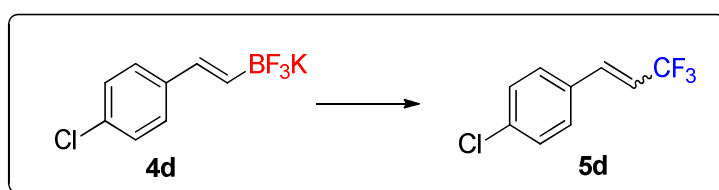

According to the general procedure compound **5d** was formed in 74% yield by  $^{19}\text{F}$  NMR. A ratio of E/Z = 3:1 was determined by  $^1\text{H}$  NMR.

$^{19}\text{F}$  NMR ( $\text{CDCl}_3$ , 282 M Hz):  $\delta$  -63.98 (s, 3F, *E*-isomer); GC-MS  $m/z$ , 206 ( $\text{M}^+$ ).

## References

1. Xu, J.; Luo, D.-F.; Xiao, B.; Liu, Z.-J.; Gong, T.-J.; Fu, Y.; Liu, L. *Chem. Commun.* **2011**, 4300.
2. Liu, T.; Shen, Q. *Org. Lett.* **2011**, 13, 2342; Chu, L.; Qing, F.-L. *Org. Lett.* **2010**, 12, 5060
3. (a) Khan, B. A.; Buba, A. E.; Gooßen, L. J. *Chem. — Eur. J.* **2011**, 17, 2689. (b) Novàk, P.; Lishchynskyi, A.; Grushin, V. V. *Angew. Chem., Int. Ed.* **2012**, 51, 7767.
4. Huang, Y.; Fang, X.; Li, H.; H, W.; Huang, K.-W.; Yuan, Y.; Weng, Z. *Tetrahedron Lett.* **2012**, 68, 9949.
5. (a) Ye, Y.; Künzi, S. A.; Sanford, M. S. *Org. Lett.* **2012**, 14, 4979. (b) Ye, Y.; Sanford, M. S. *J. Am. Chem. Soc.* **2012**, 134, 9034.
6. (a) Brak, K.; Ellman, J. A. *J. Am. Chem. Soc.* **1999**, 121, 3850 and references therein. (b) Molander, G. A.; Petrillo, D. E. *J. Am. Chem. Soc.* **2006**, 128, 9634. (c) Vedejs, E.; Fields, S. C.; Hayashi, R.; Hithcock, S. R.; Powell, D. R.; Schrimpf, M. R. *J. Am. Chem. Soc.* **1999**, 121, 2460
7. Cho, E. J.; Buchwald, S. L. *Org. Lett.* **2011**, 13, 6552.
8. Prakash, G. K. S.; Krishnan, H. S.; Jog, P. V.; Lyer, A. P.; Olah, G. A. *Org. Lett.* **2012**, 14, 1146.
9. (a) Liu, T.; Shen, Q. *Org. Lett.* **2011**, 13, 2342; (b) Hanamoto, T.; Morita, N.; Shindo, K. *Eur. J. Org. Chem.* **2003**, 21, 4279.

**$^{19}\text{F}$  NMR of 4-fluorobenzonitrile (internal standard) in  $\text{CDCl}_3$**

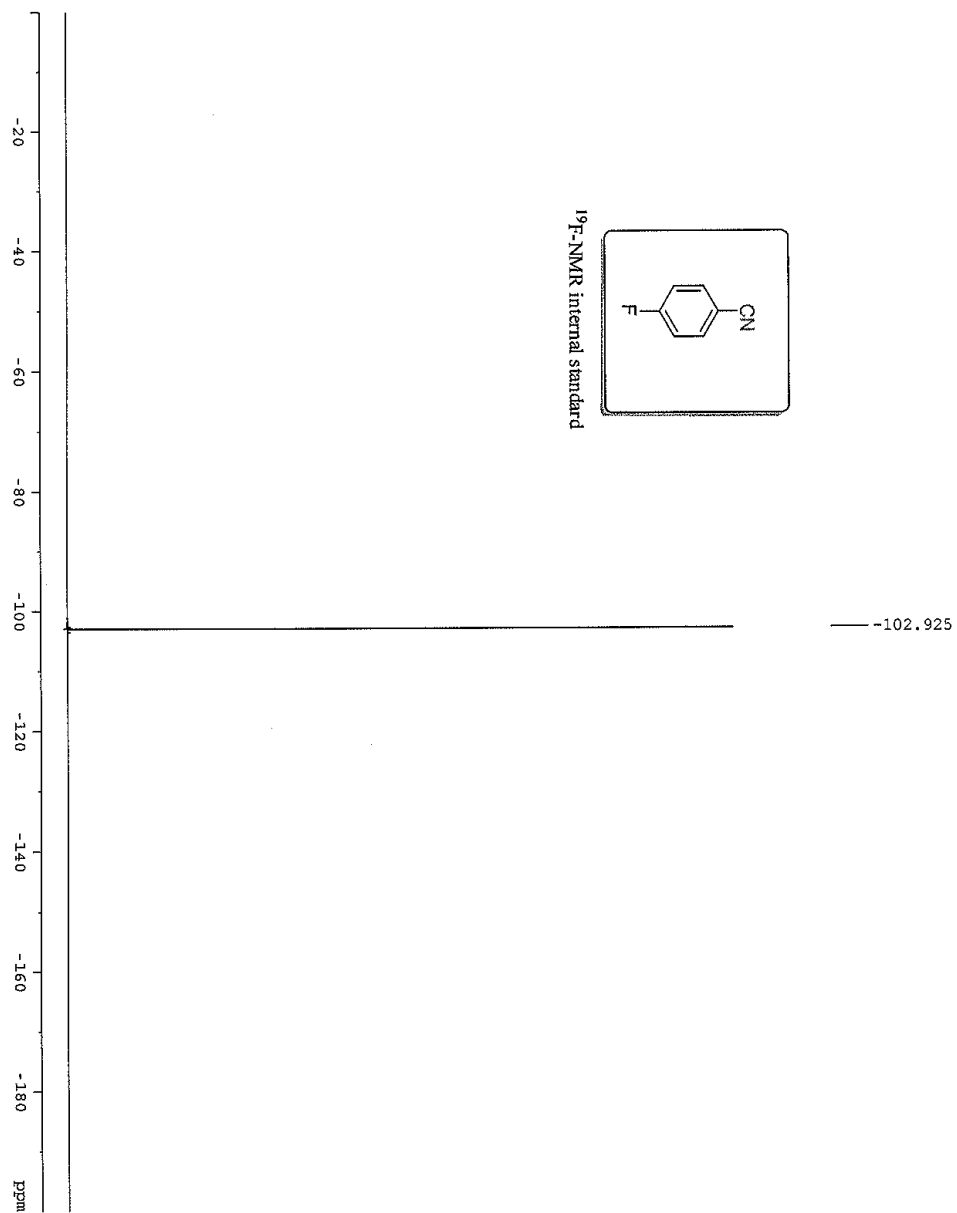

## GC-MS of crude 2a

Analytic : GC/MS  
Instrument : Shimadzu GC-2010  
Analyzed by : Adina  
Analyzed : 7/27/2013 11:39:15 PM  
Sample Type : Unknown  
Level # : 1  
Sample Name : SG-NSD-P2-2-NAHCO3-t  
Sample ID : SG-NSD-P2-2-NAHCO3-t  
IS Amount : [1]=1  
Sample Amount : 1  
Standard Factor : 1  
Yield : 1  
Injection Volume : 1

### Sample Information

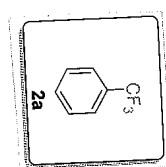

### Spectrum

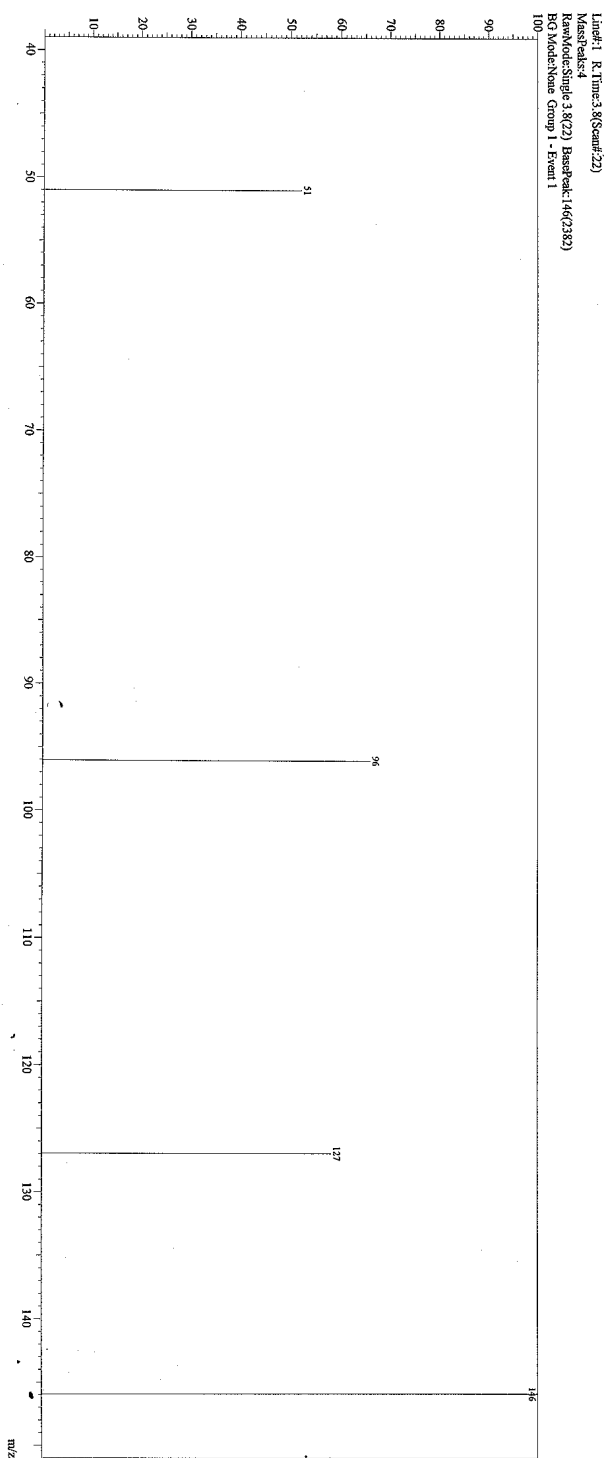

$^{19}\text{F}$  NMR yield of compound 2a  $(2.48/(1 \times 3) \times 100\% = 82\%)$  in  $\text{CDCl}_3$

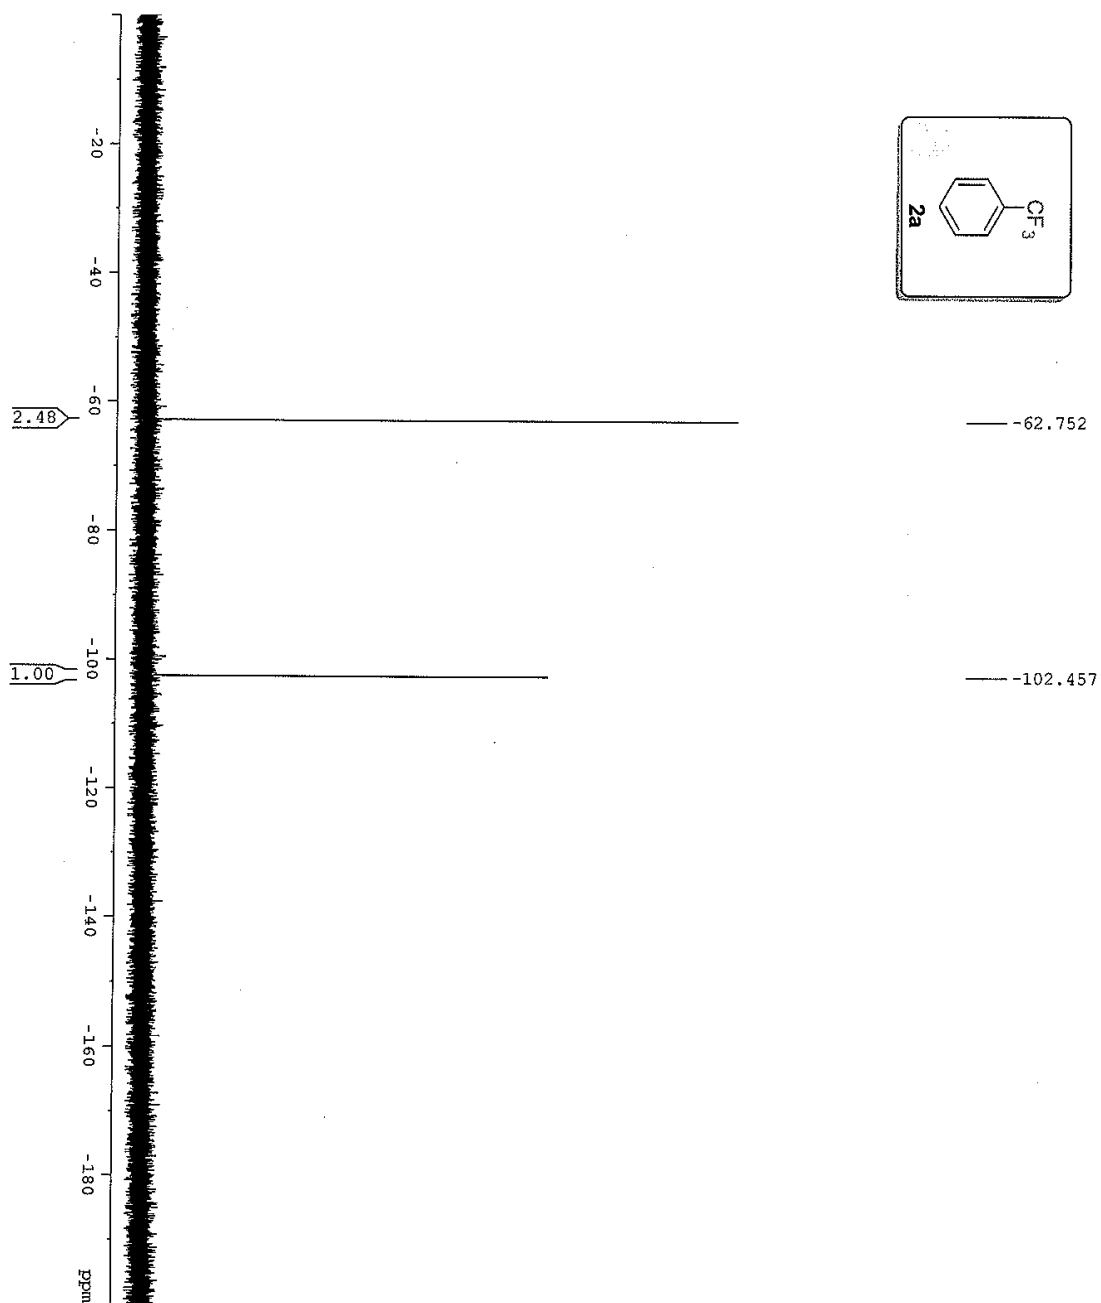

## GC-MS of crude 2b

Analyte : GCMS  
Instrument : Shimadzu GC-2010  
Analyzed by : Admin  
Analyzed : 8/2/2013 12:09:25 PM  
Sample Type : Unknown  
Level # : 1  
Sample Name : SG-NSD-1-11  
Sample ID : SG-NSD-1-11  
IS Amount : 1  
Sample Amount : 1  
Dilution Factor : 1  
Vial # : 4  
Injection Volume : 3

### Sample Information

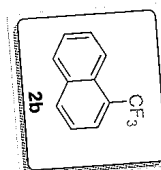

### Spectrum

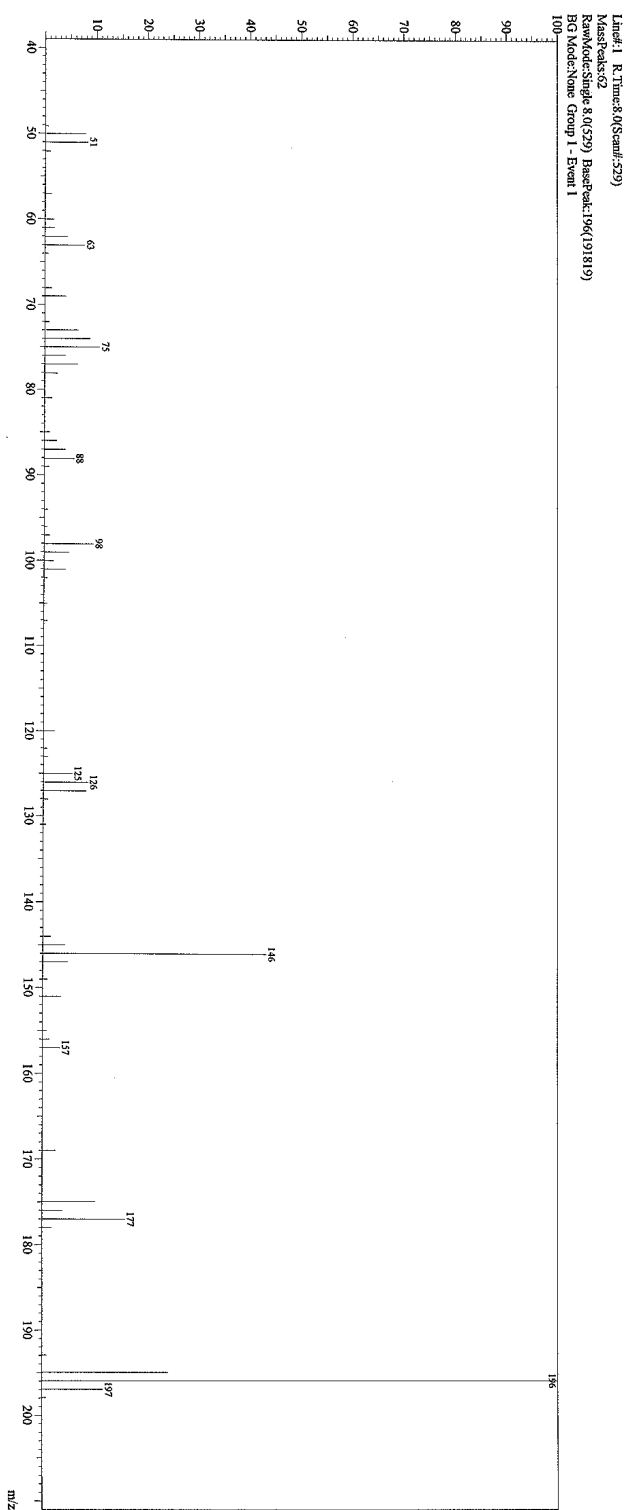



### $^1\text{H}$ NMR of compound 2b

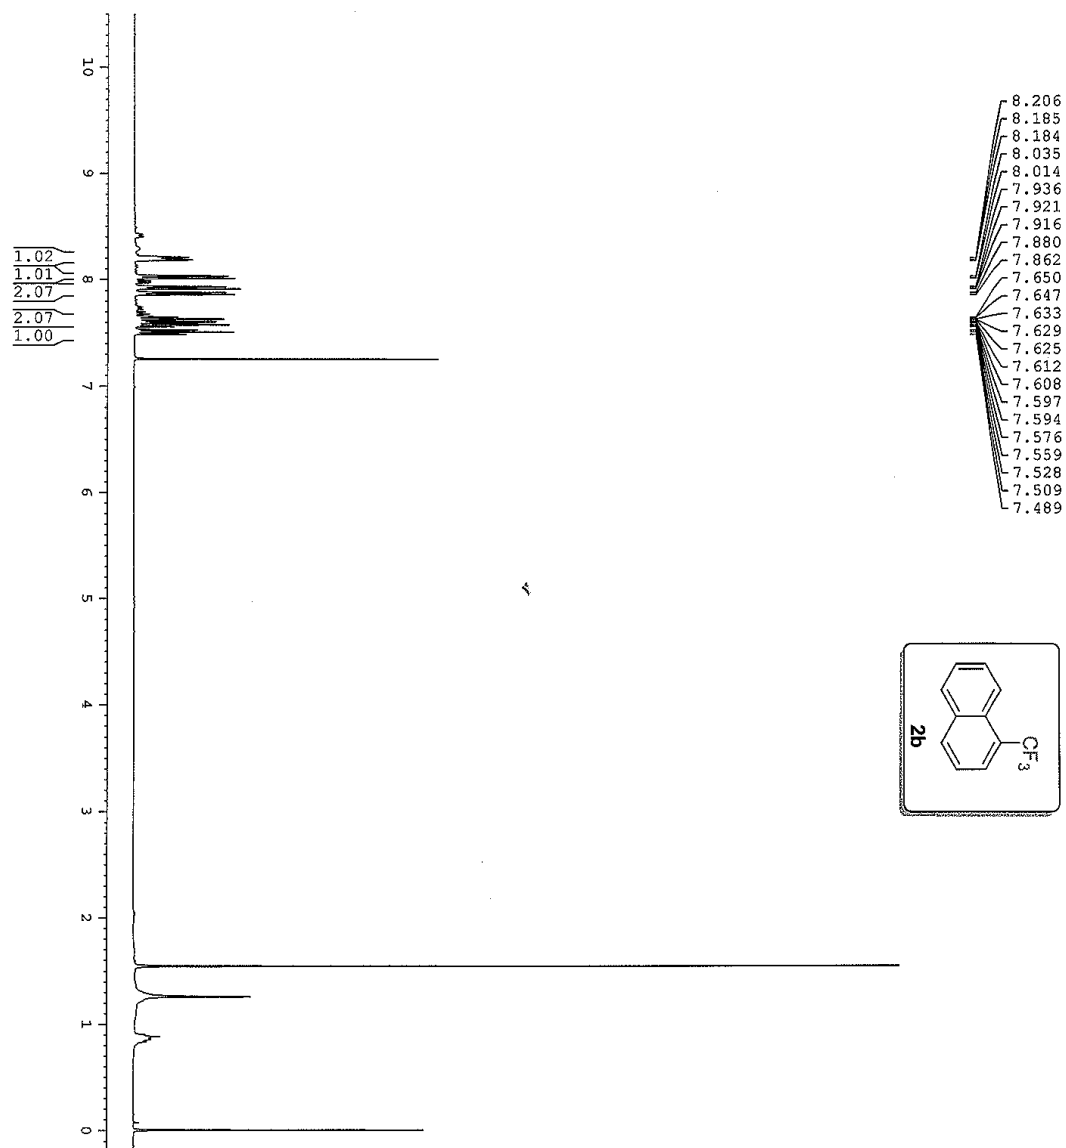

### <sup>13</sup>C NMR of compound 2b

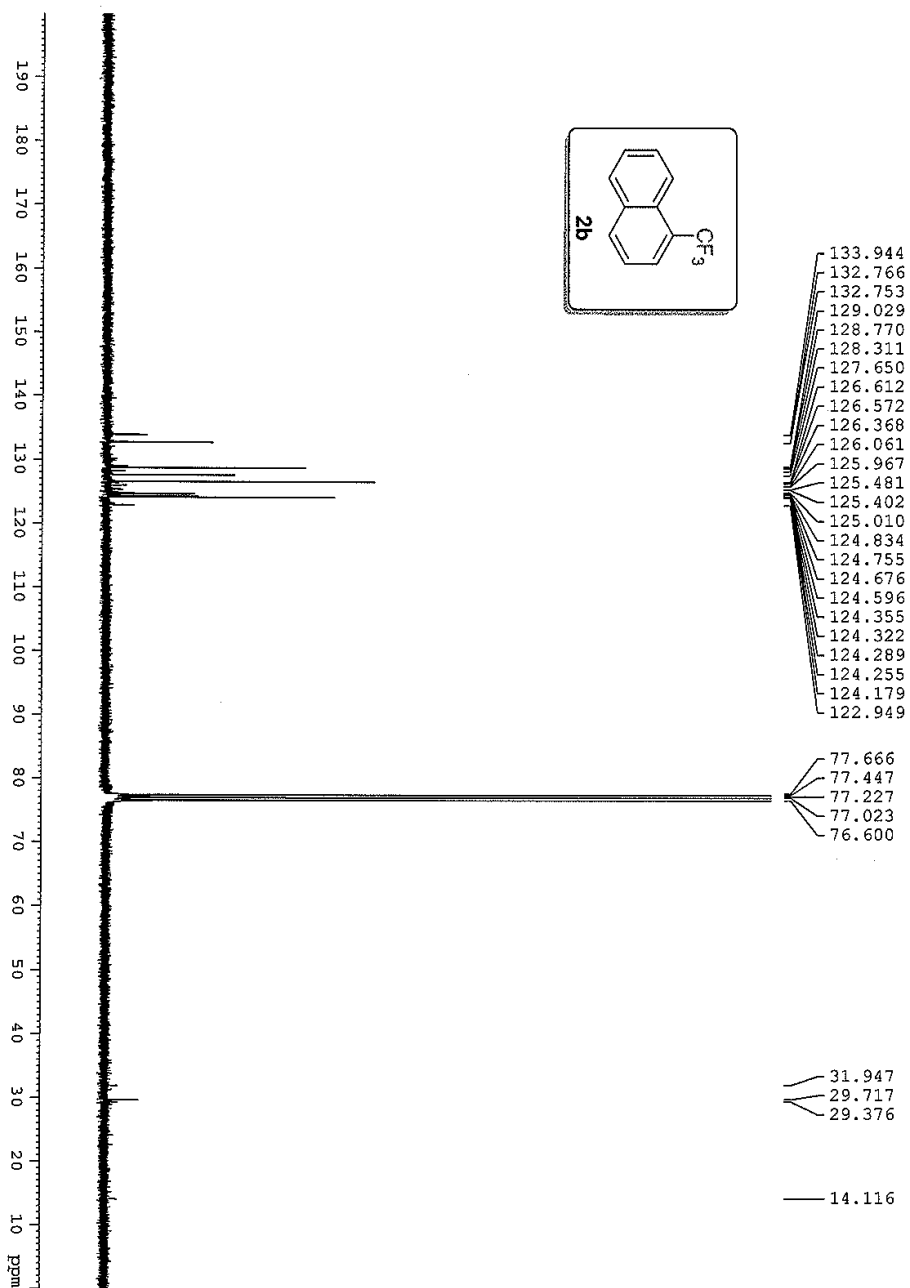

$^{19}\text{F}$  NMR of isolated 2b in  $\text{CDCl}_3$

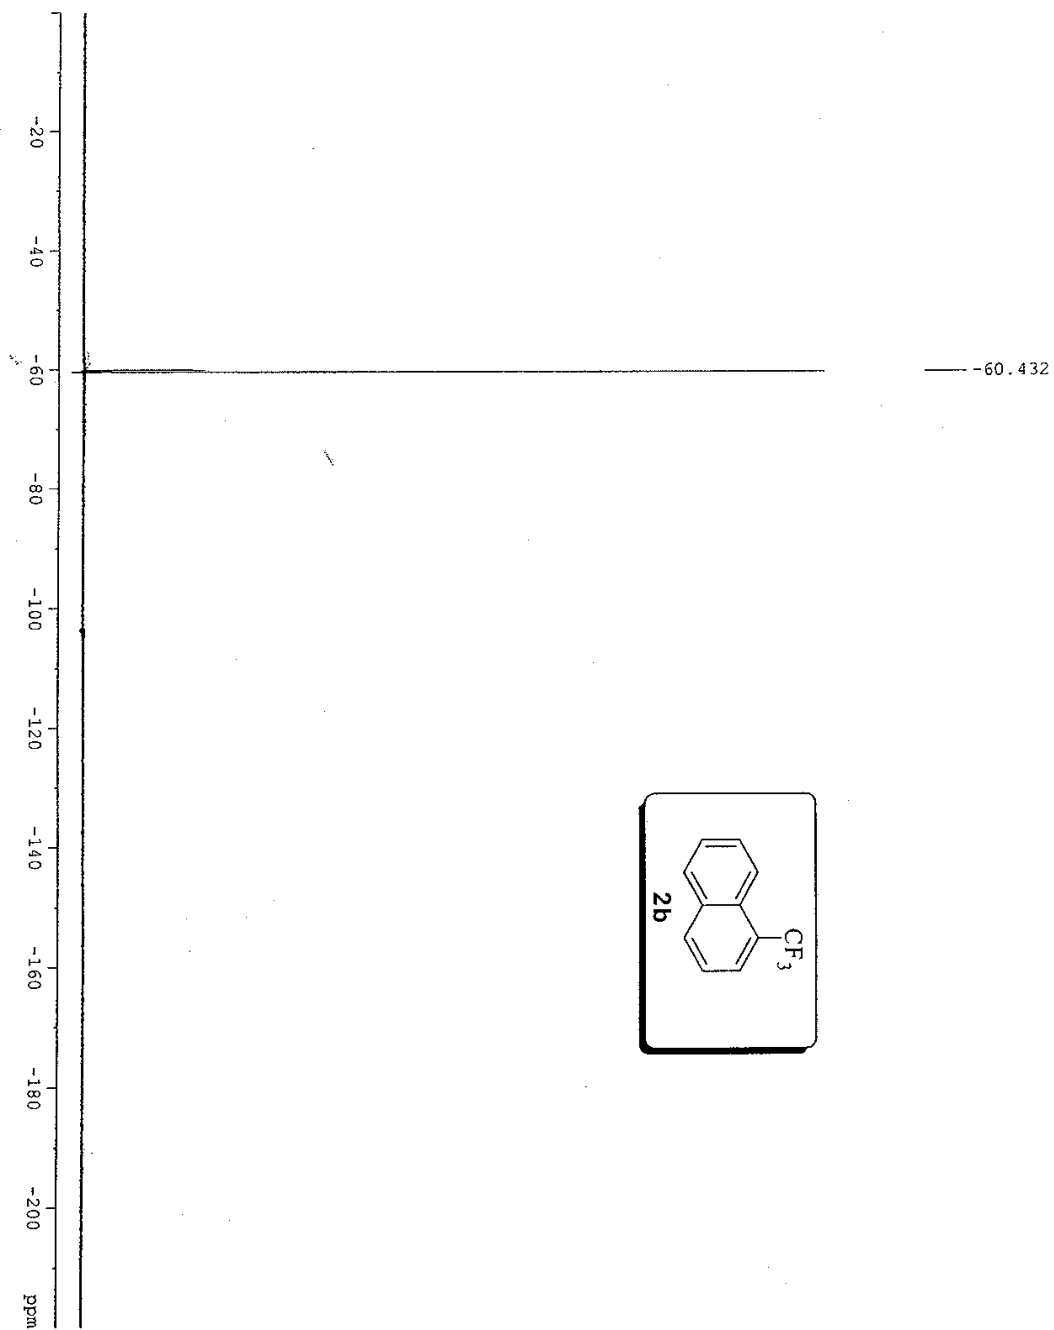

## GC-MS of crude 2c

Analysis : GC/MS  
Instrument : Shimadzu GC-2010  
Acquisition Method : GC/MS  
Analyzed By : 8/15/2013 8:15:26 AM  
Sample Type : Unknown  
Level # : 1  
Sample Name : SGC-NSD-I-19  
Sample ID : SGC-NSD-I-19  
IS Amount : [1]=1  
Sample Amount : 1  
Dilution Factor : 1  
Vial # : 1  
Injection Volume : 3

### Sample Information

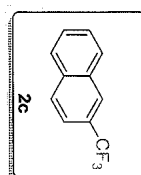

### Spectrum

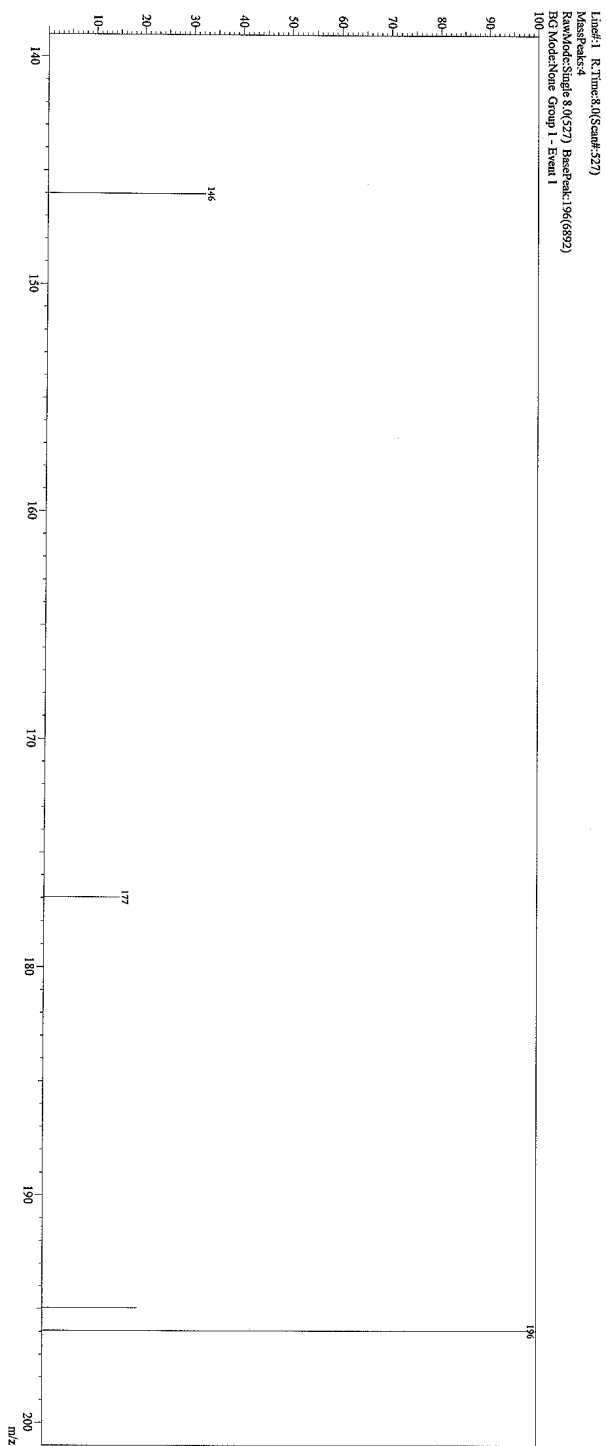

$^{19}\text{F}$  NMR of crude **2c** in  $\text{CDCl}_3$

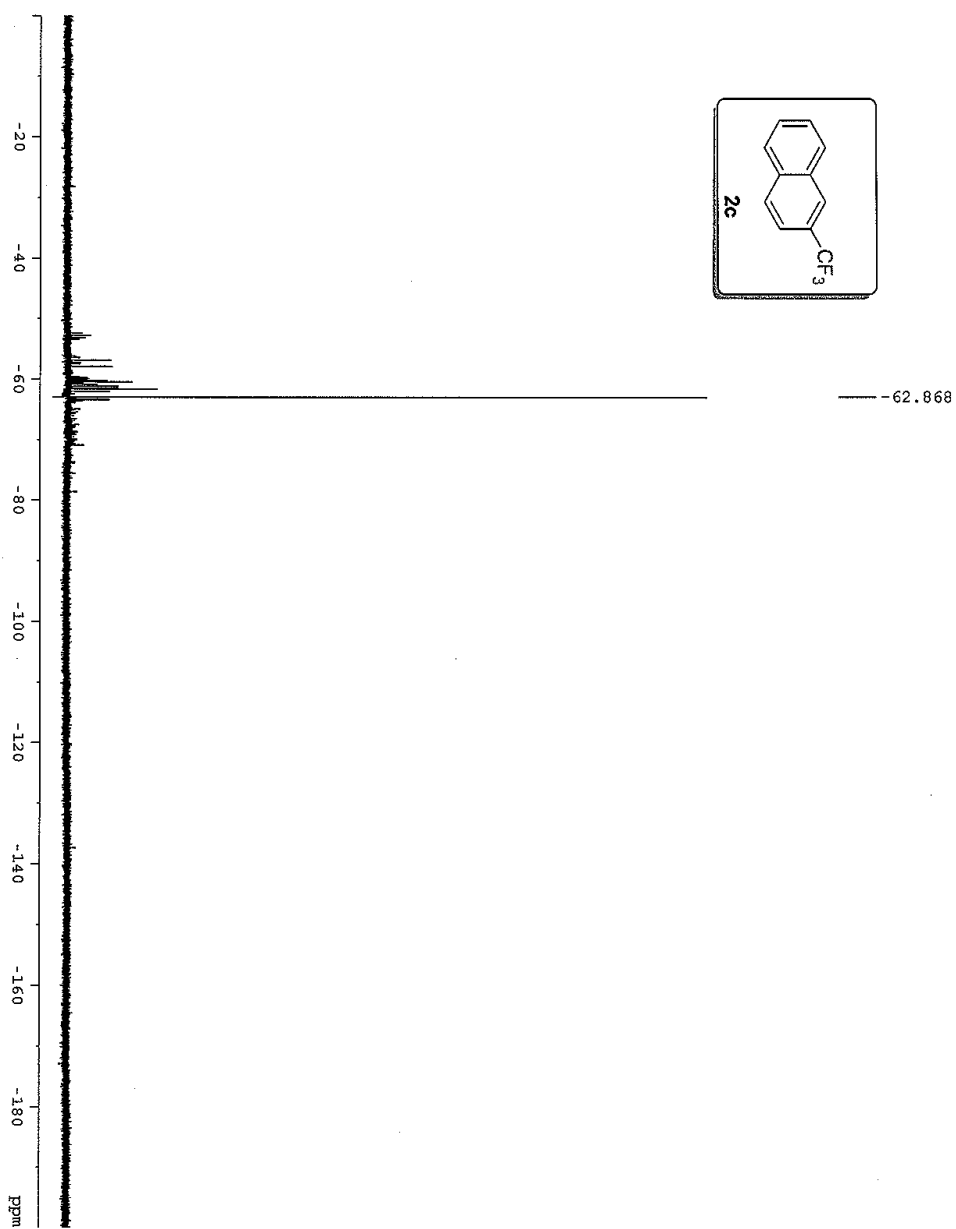

$^{19}\text{F}$  NMR yield of compound 2c  $(1.72/(1 \times 3) \times 100\% = 57\%)$  in  $\text{CDCl}_3$

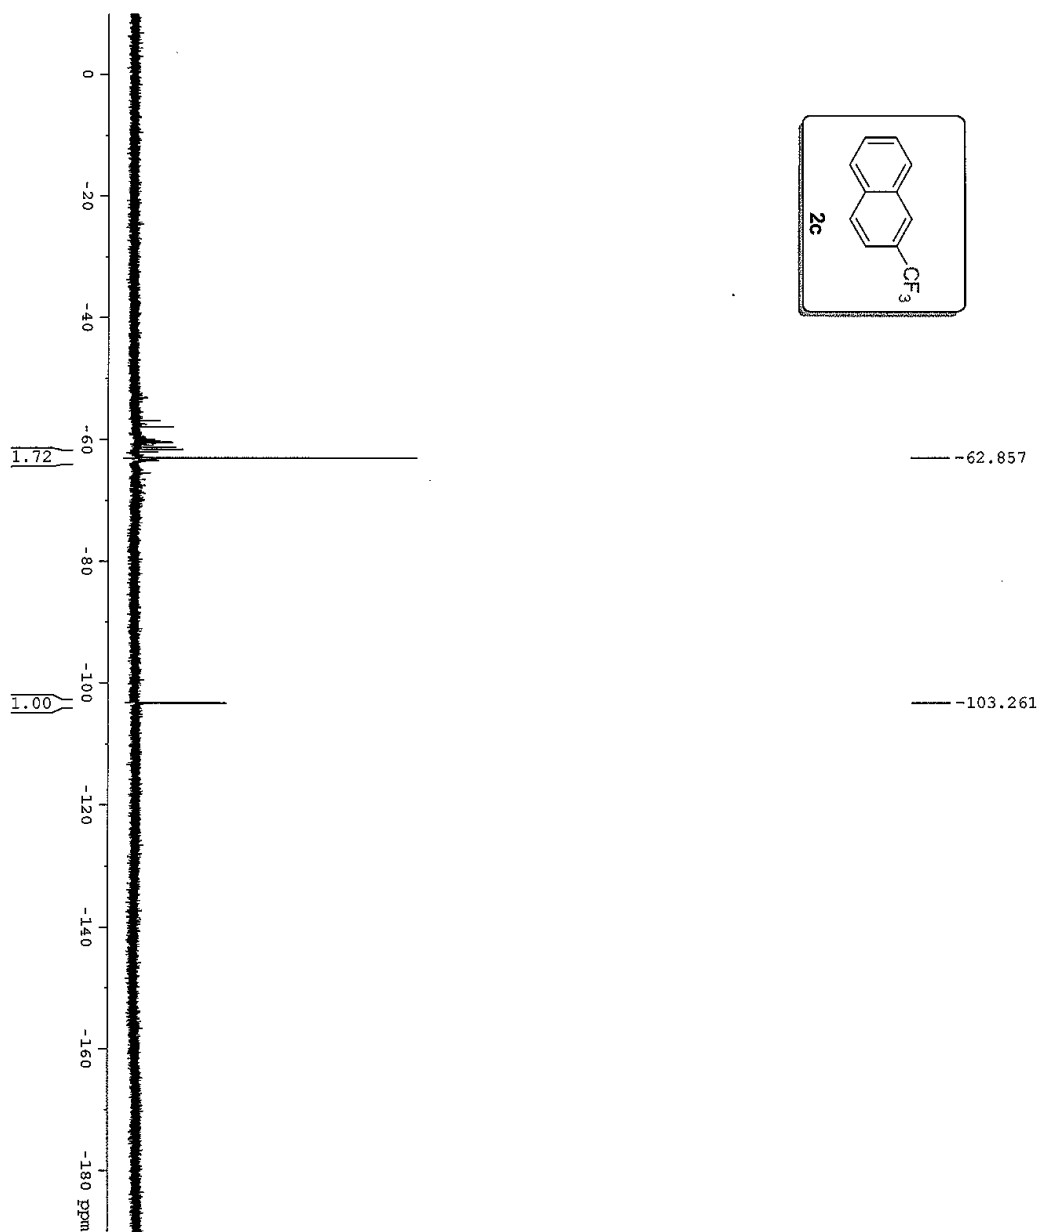

## GC-MS of crude 2d

Analysis : GC/MS  
Instrument : Shimadzu GC-2010  
Analyzed by : Admin  
Analyzed : 8/9/2013 12:19:56 PM  
Sample Type : Unknown  
Level # : 1  
Sample Name : SG-MNNS-I-17  
Sample ID : SG-MNNS-I-17  
IS Amount : 1 µl  
Sample Amount : 1  
Dilution Factor : 1  
Vial # : 5  
Injection Volume : 3

### Sample Information

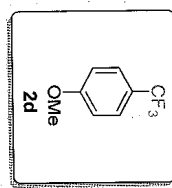

### Spectrum

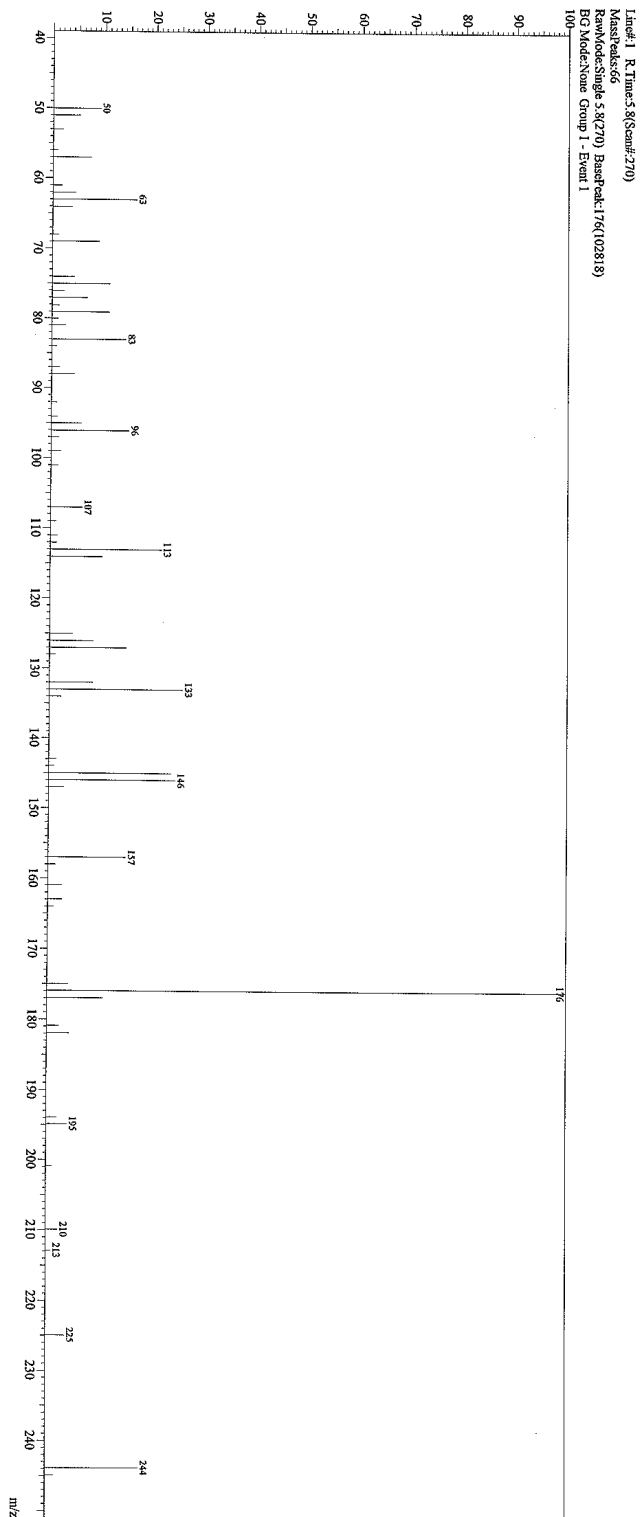

$^{19}\text{F}$  NMR of crude 2d in  $\text{CDCl}_3$

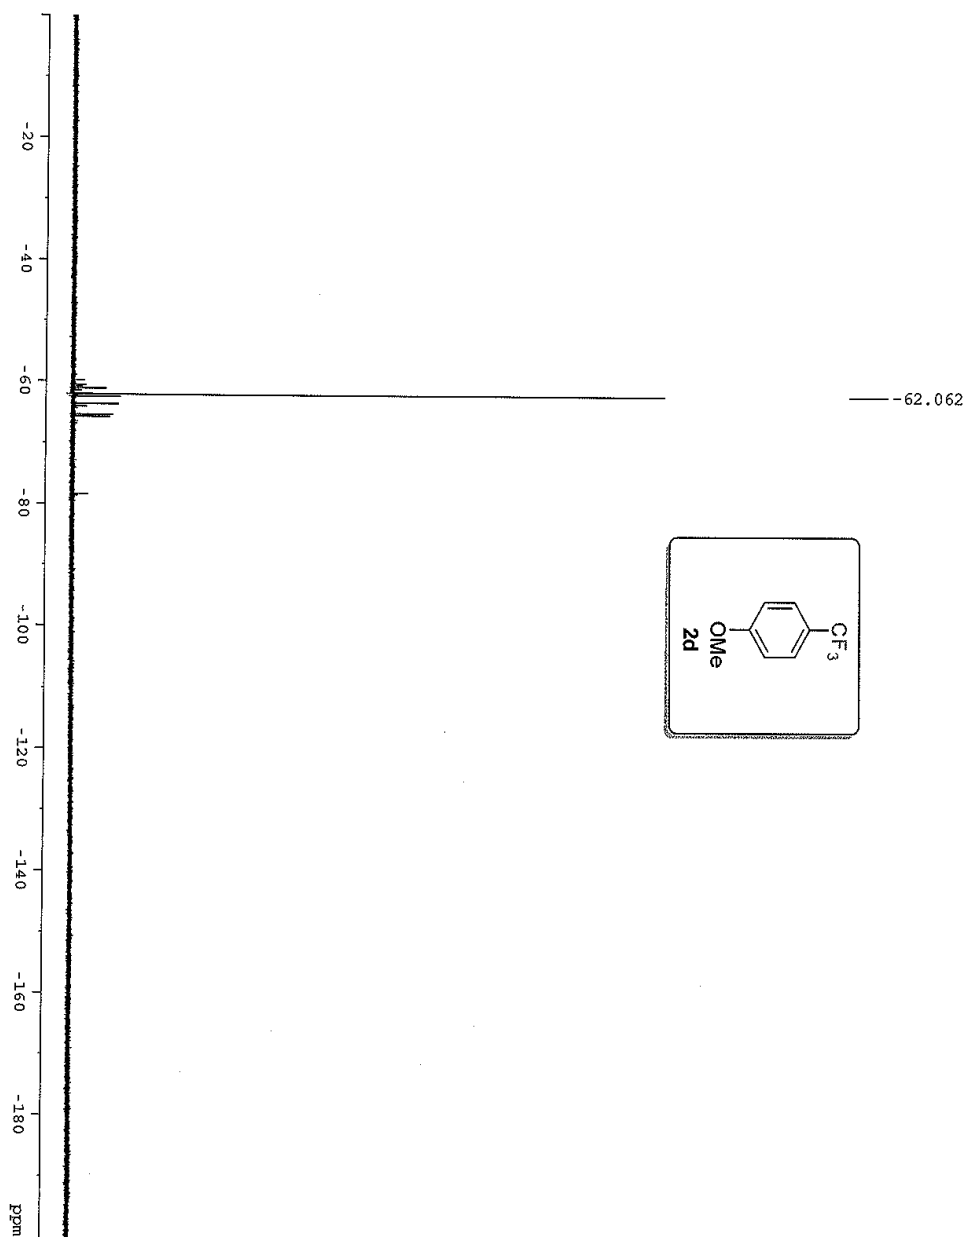



$^{19}\text{F}$  NMR yield of compound 2d  $(2.22/(1 \times 3) \times 100\% = 74\%)$  in  $\text{CDCl}_3$

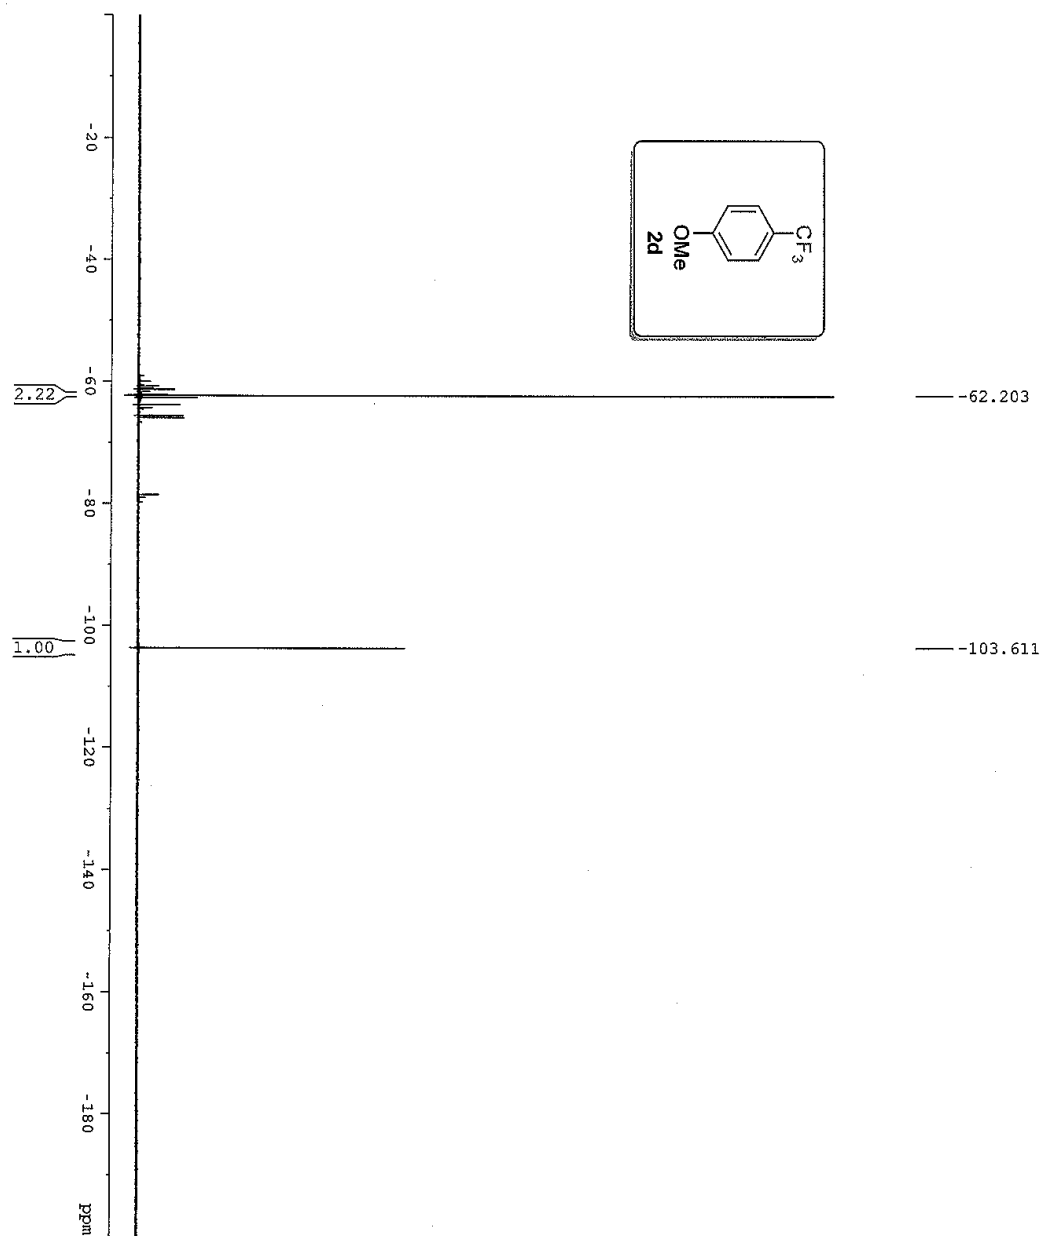

## GC-MS of crude 2e

Sample Information

Analysis : GC-MS  
Instrument : Shimadzu GC-2010  
Analyzed by : Admin  
Analyzed : 8/8/2013 2:57:29 PM  
Sample Type : Unknown  
Level # : 1  
Sample Name : SG-MNS-1-9  
Sample ID : SG-MNS-1-9  
IS Amount : [1]=1  
Sample Amount : 1  
Dilution Factor : 1  
Vial # : 6  
Injection Volume : 3

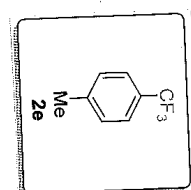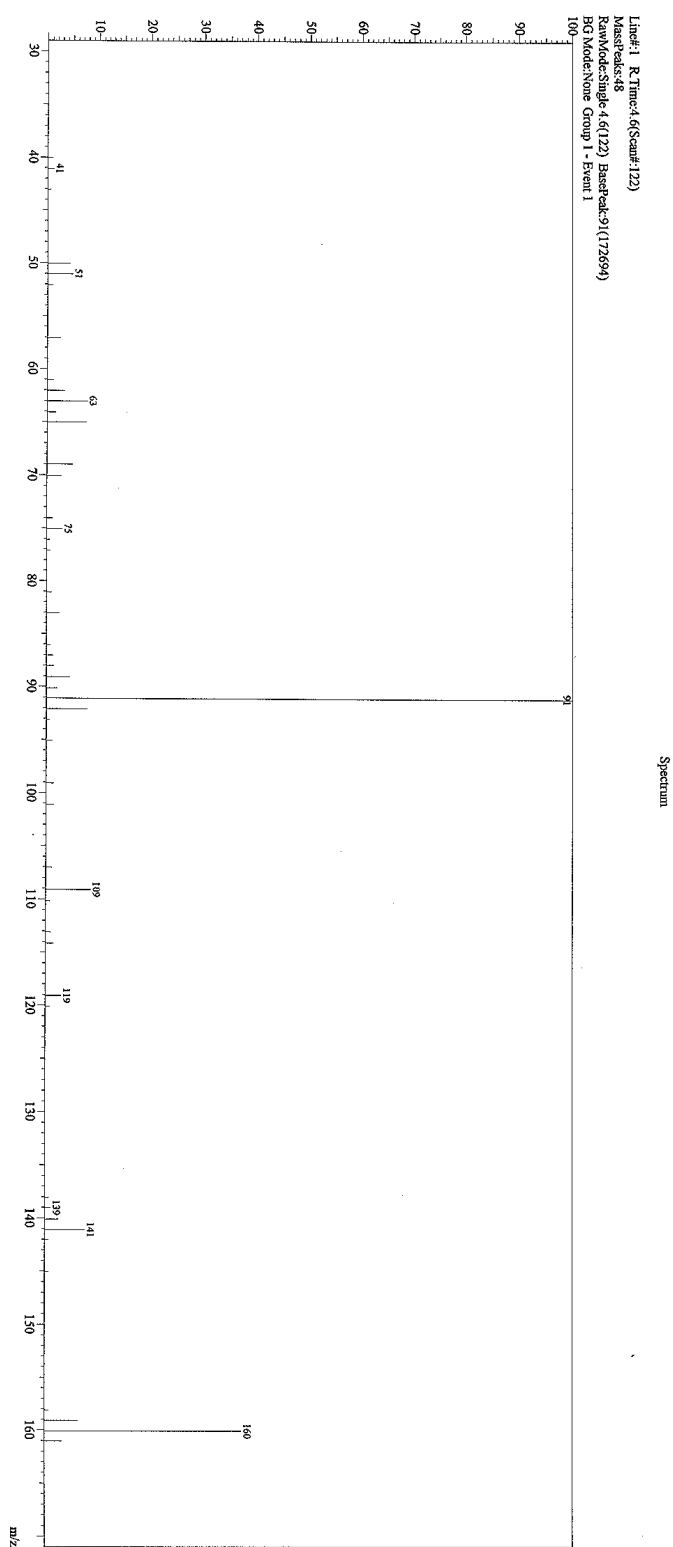

**$^{19}\text{F}$  NMR of crude 2e in  $\text{CDCl}_3$**

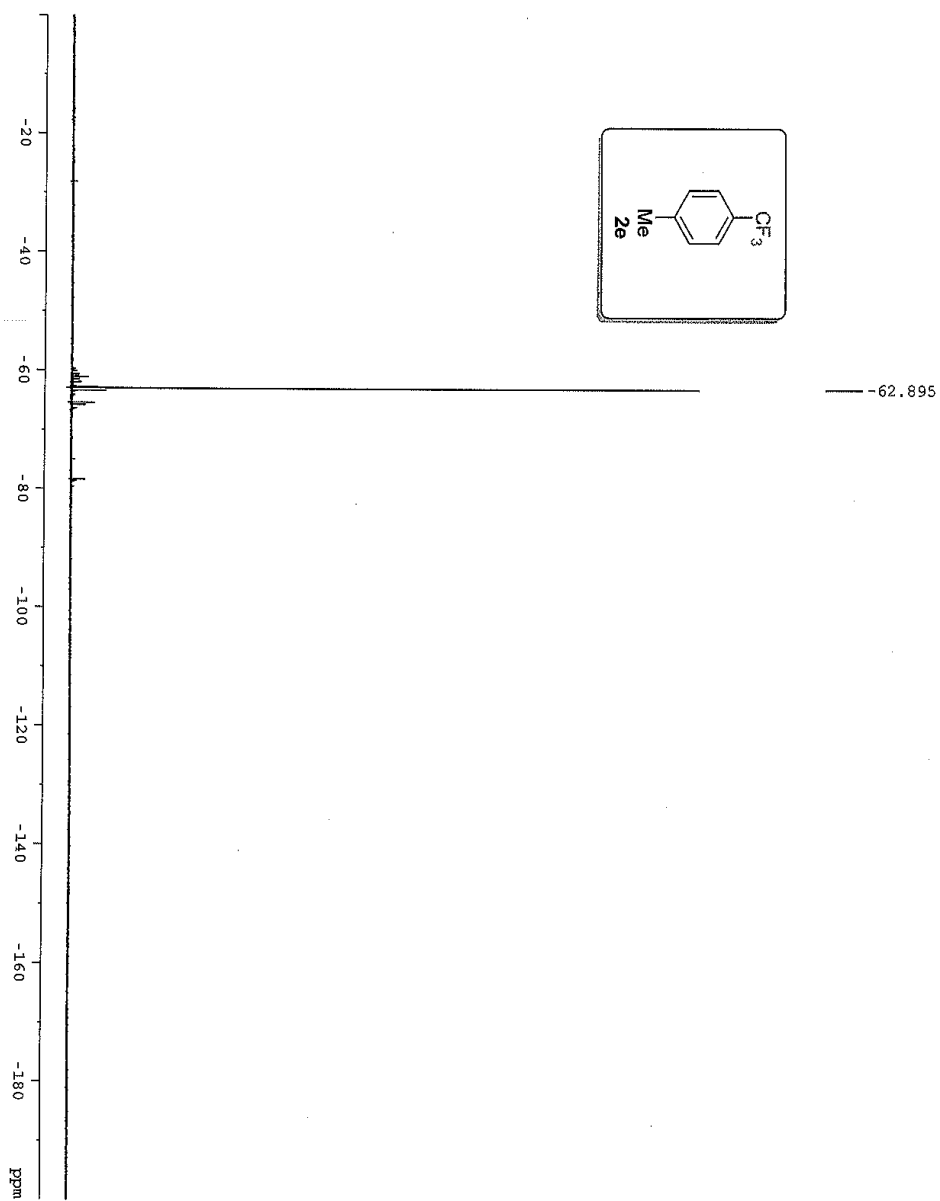

$^{19}\text{F}$  NMR yield of compound 2e  $(2.36/(1 \times 3) \times 100\% = 79\%)$  in  $\text{CDCl}_3$

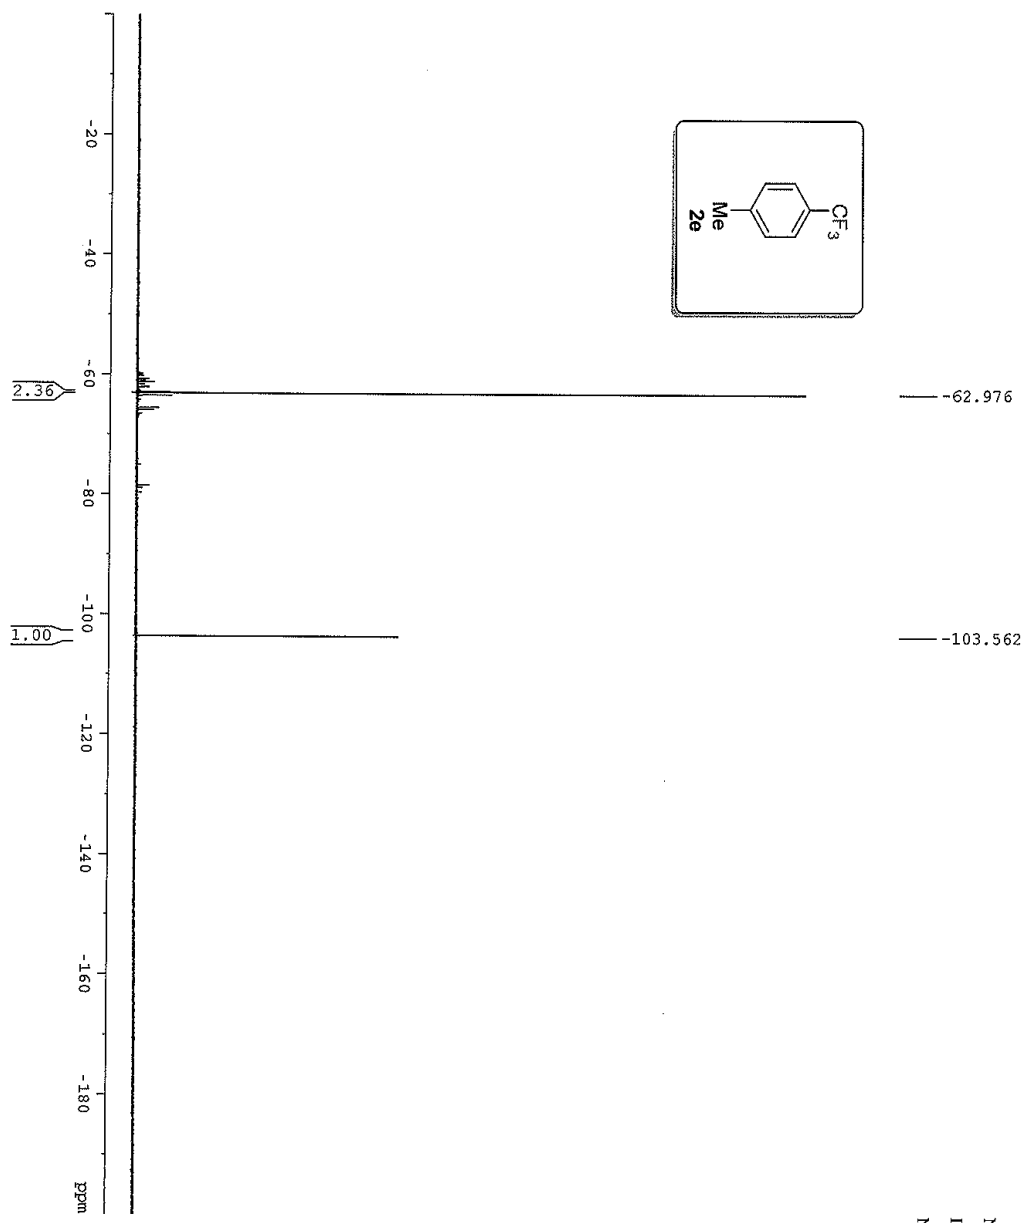

## GC-MS of crude 2f

Analysis : GC/MS  
Instrument : Shimadzu GC-2010  
Analyzed by : Admin  
Analyzed : 8/15/2013 11:10:59 AM  
Sample Type : Unknown  
Level # : 1  
Sample Name : SG-MNS-4-20  
Sample ID : SG-MNS-4-20  
IS Amount : 1 µl  
Sample Amount : 1  
Dilution Factor : 1  
Vial # : 6  
Injection Volume : 3

sample unknown

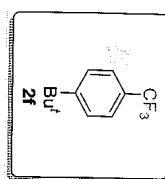

Spectrum

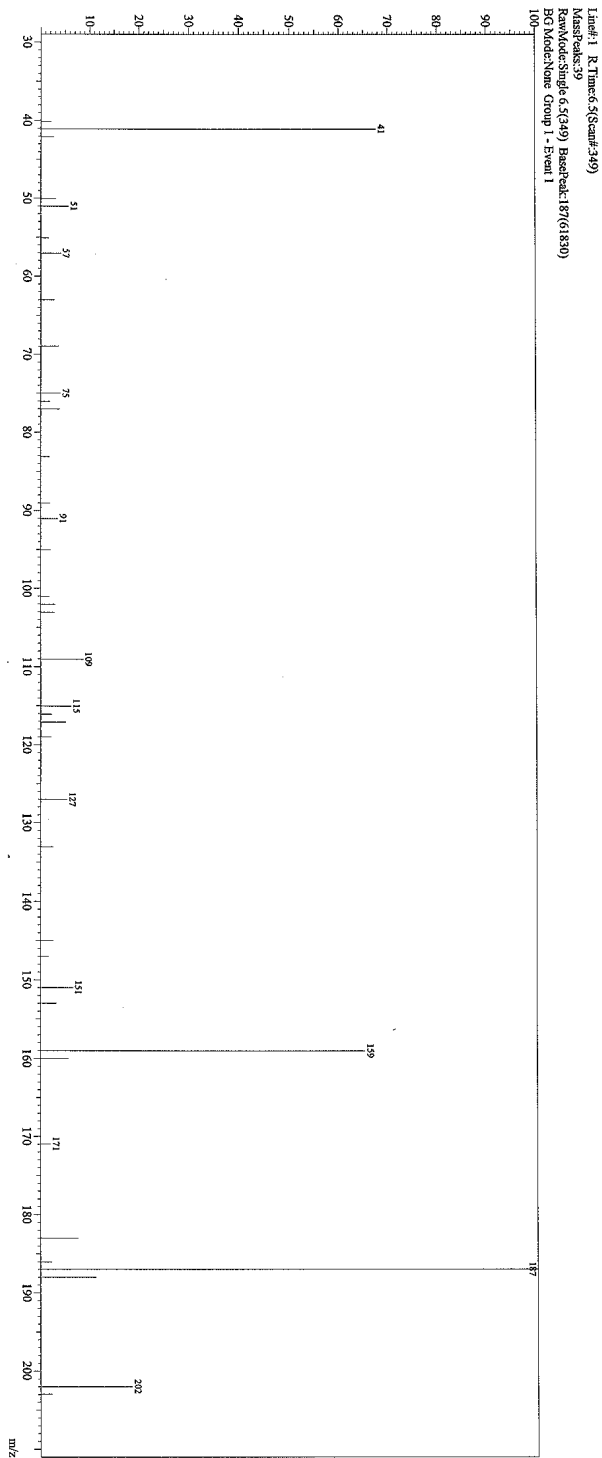

$^{19}\text{F}$  NMR of crude 2f in  $\text{CDCl}_3$

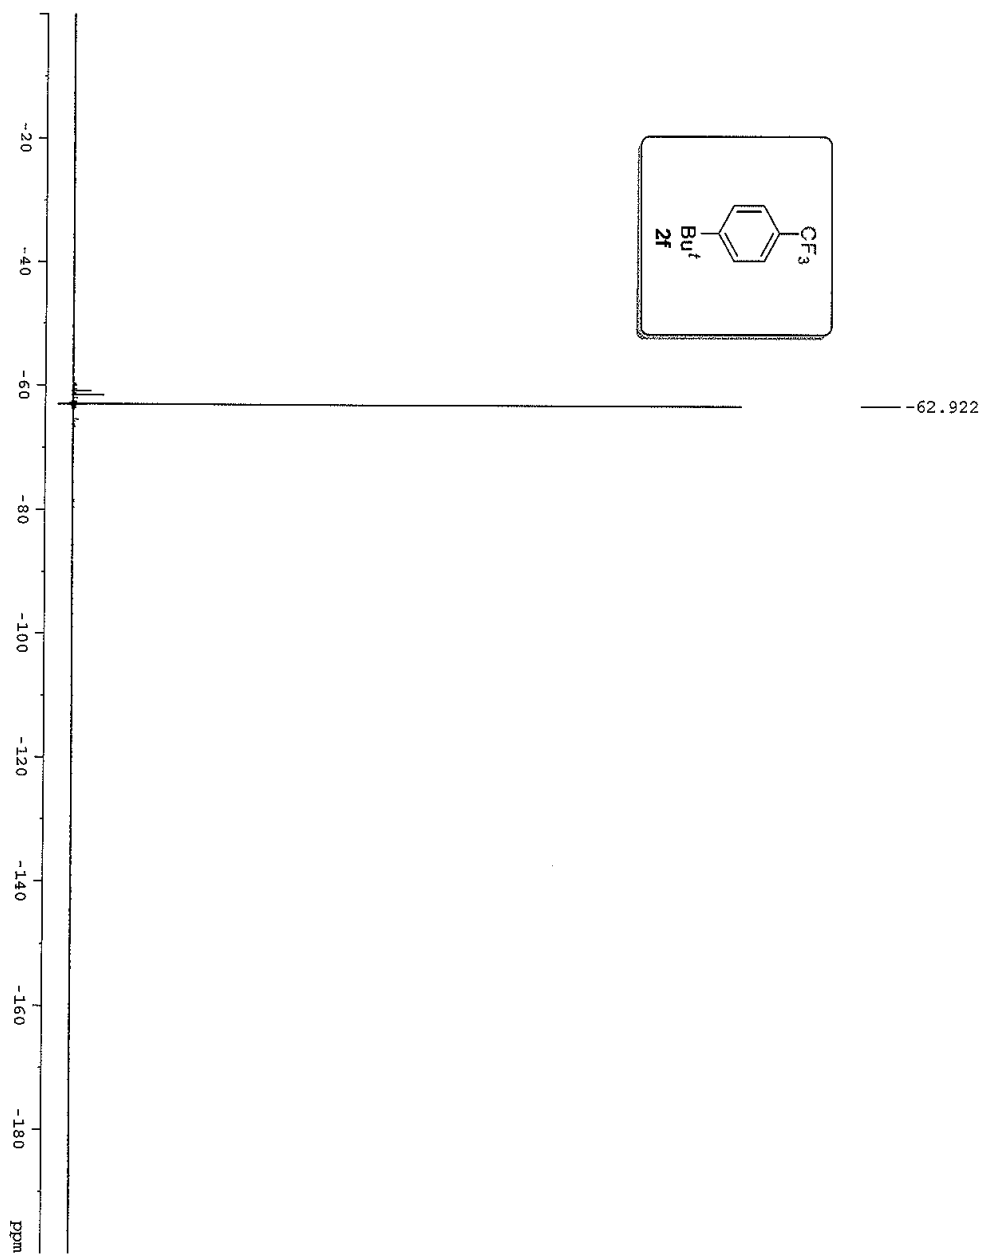

$^{19}\text{F}$  NMR yield of compound 2f ( $2.31/(1 \times 3) \times 100\% = 77\%$ ) in  $\text{CDCl}_3$

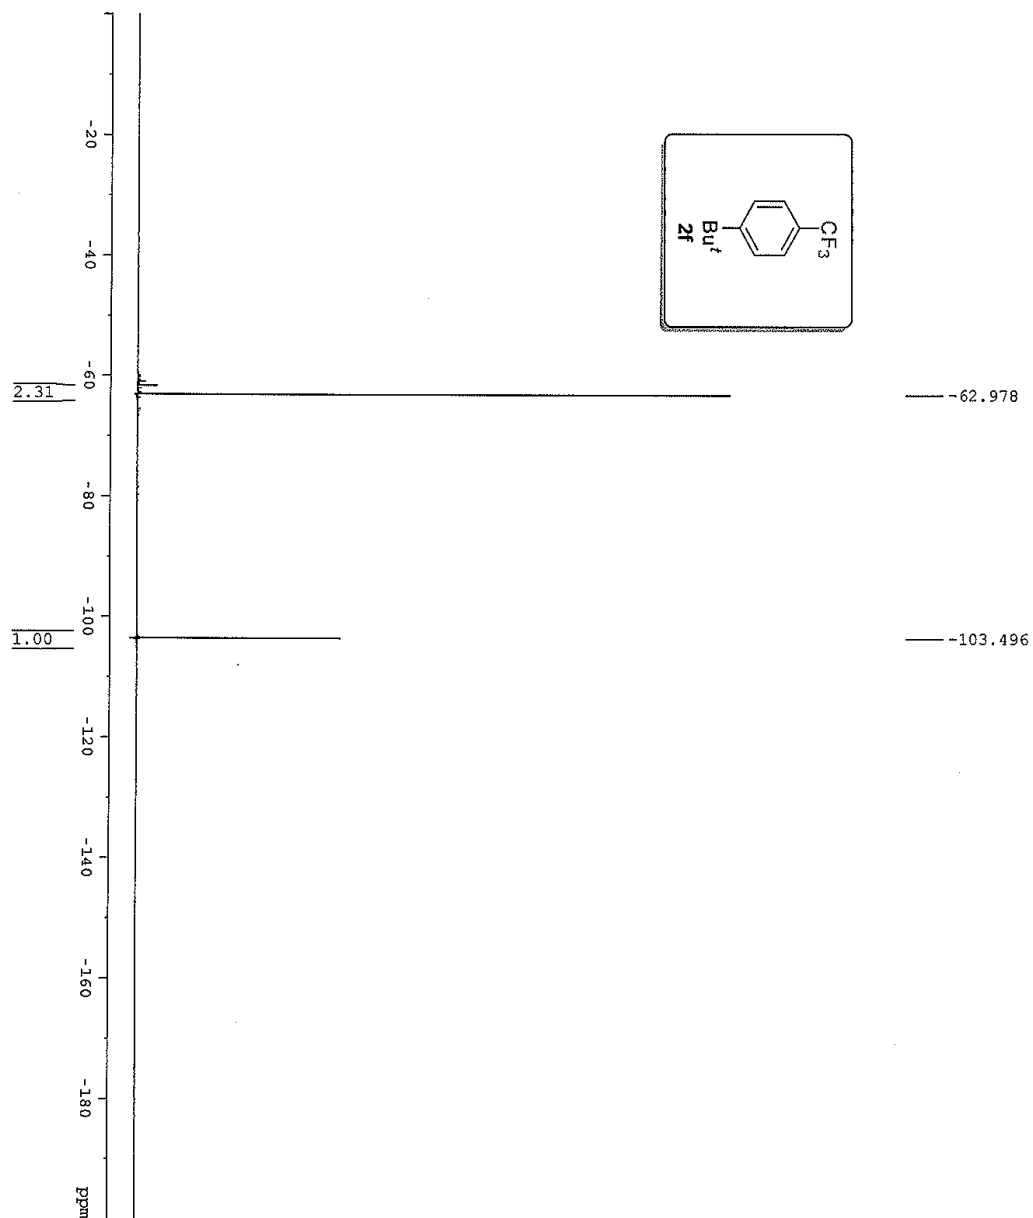

## GC-MS of crude 2g

Analysis : GC-MS  
Sample Name : Sample 1  
Sample ID : [1]-1  
Injection Volume : 3

Sample Information  
Sample Name : GC-MS  
Sample ID : 815/2013 8:50:30 AM  
Sample Type : Unknown  
Sample Name : SC-NSD-1-20  
Sample ID : SC-NSD-1-20  
IS Amount : 1  
Sample Amount : 1  
Injection Volume : 3

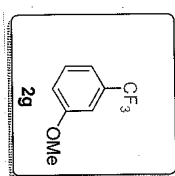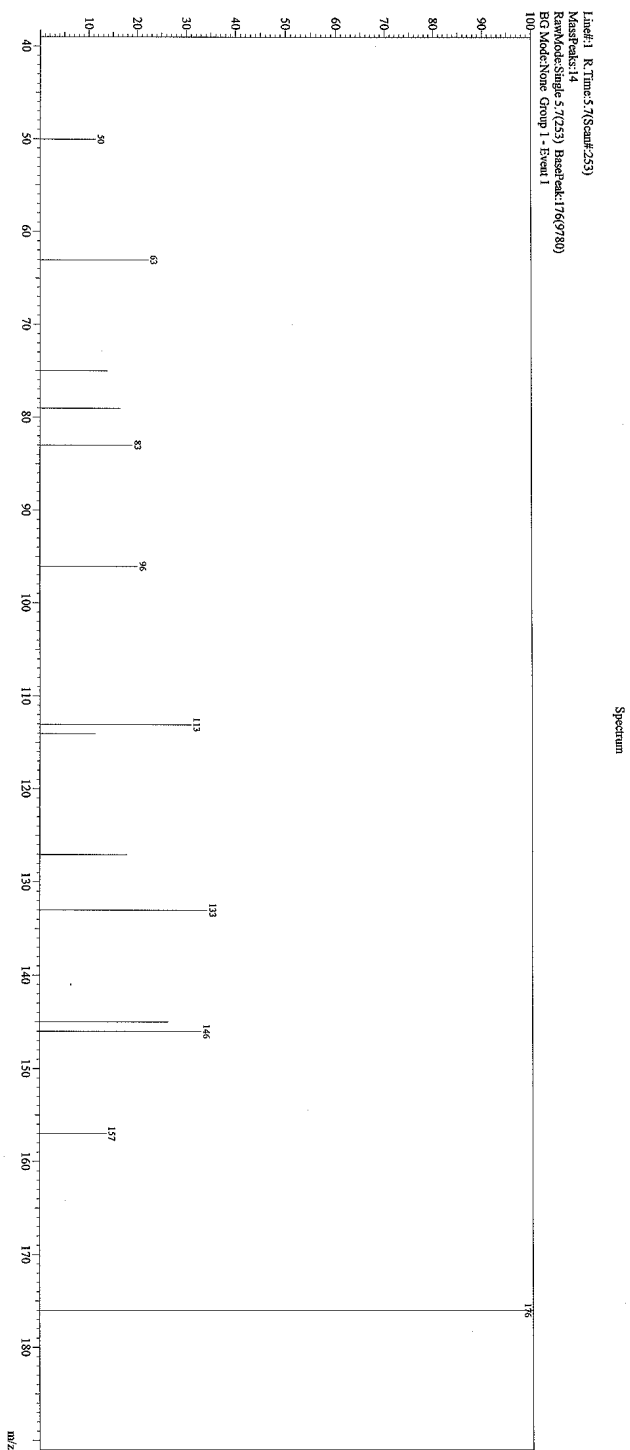



$^{19}\text{F}$  NMR of crude 2g in  $\text{CDCl}_3$

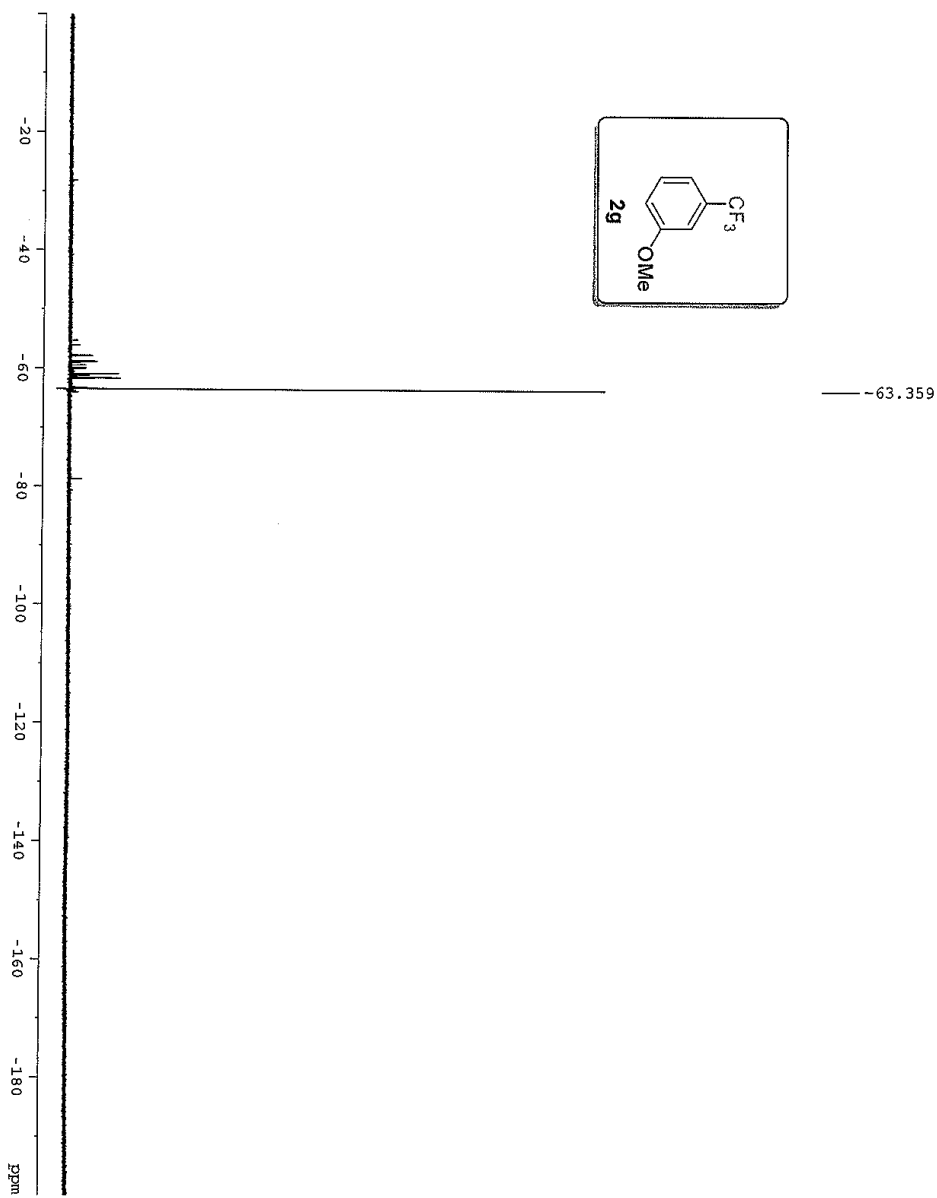

$^{19}\text{F}$  NMR yield of compound **2g**  $(1.78/(1 \times 3) \times 100\% = 60\%)$  in  $\text{CDCl}_3$

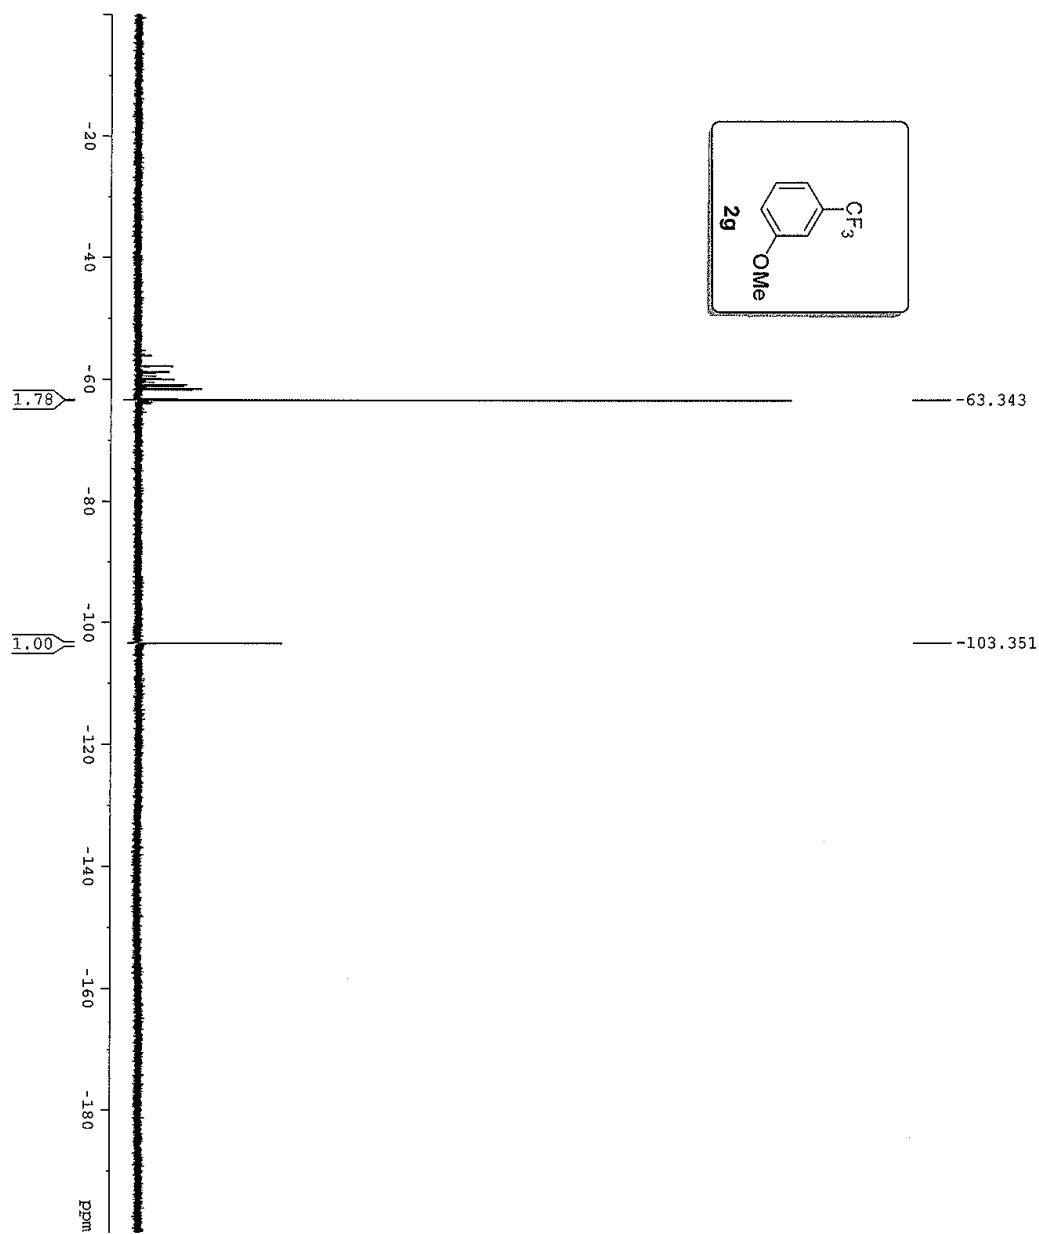

### <sup>1</sup>H NMR of compound 2g

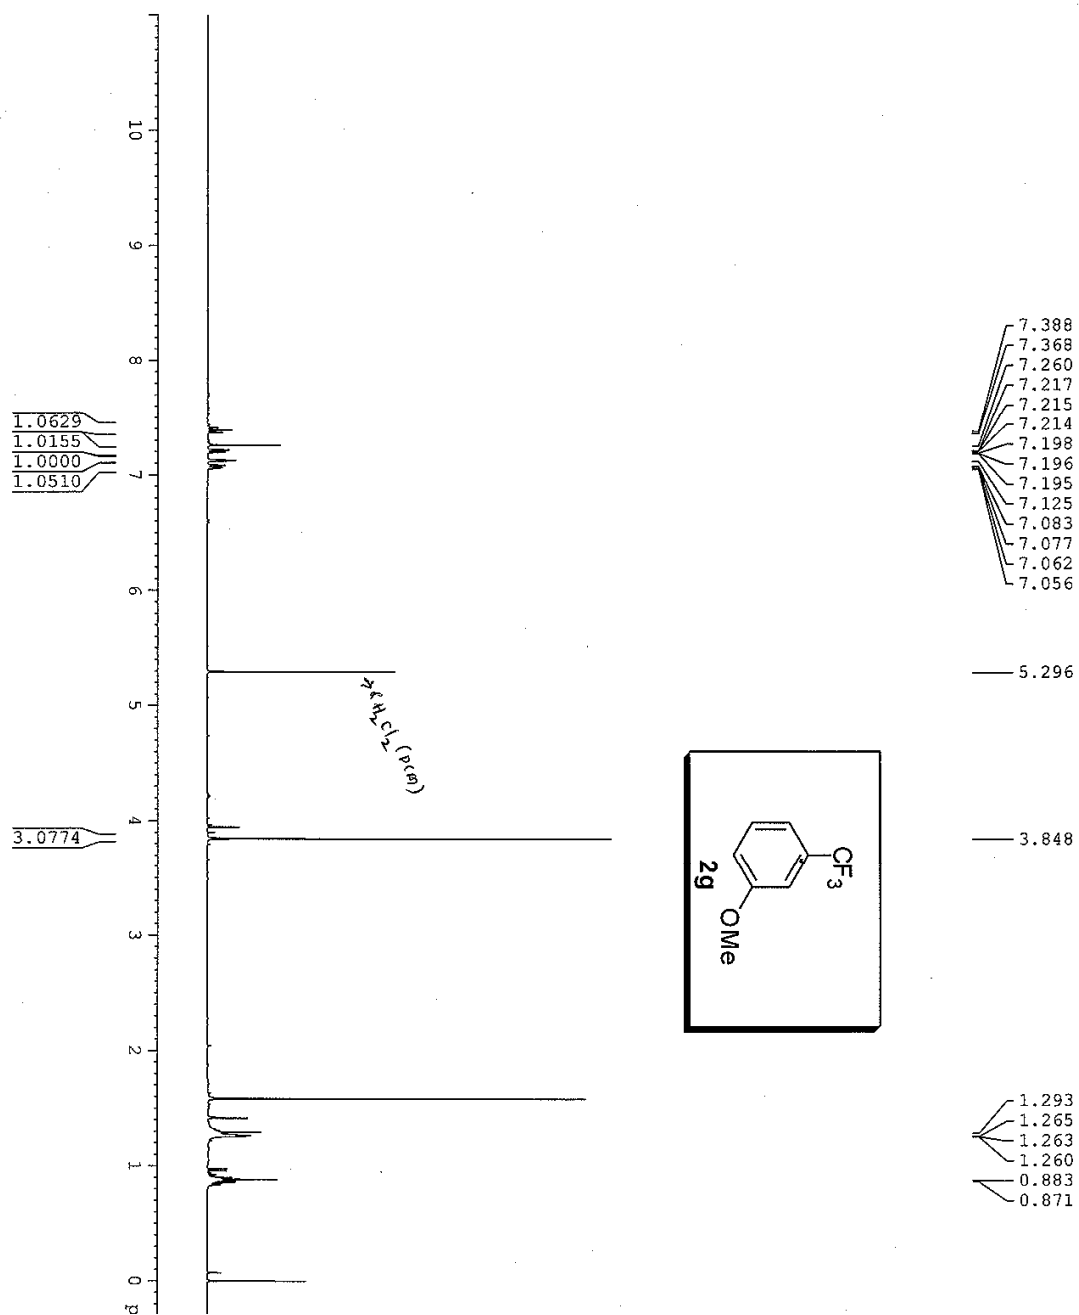

**<sup>19</sup>F NMR of isolated of 2g in CDCl<sub>3</sub>**

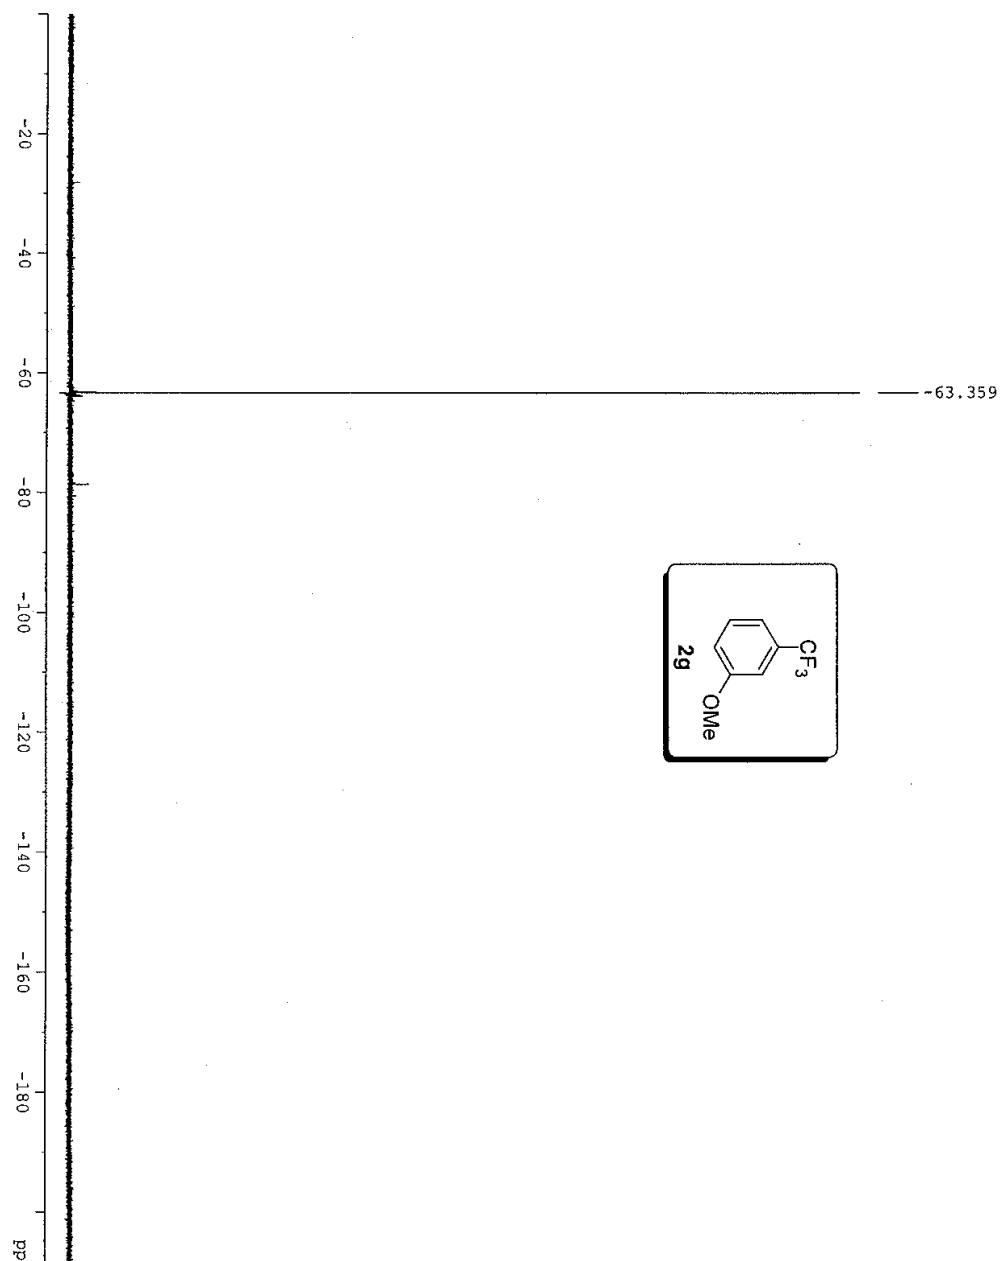

## GC-MS of crude 2h

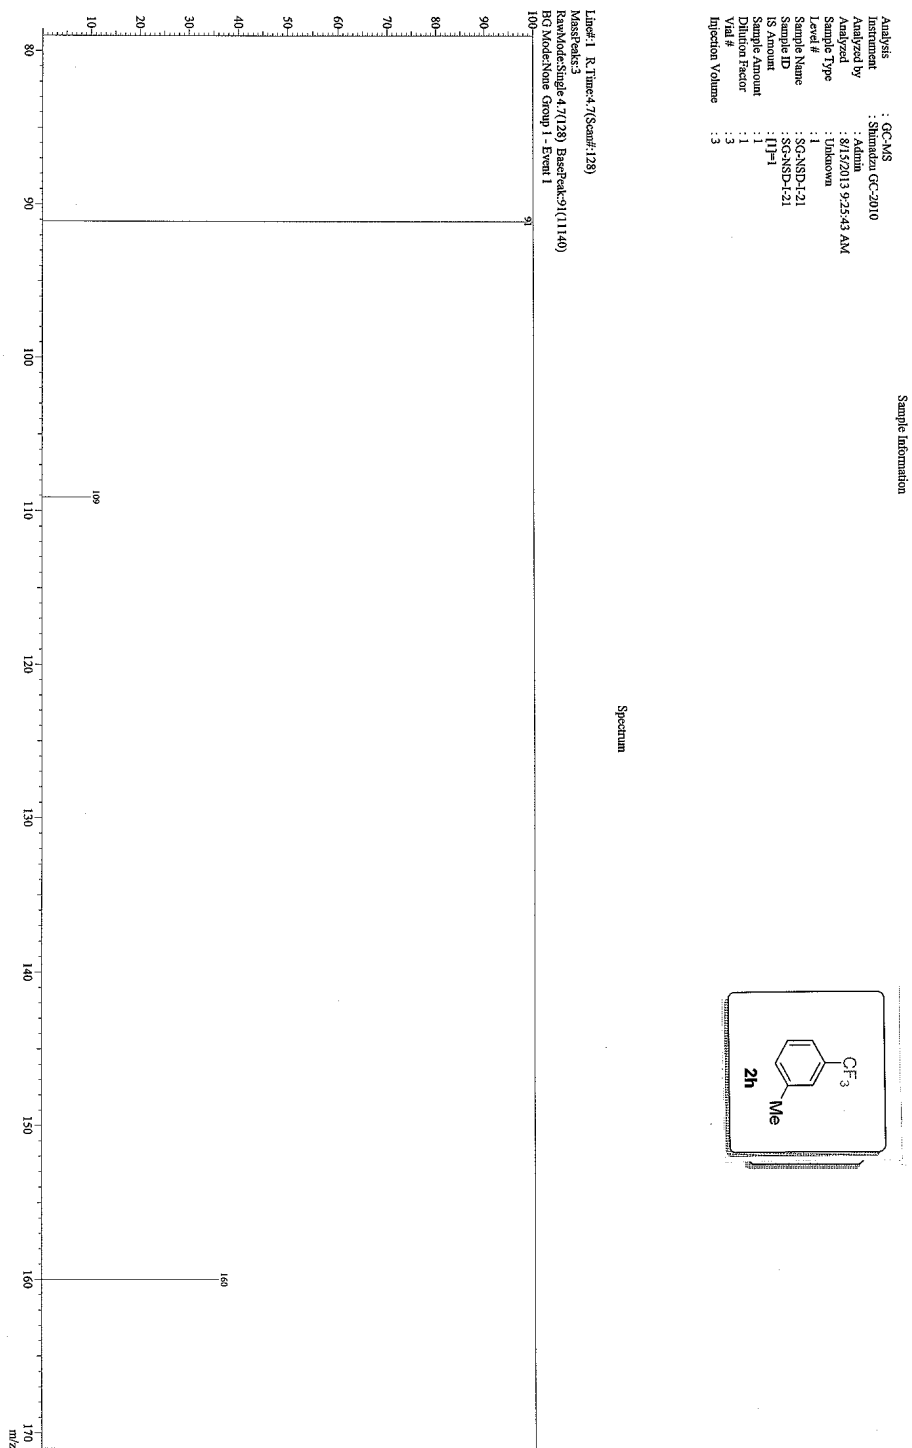

$^{19}\text{F}$  NMR of crude 2h in  $\text{CDCl}_3$

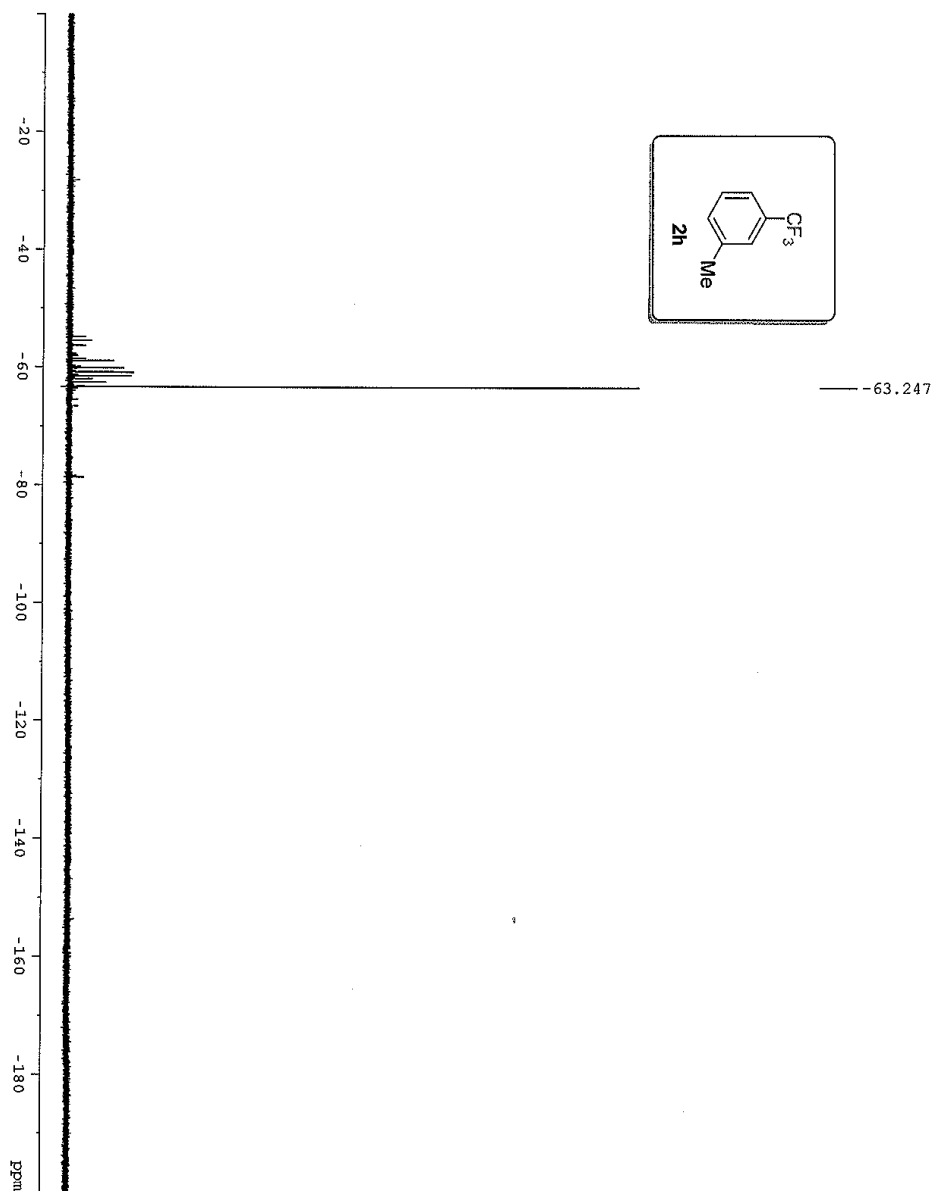

$^{19}\text{F}$  NMR yield of compound 2h  $(1.53/(1 \times 3) \times 100\% = 51\%)$  in  $\text{CDCl}_3$

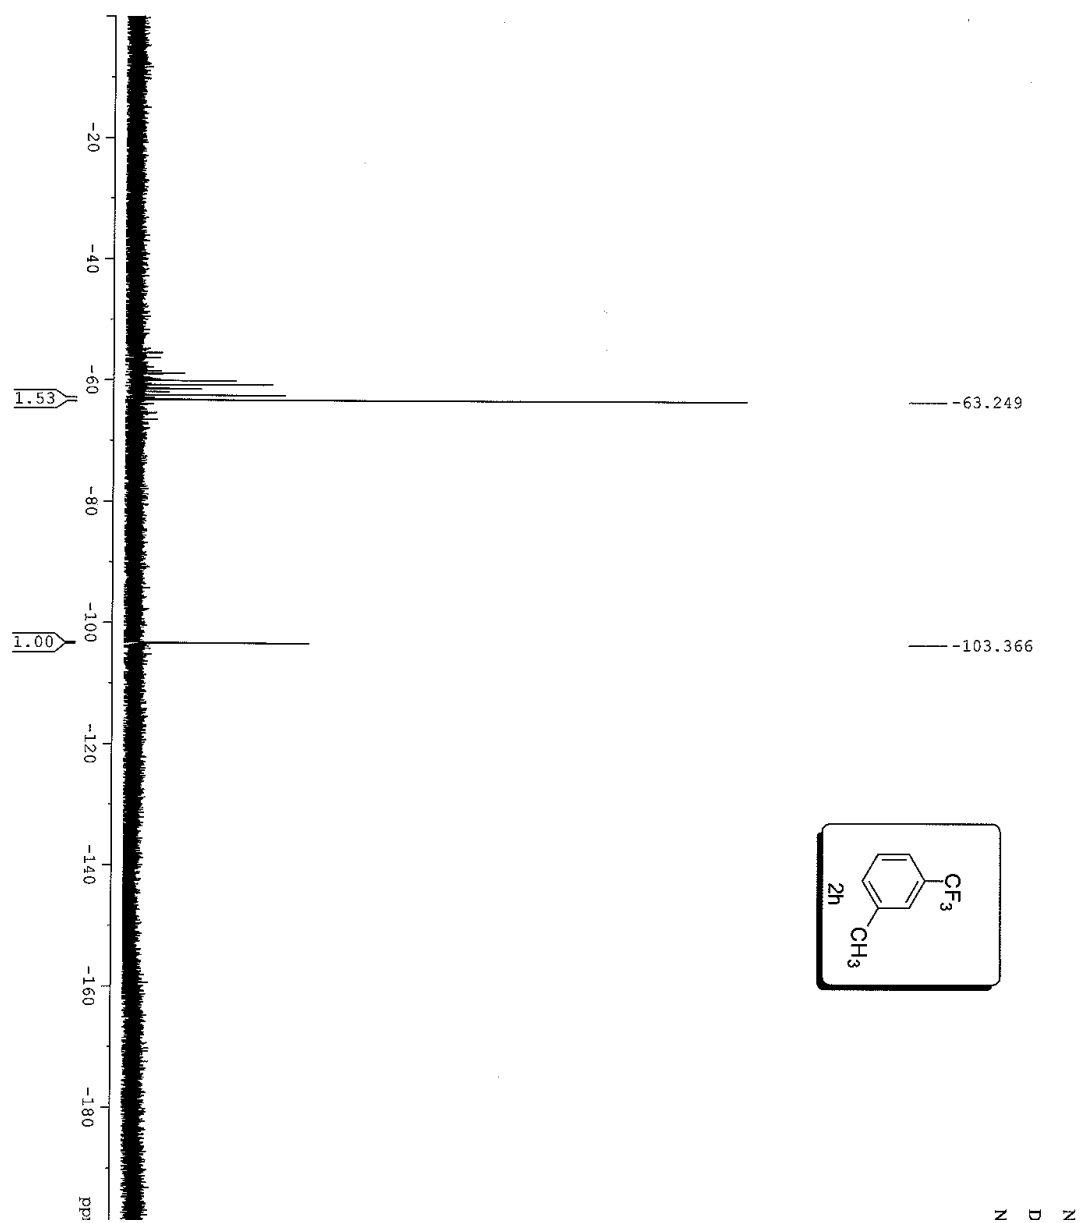

## GC-MS of crude 2i

Sample Information

Analysis : GC-MS  
Instrument : Shimadzu GC-2010  
Analyzed by : Admin  
Analyzed : 8/3/2013 1:11:18 PM  
Sample Type : Unknown  
Level # : 1  
Sample Name : SO-RBS-F-58  
Sample ID : SO-RBS-F-58  
S Parameter : 1171  
S Parameter : 1  
Dilution Factor : 1  
Vial # : 3  
Injection Volume : 3

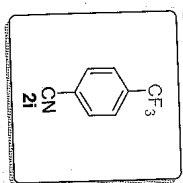

Spectrum

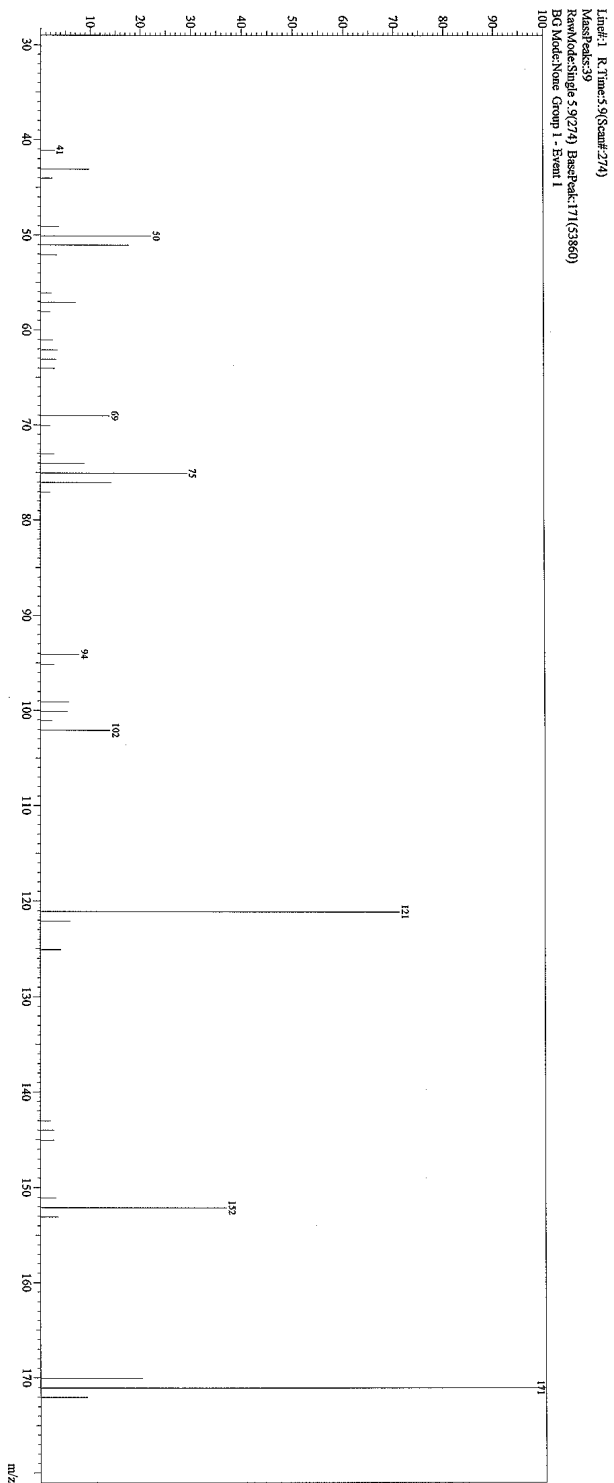



$^{19}\text{F}$  NMR of crude **2i** in  $\text{CDCl}_3$

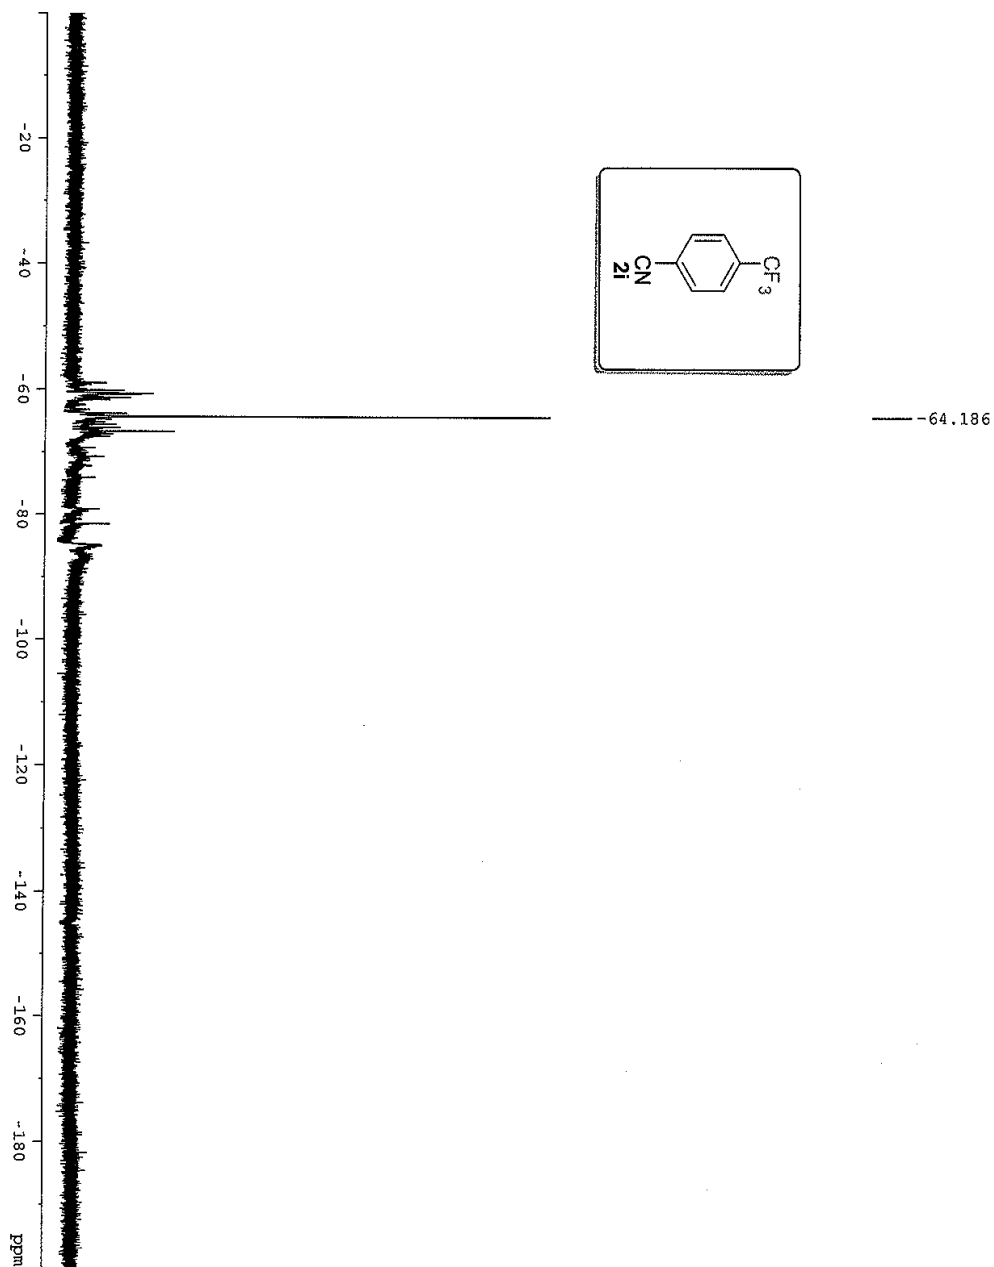

$^{19}\text{F}$  NMR yield of compound **2i** ( $1.21/(1 \times 3) \times 100\% = 40\%$ ) in  $\text{CDCl}_3$

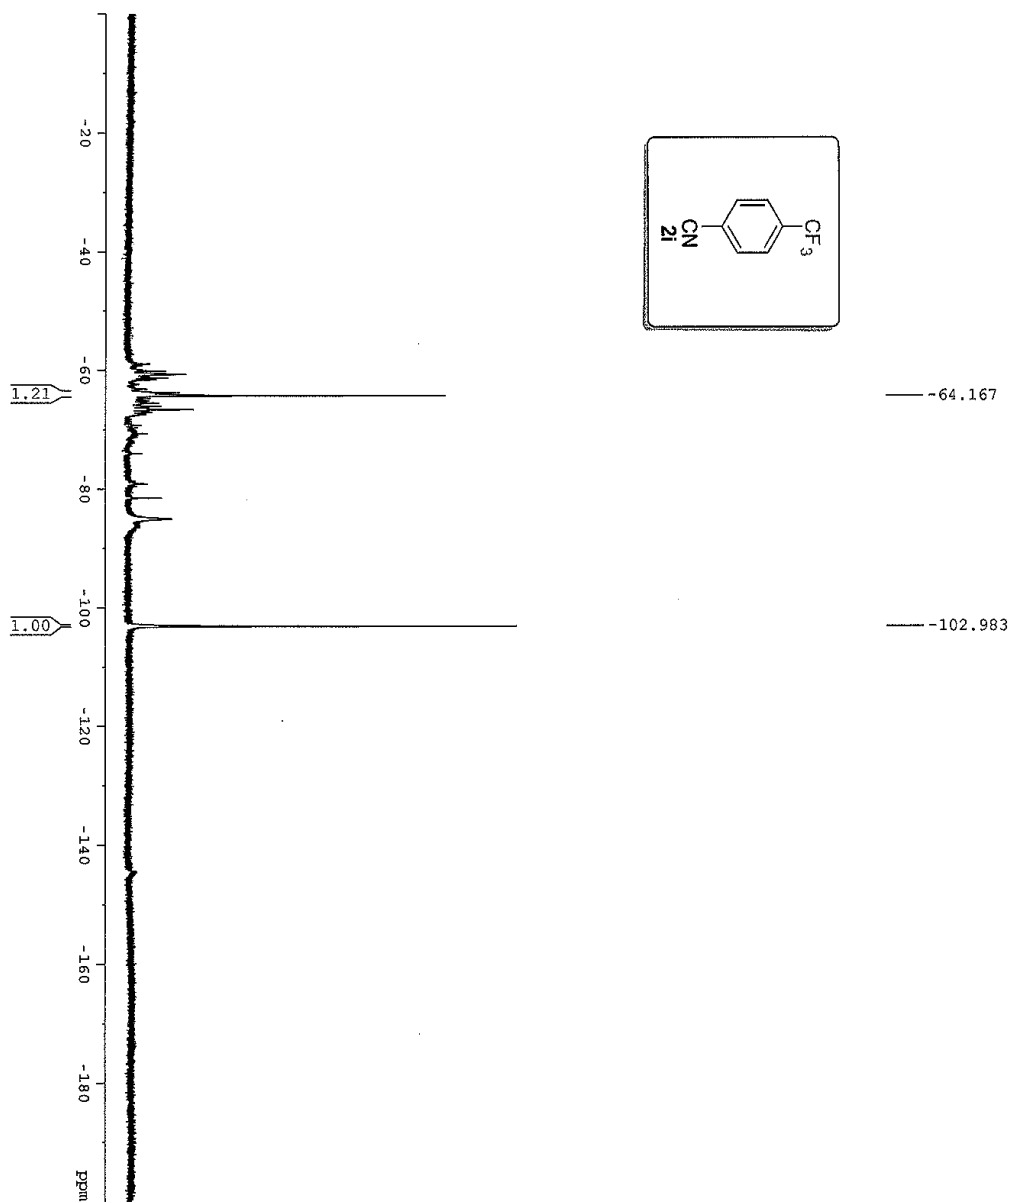

## GC-MS of crude 2j

Analysis : GC-MS  
Instrument : Shimadzu GC-2010  
Analyzed by : Adimu  
Analyzed : 8/2/2013 1:46:42 PM  
Sample Type : Unknown  
Level # : 1  
Sample Name : SG-RBS-F-59  
Sample ID : SG-RBS-F-59  
IS Amount : [1]=1  
Sample Amount : 1  
Dilution Factor : 1  
Vial # : 4  
Injection Volume : 3

### Sample Information

### Spectrum

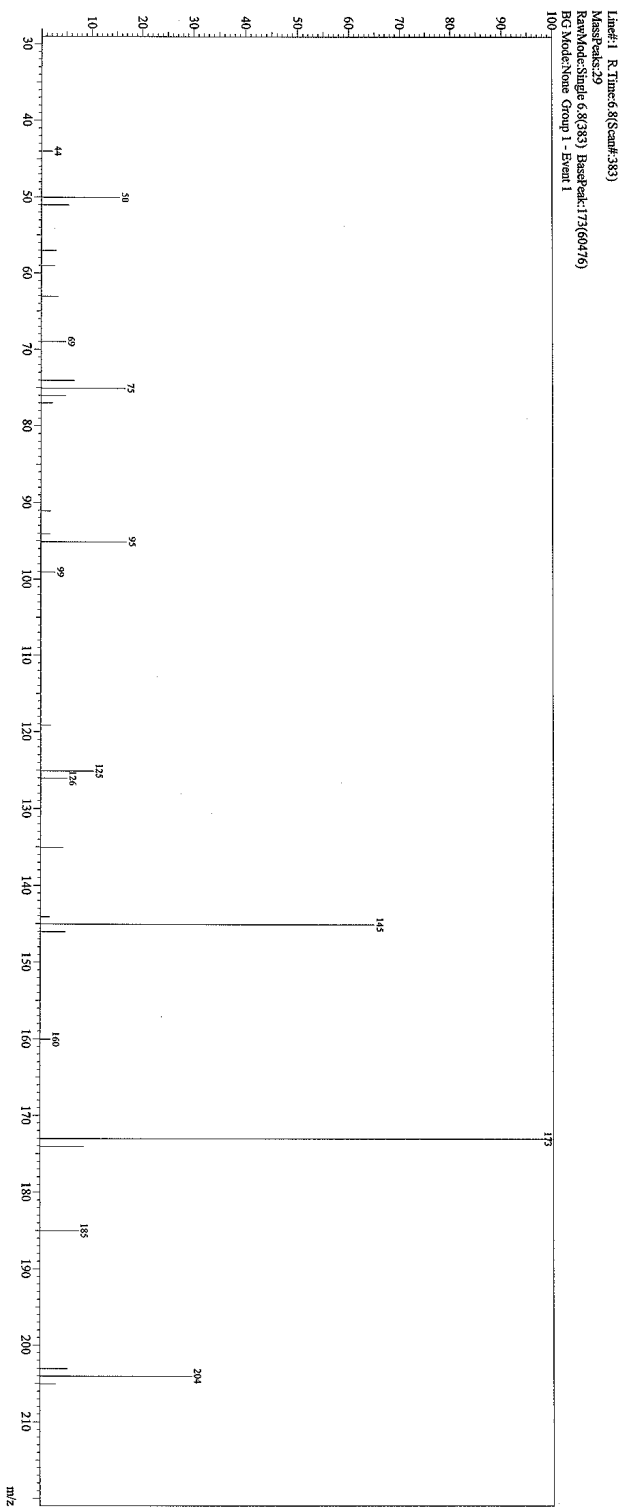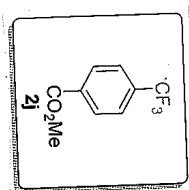

$^{19}\text{F}$  NMR of crude 2j in  $\text{CDCl}_3$

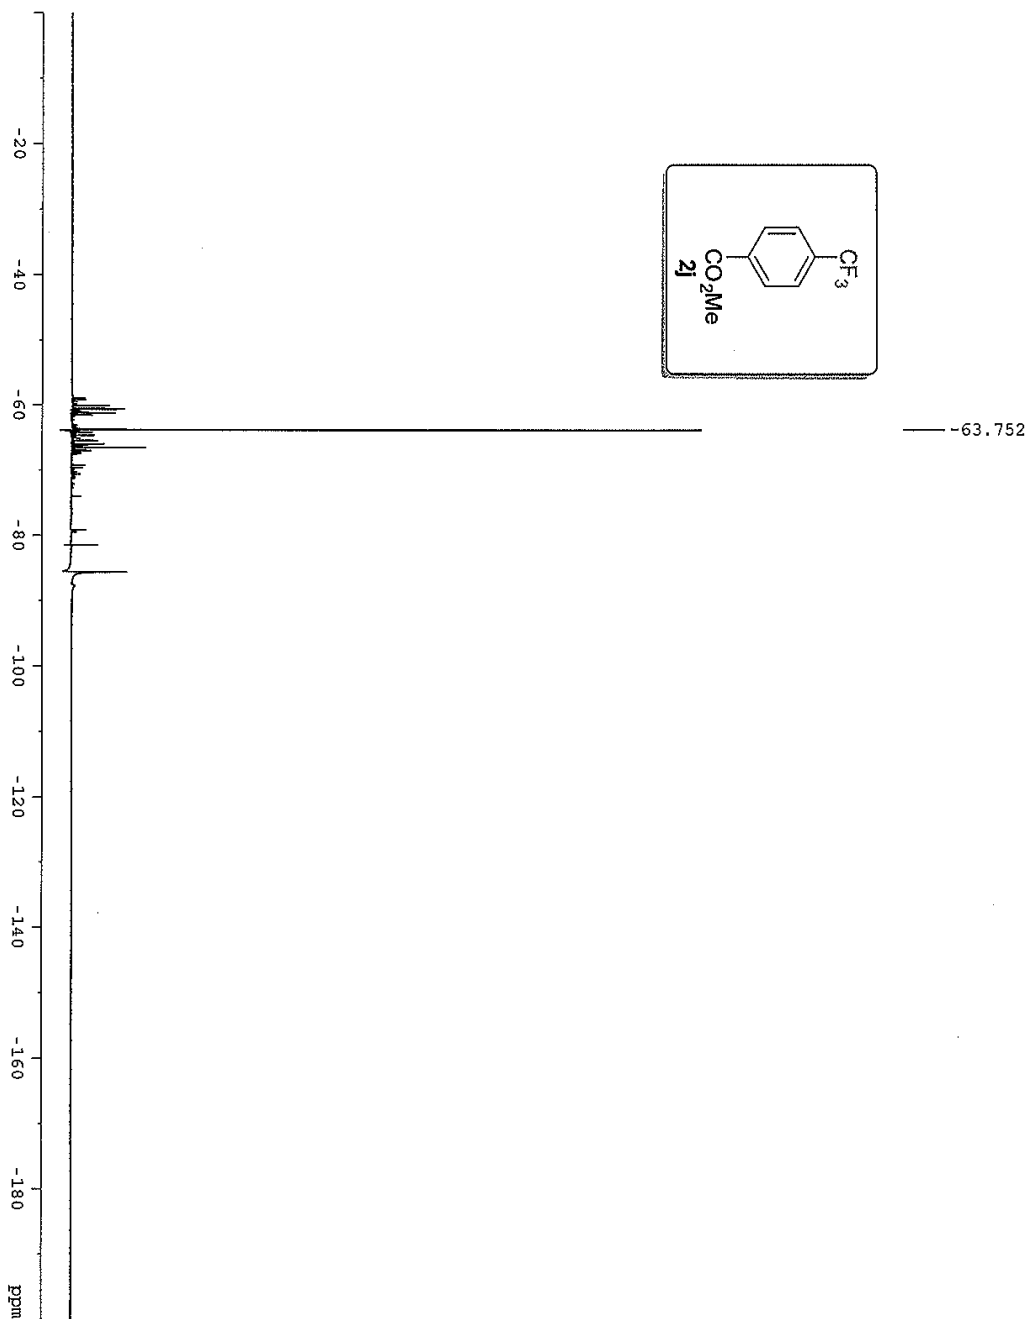

$^{19}\text{F}$  NMR yield of compound **2j** ( $1.24/(1 \times 3) \times 100\% = 41\%$ ) in  $\text{CDCl}_3$

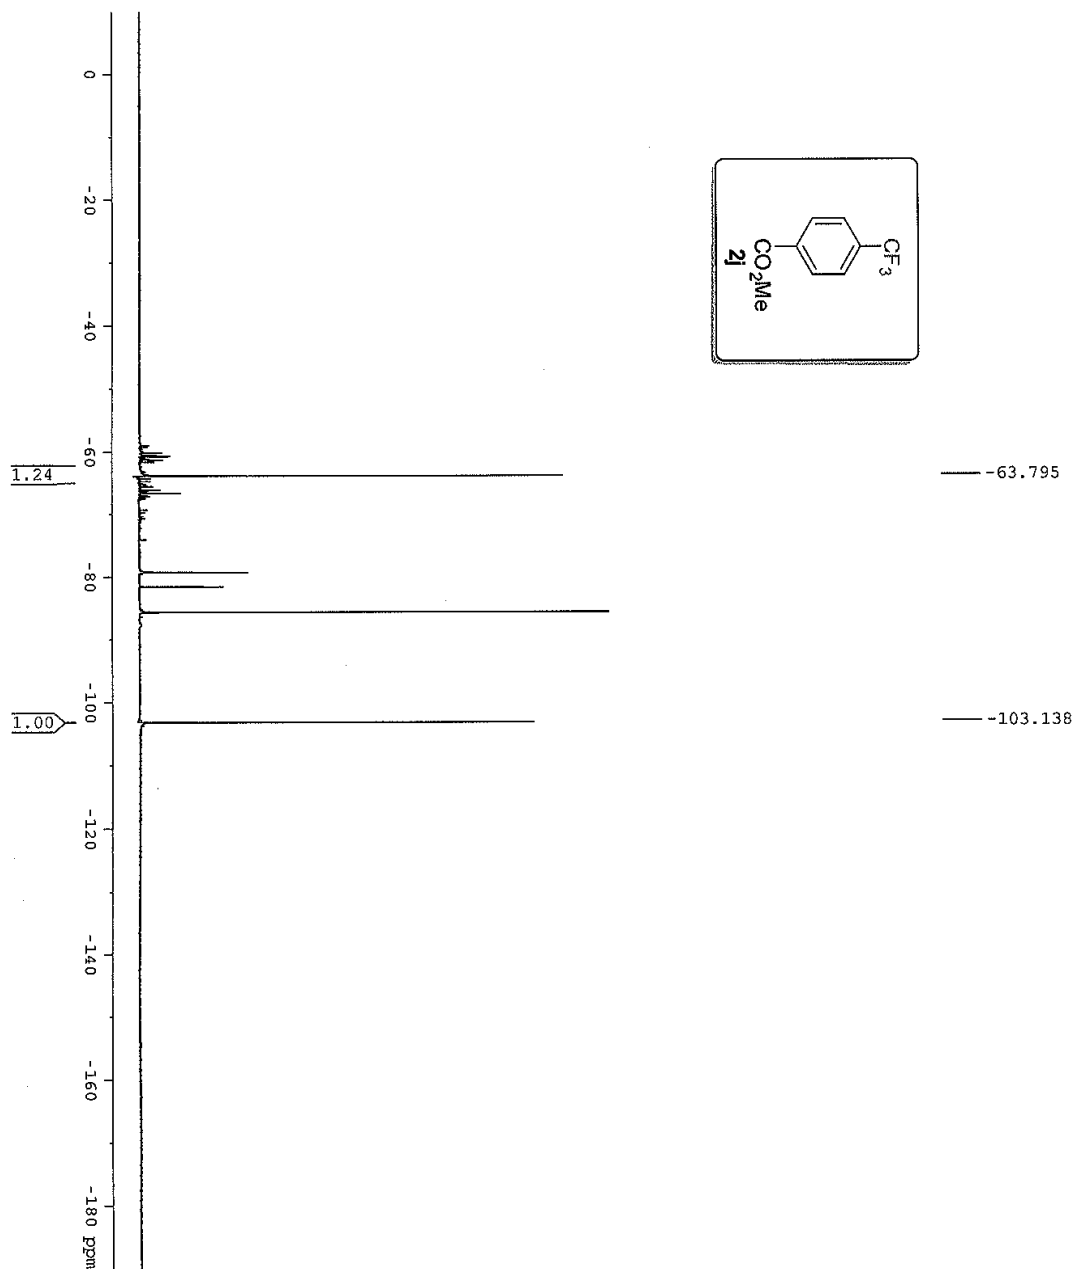

## GC-MS of crude 2l

Sample Information

Analysis : GC-MS  
Instrument : Shimadzu GC-2010  
Analyzed by : Admin  
Analyzed : 07/2013 10:37:28 AM  
Sample Type : Unknown  
Injection # : 1  
Sample Name : SCANSD-4-12-1  
Sample ID : SCANSD-4-12-1  
IS Amount : [1]=1  
Sample Amount : 1  
Dilution Factor : 1  
Vial # : 2  
Injection Volume : 3

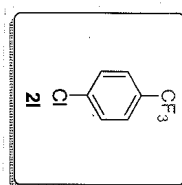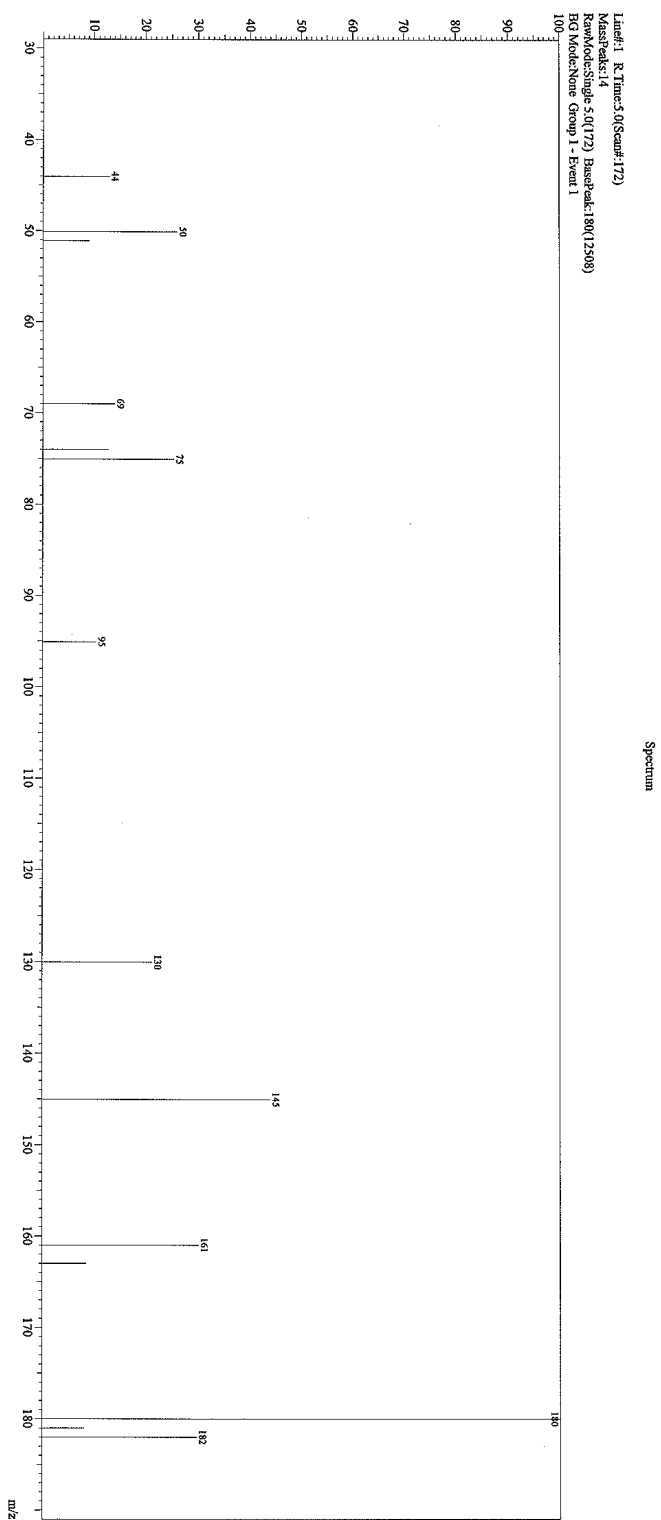

$^{19}\text{F}$  NMR of crude 2l in  $\text{CDCl}_3$

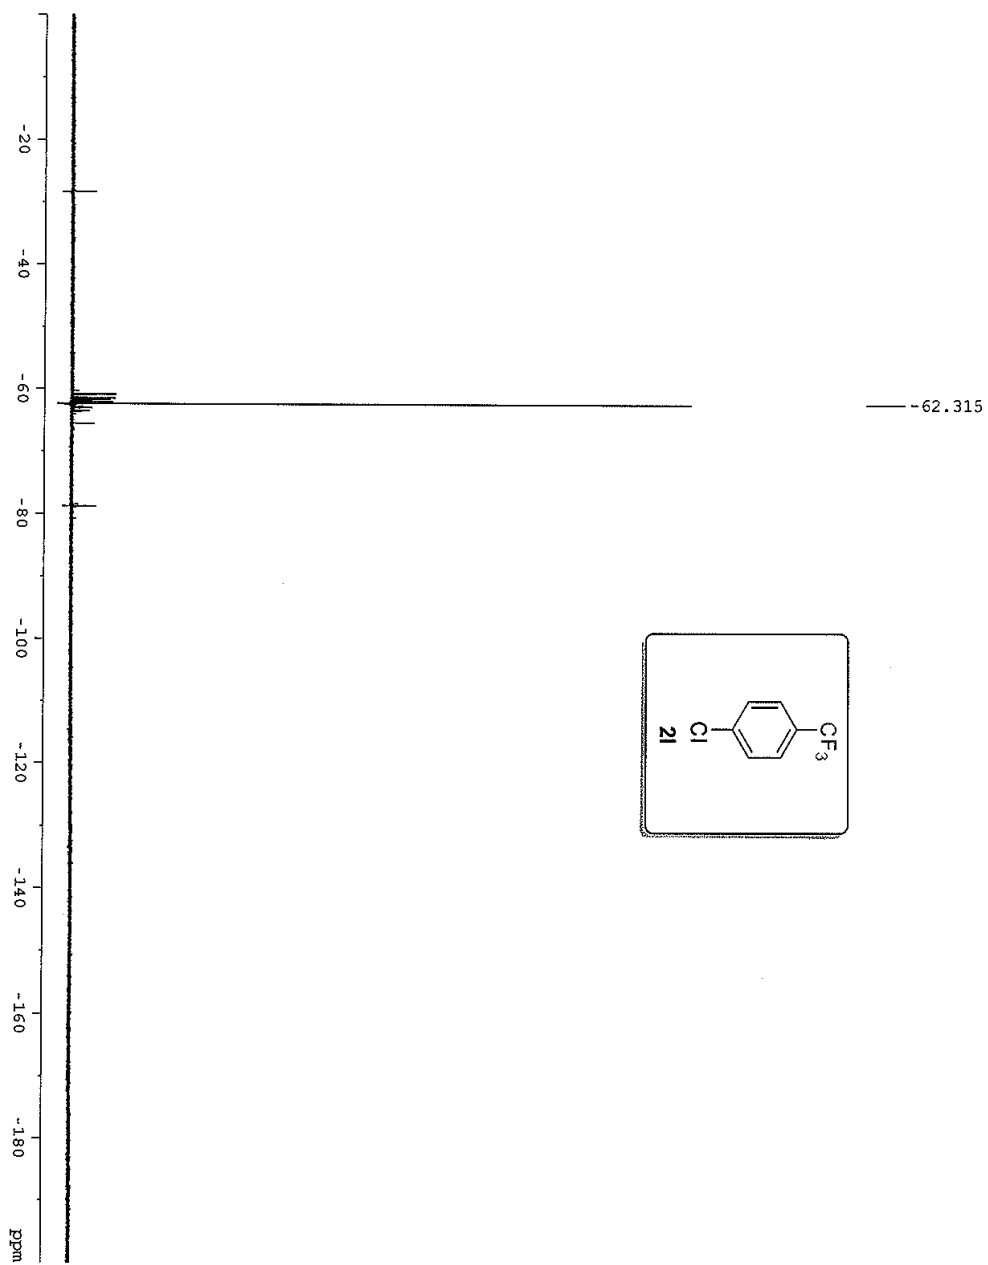

$^{19}\text{F}$  NMR yield of compound 2l ( $1.24/(1 \times 3) \times 100\% = 41\%$ ) in  $\text{CDCl}_3$

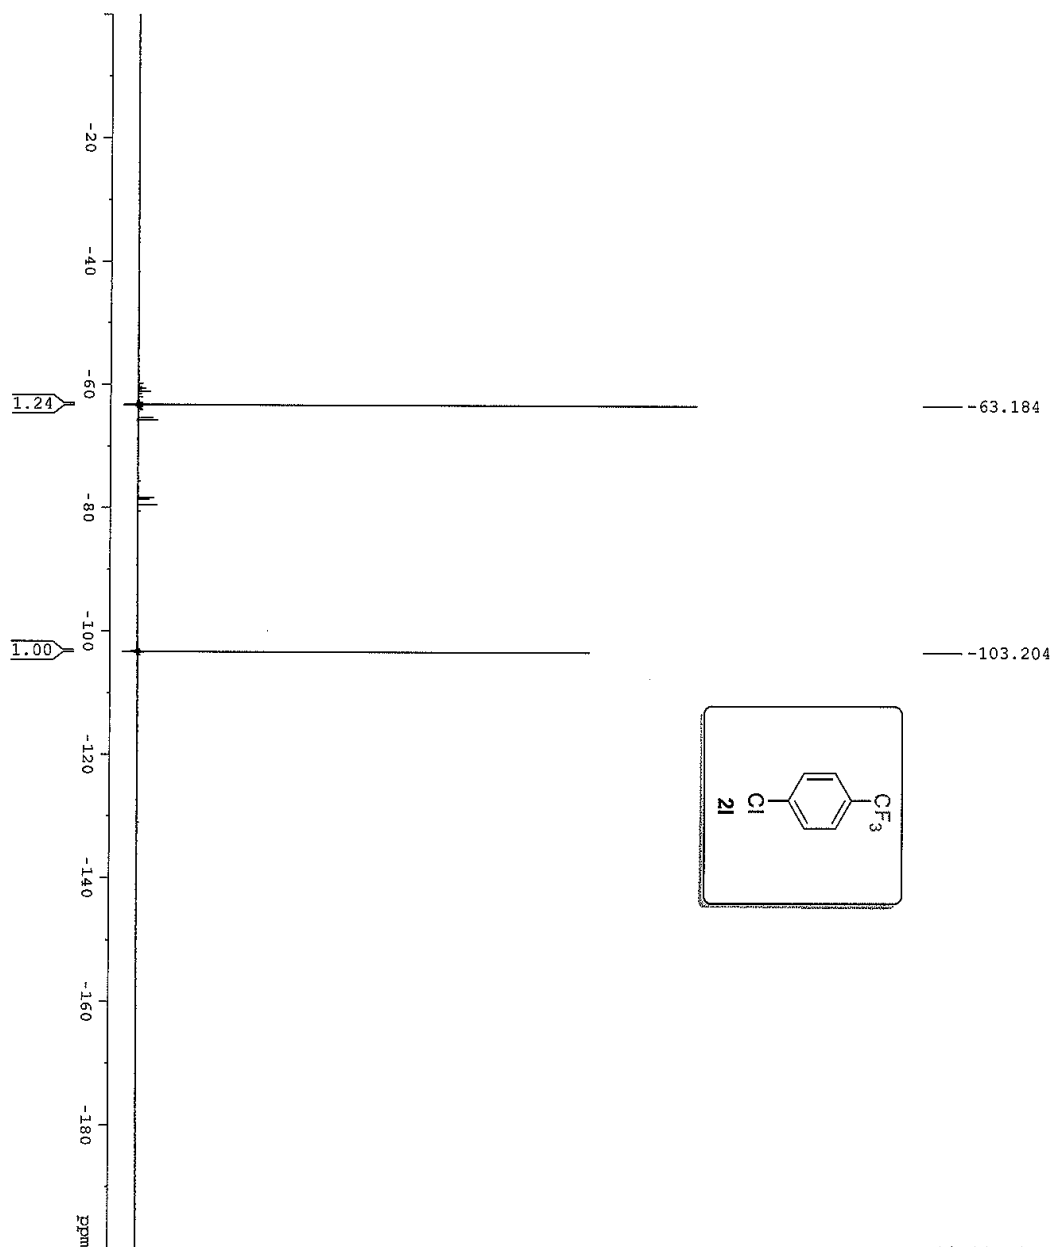



### GC-MS of crude 2m

Sample Information

|                  |                        |
|------------------|------------------------|
| Analysis         | : GC-MS                |
| Instrument       | : Shimadzu GC-2010     |
| Analyzed by      | : Admin                |
| Analyzed         | : 8/19/2013 3:14:05 PM |
| Sample Type      | : Unknown              |
| Level #          | : 1                    |
| Sample Name      | : S-GA-MS-1-23         |
| Sample ID        | : S-GA-MS-1-23         |
| S Number         | : 1171                 |
| Sample Amount    | : 1                    |
| Dilution Factor  | : 1                    |
| Vial #           | : 4                    |
| Injection Volume | : 3                    |

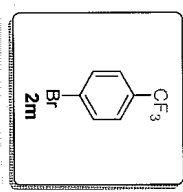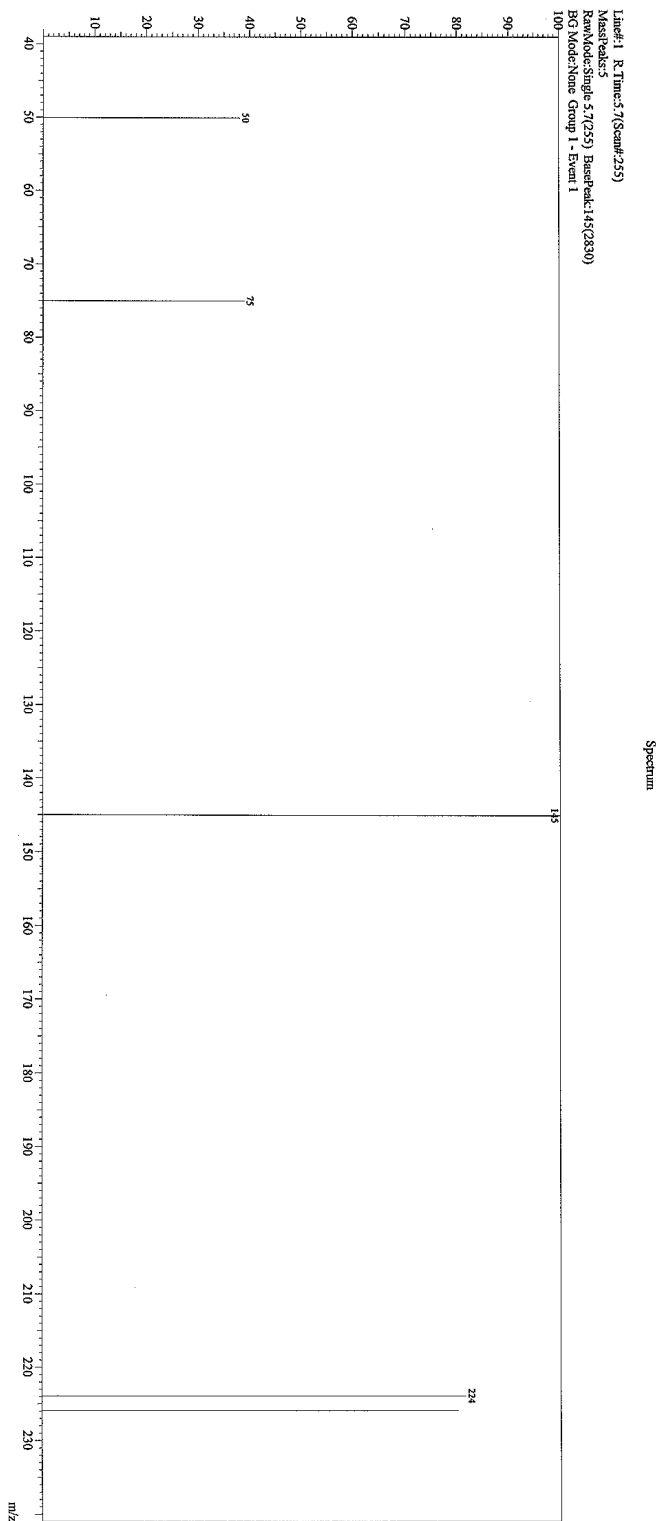

$^{19}\text{F}$  NMR of crude 2m in  $\text{CDCl}_3$

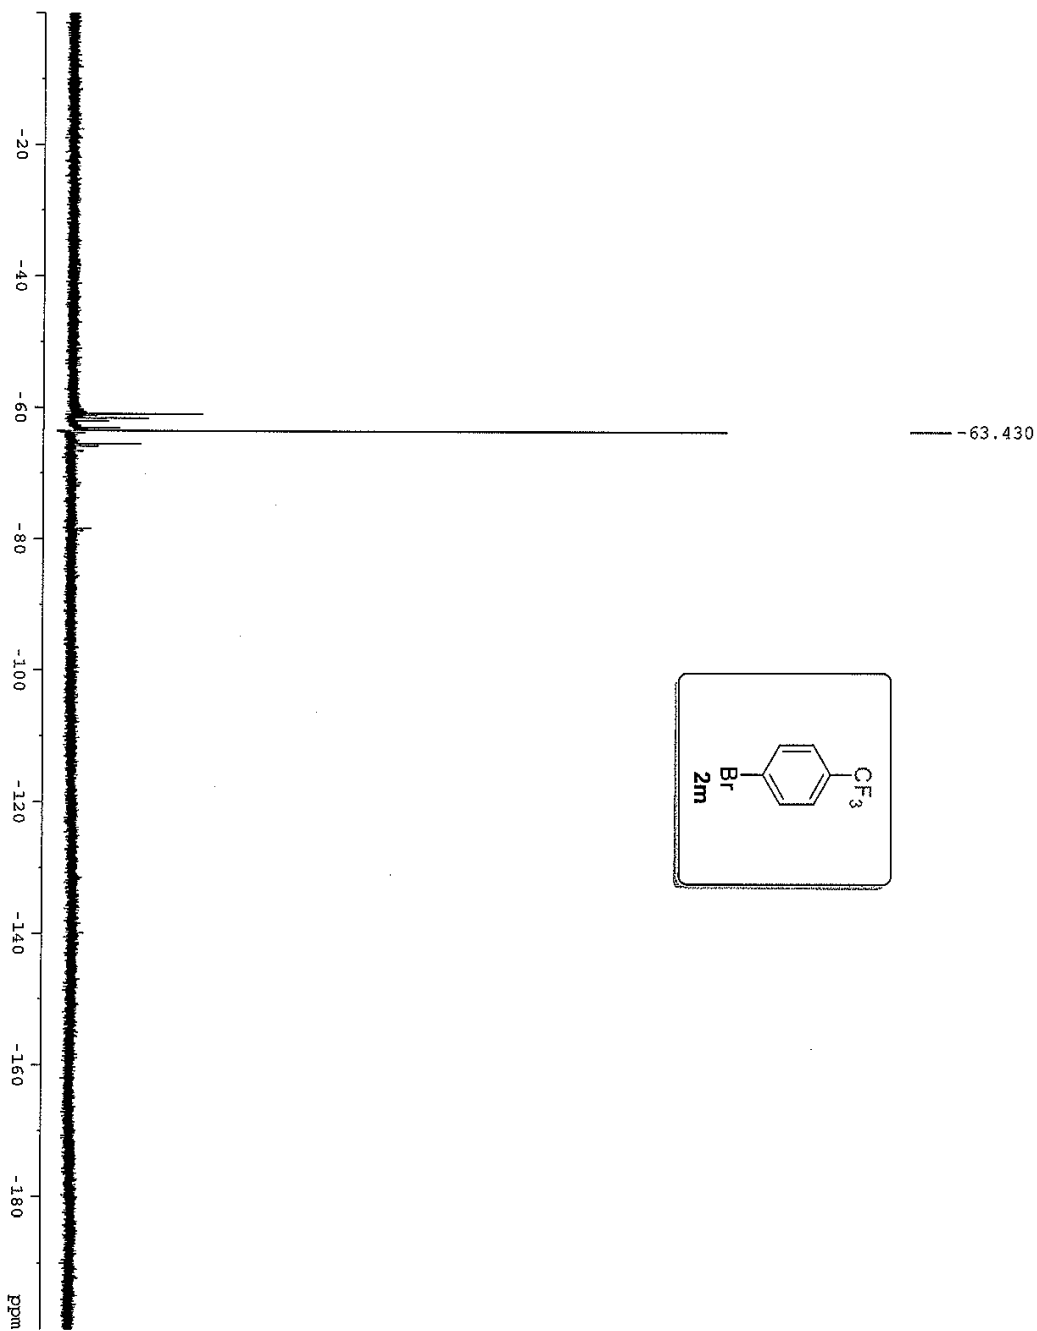

$^{19}\text{F}$  NMR yield of compound **2m** ( $1.70/(1 \times 3) \times 100\% = 57\%$ ) in  $\text{CDCl}_3$

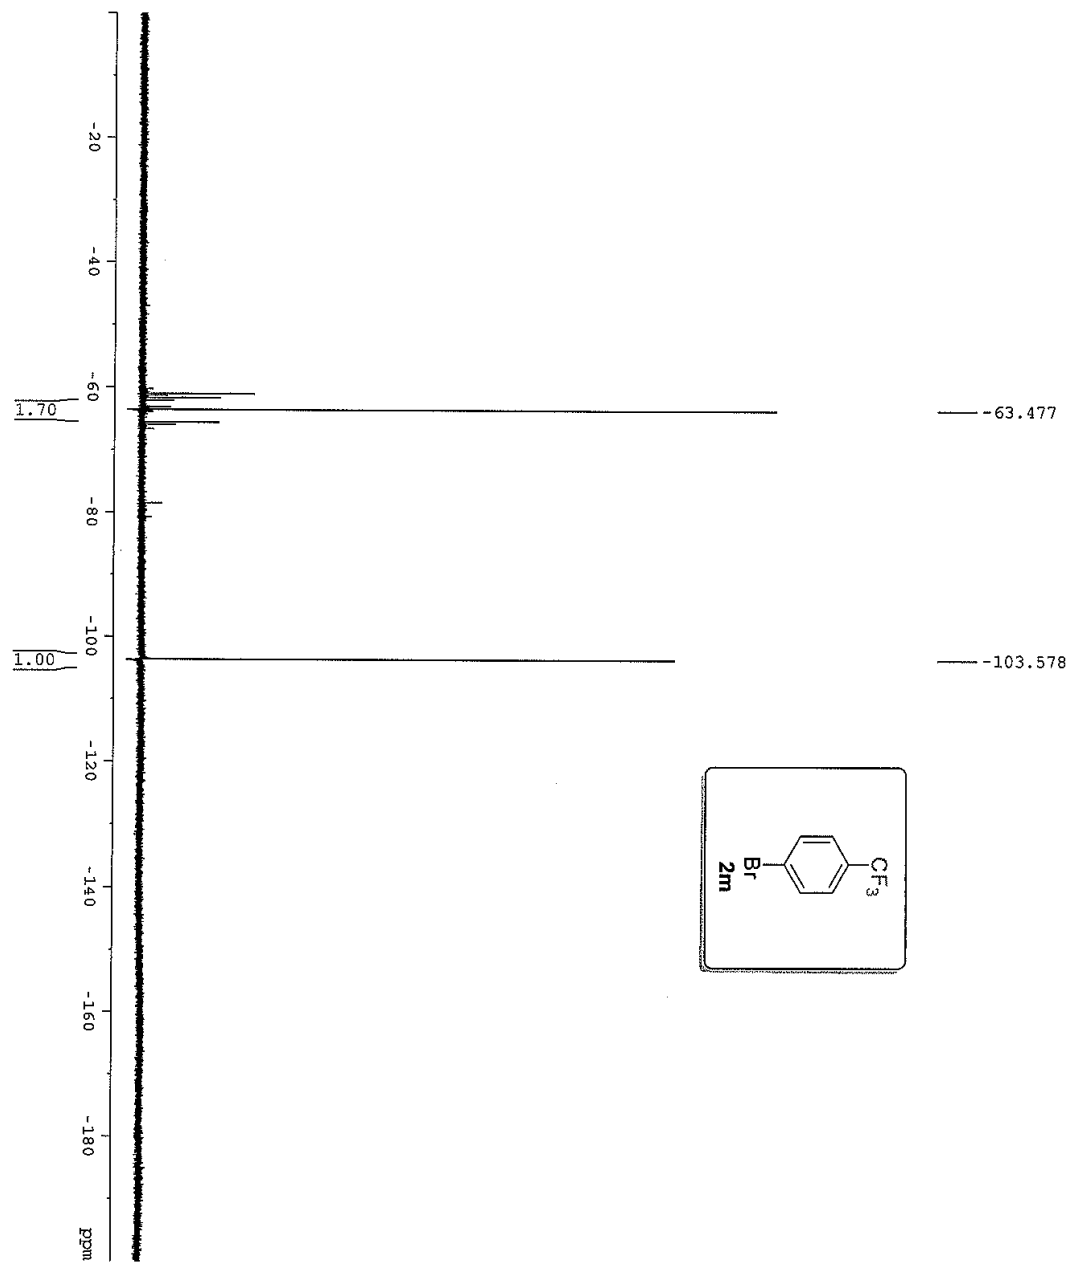

## GC-MS of crude 2n

Sample Information

Analysis : GC-MS  
Instrument : Shimadzu GC-2010  
Analyzed by : Adam  
Analyzed : 8/3/2013 2:22:02 PM  
Sample Type : Unknown  
Level #: 1  
Sample Name : SG-ANS-1-8  
Sample ID : SG-ANS-1-8  
S Amount : [1]-1  
Sample Amount : 1  
Dilution Factor : 1  
Vial #: 5  
Injection Volume : 3

Spectrum

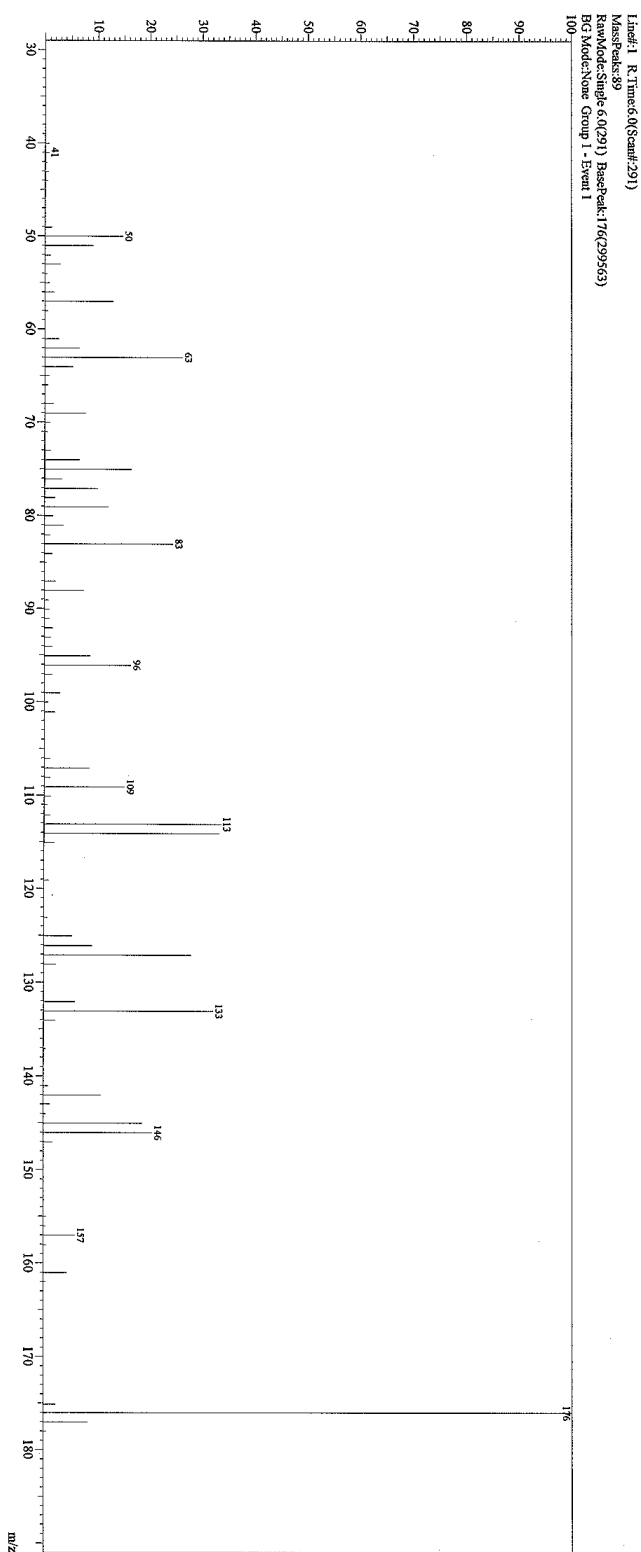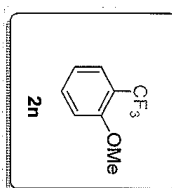

$^{19}\text{F}$  NMR of crude **2n** in  $\text{CDCl}_3$

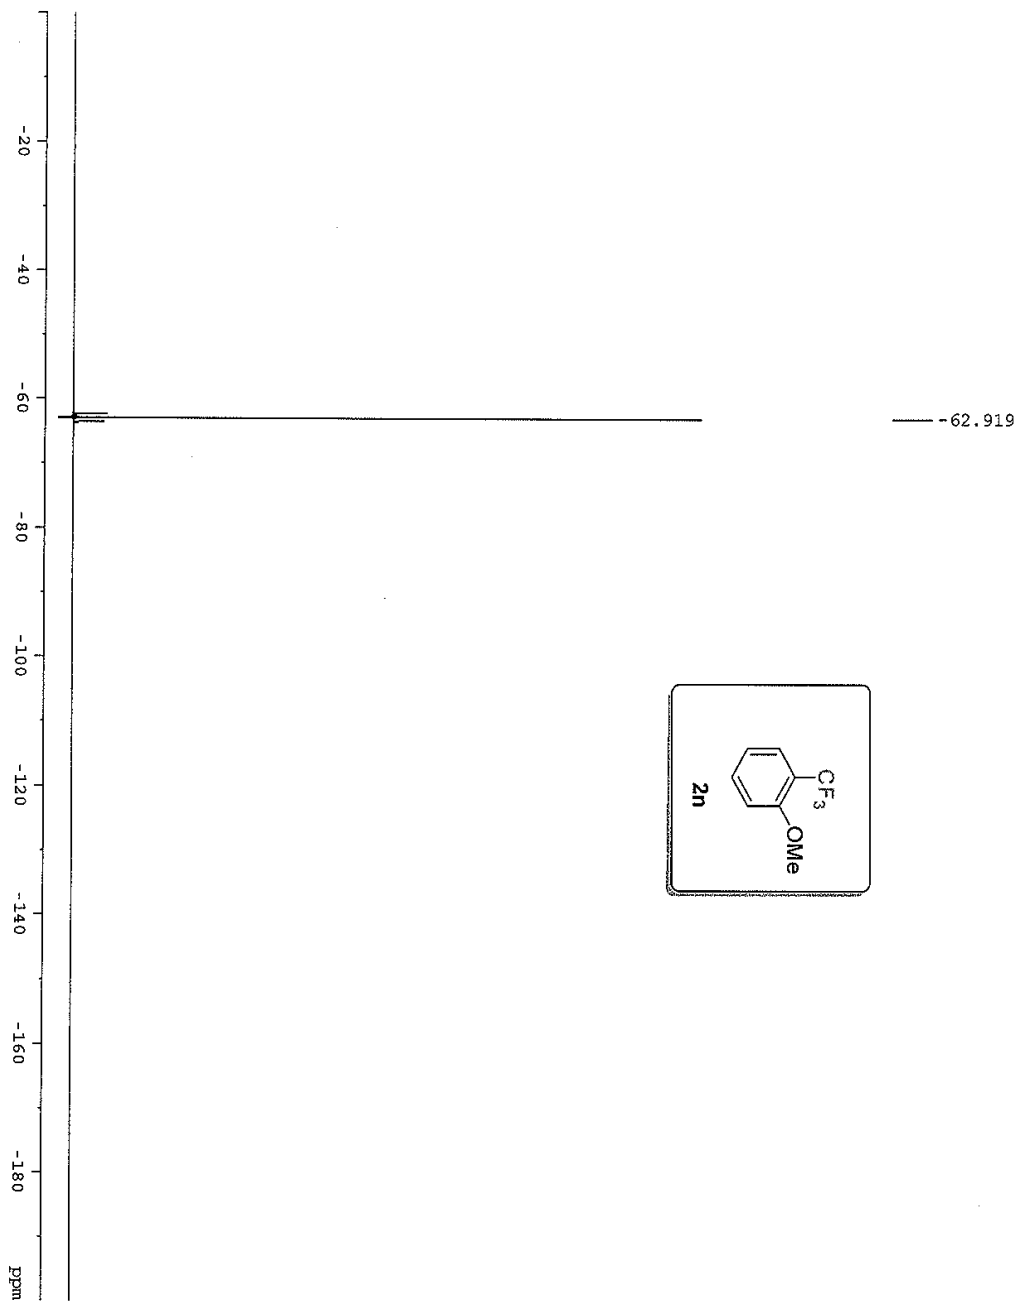

$^{19}\text{F}$  NMR yield of compound **2n** ( $2.68/(1 \times 3) \times 100\% = 89\%$ ) in  $\text{CDCl}_3$

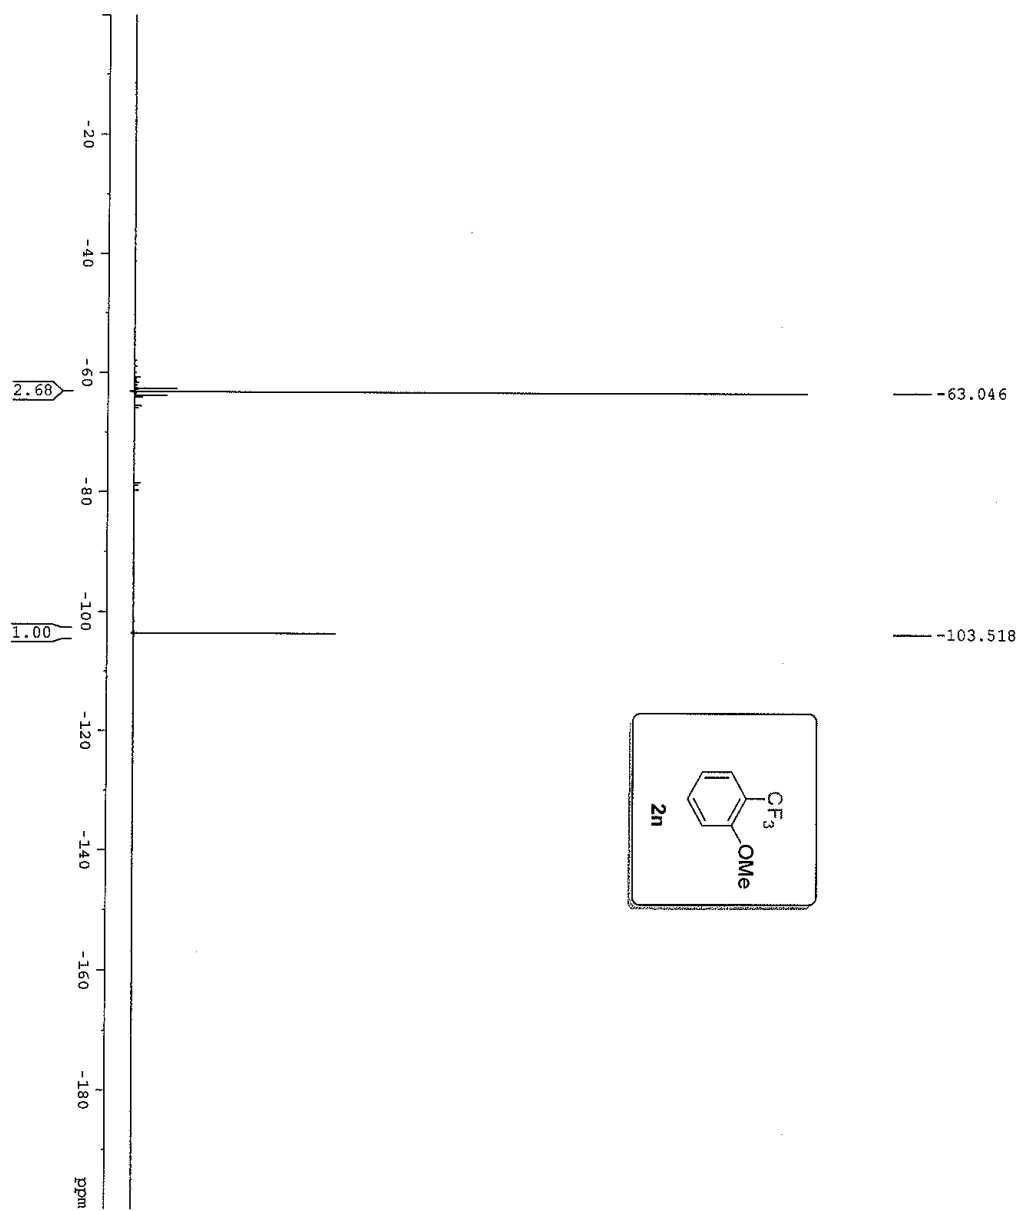

$^1\text{H}$  NMR of 2n in  $\text{CDCl}_3$

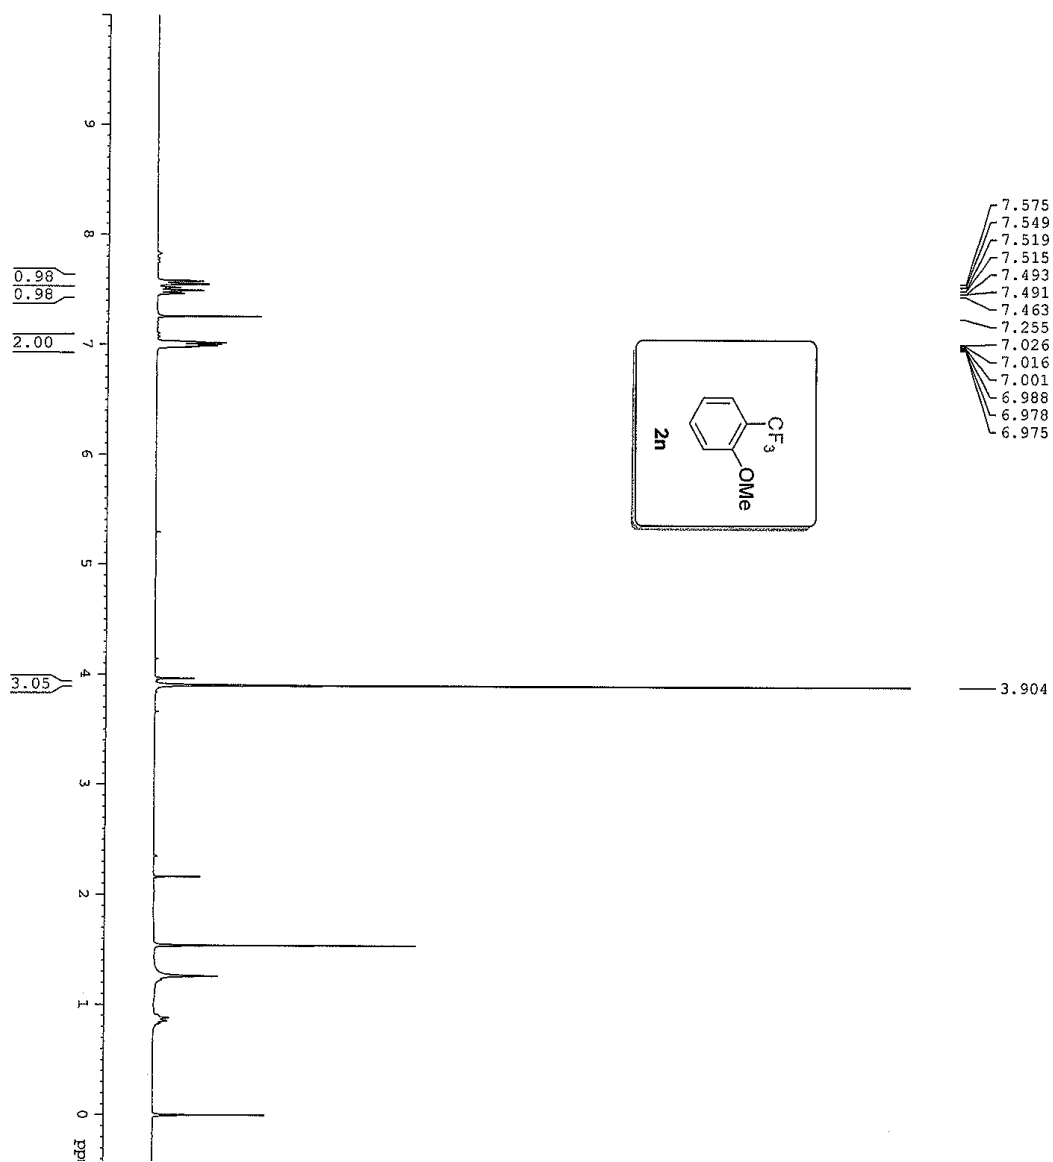

$^{13}\text{C}$  NMR of 2n in  $\text{CDCl}_3$

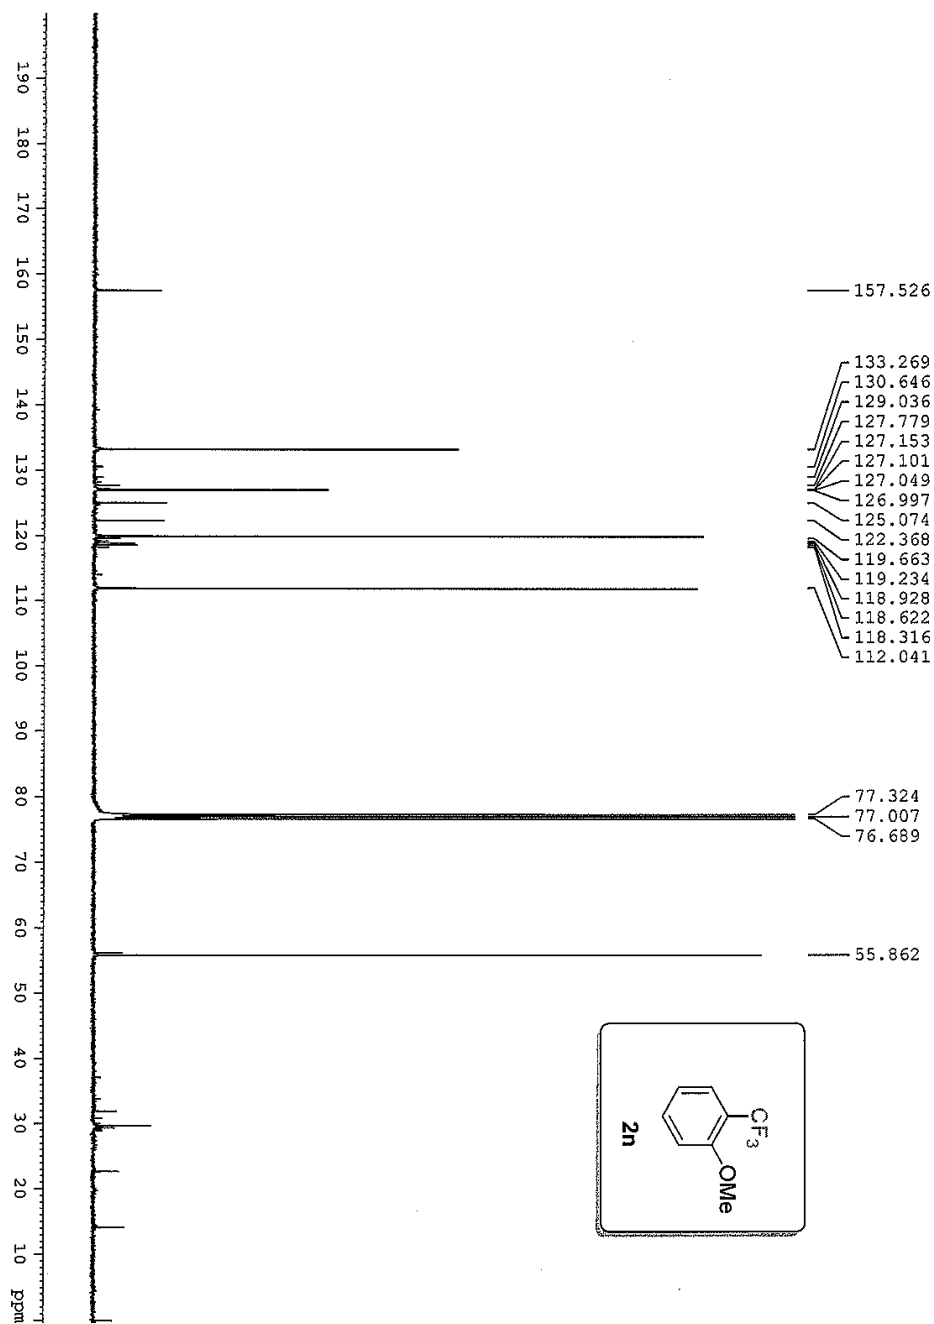



**$^{19}\text{F}$  NMR of isolated 2n in  $\text{CDCl}_3$**

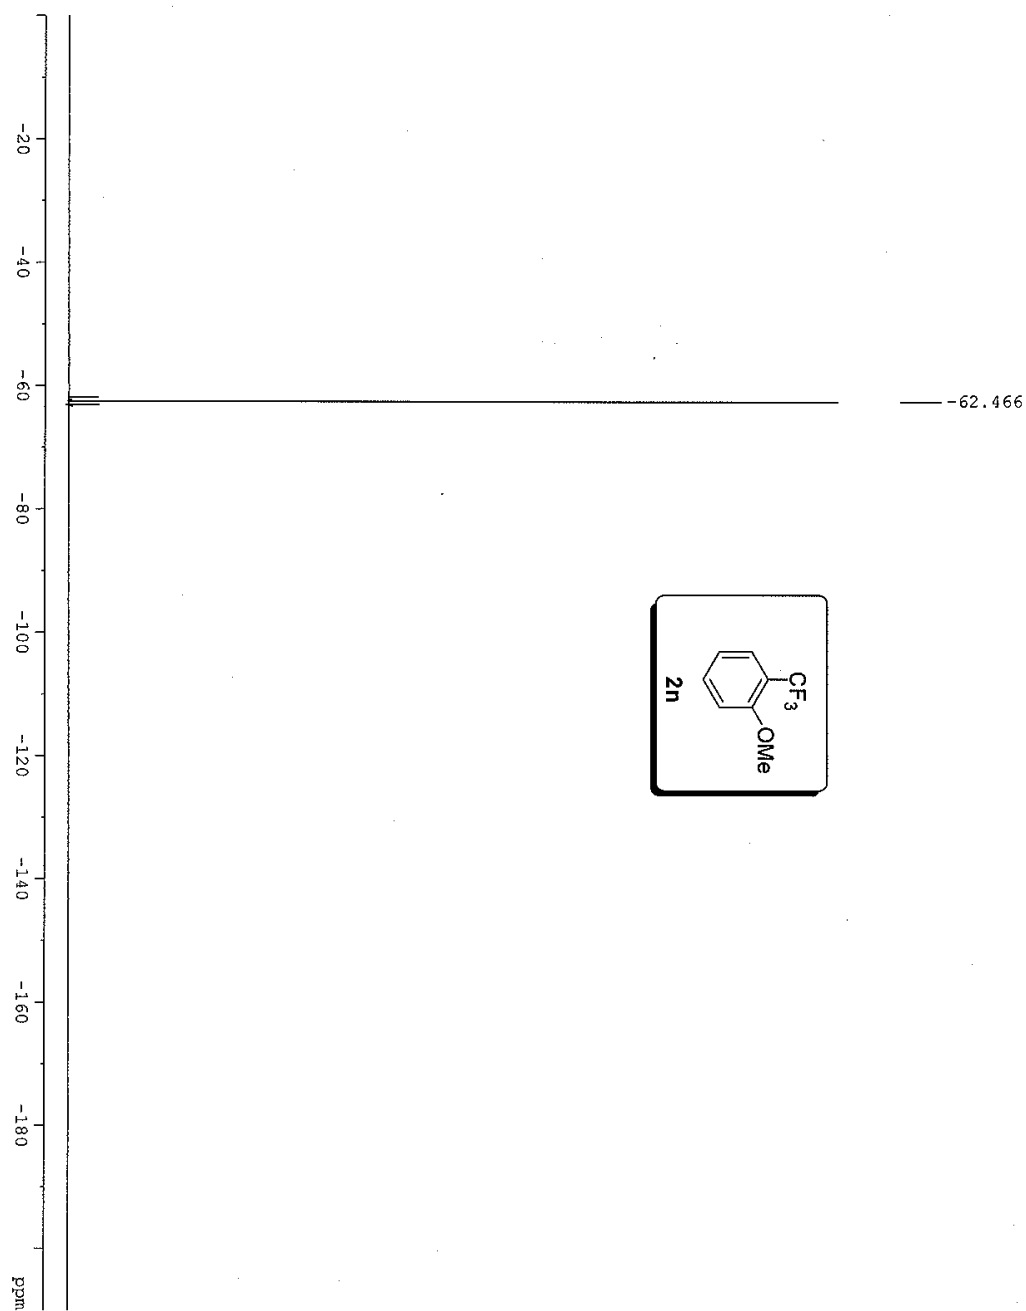

## GC-MS of crude 2o

Analysis : GC/MS  
Instrument : Shimadzu GC-2010  
Analyzed by : Admin  
Analyzed : 8/7/2013 12:36:04 PM  
Sample Type : Unknown  
Level # : 1  
Sample Name : SC-NSD-I-13  
Sample ID : SC-NSD-I-13  
IS Amount : [I]=1  
Sample Amount : 1  
Dilution Factor : 1  
Vial # : 2  
Injection Volume : 3

Sample Information

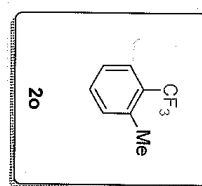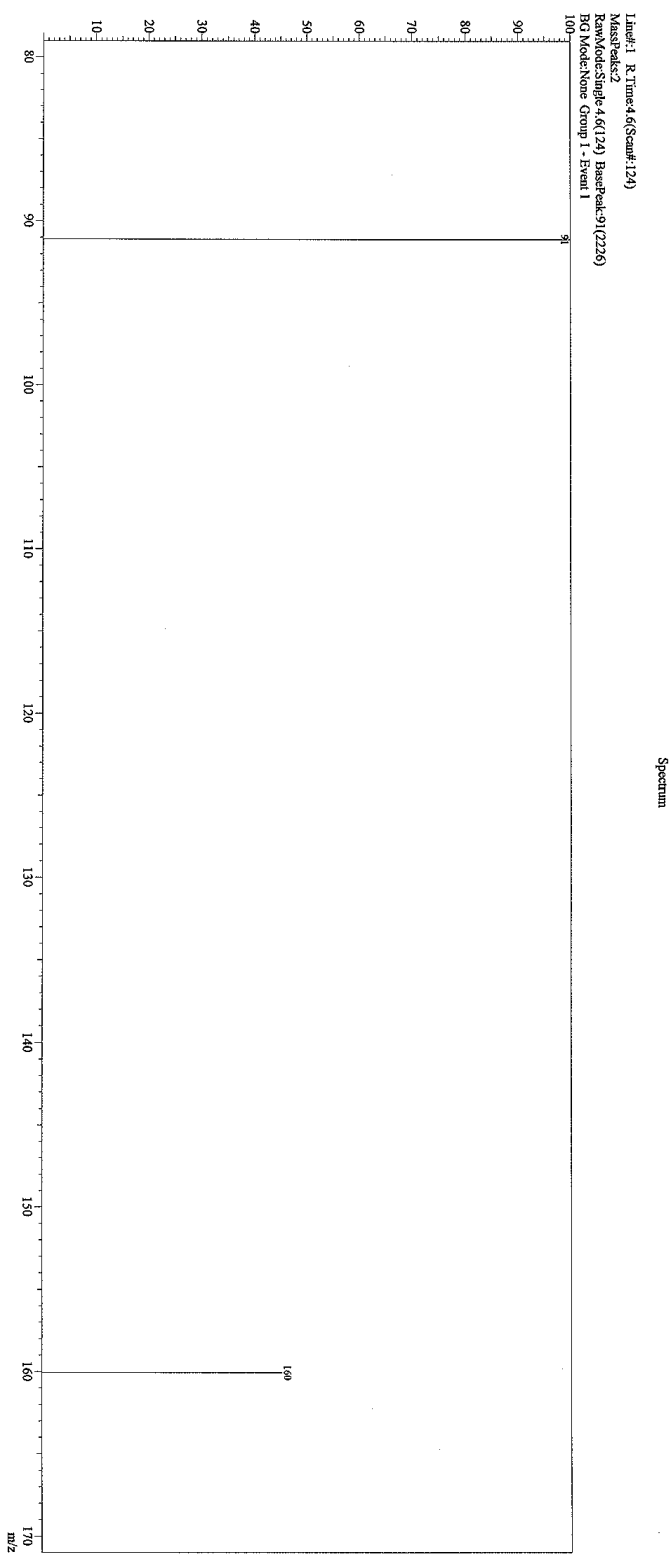

**$^{19}\text{F}$  NMR of crude 2o in  $\text{CDCl}_3$**

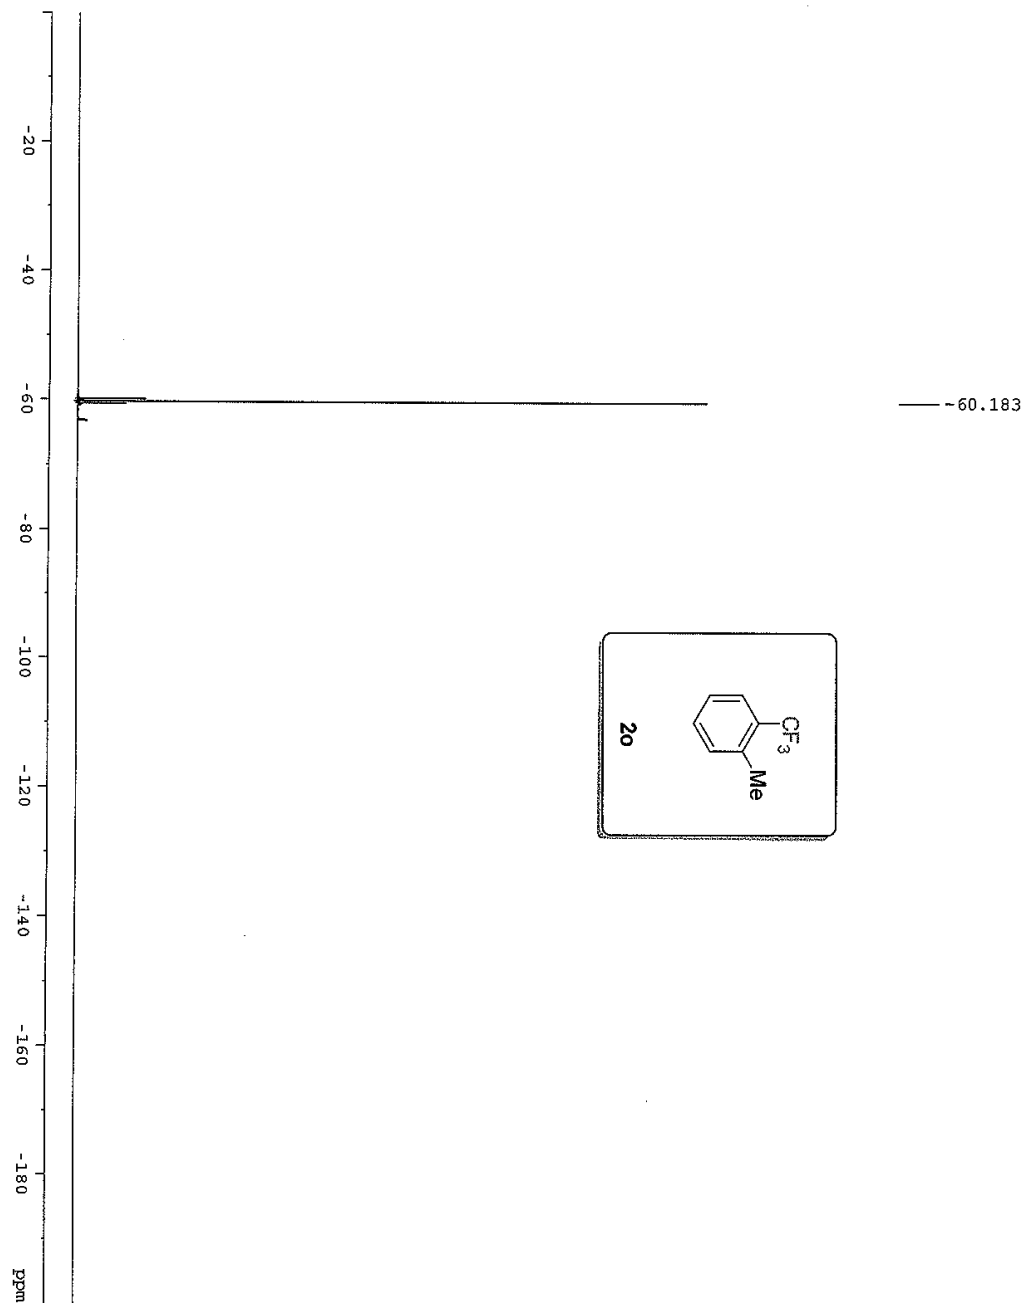

$^{19}\text{F}$  NMR yield of compound 2o ( $1.66/(1 \times 3) \times 100\% = 55\%$ ) in  $\text{CDCl}_3$

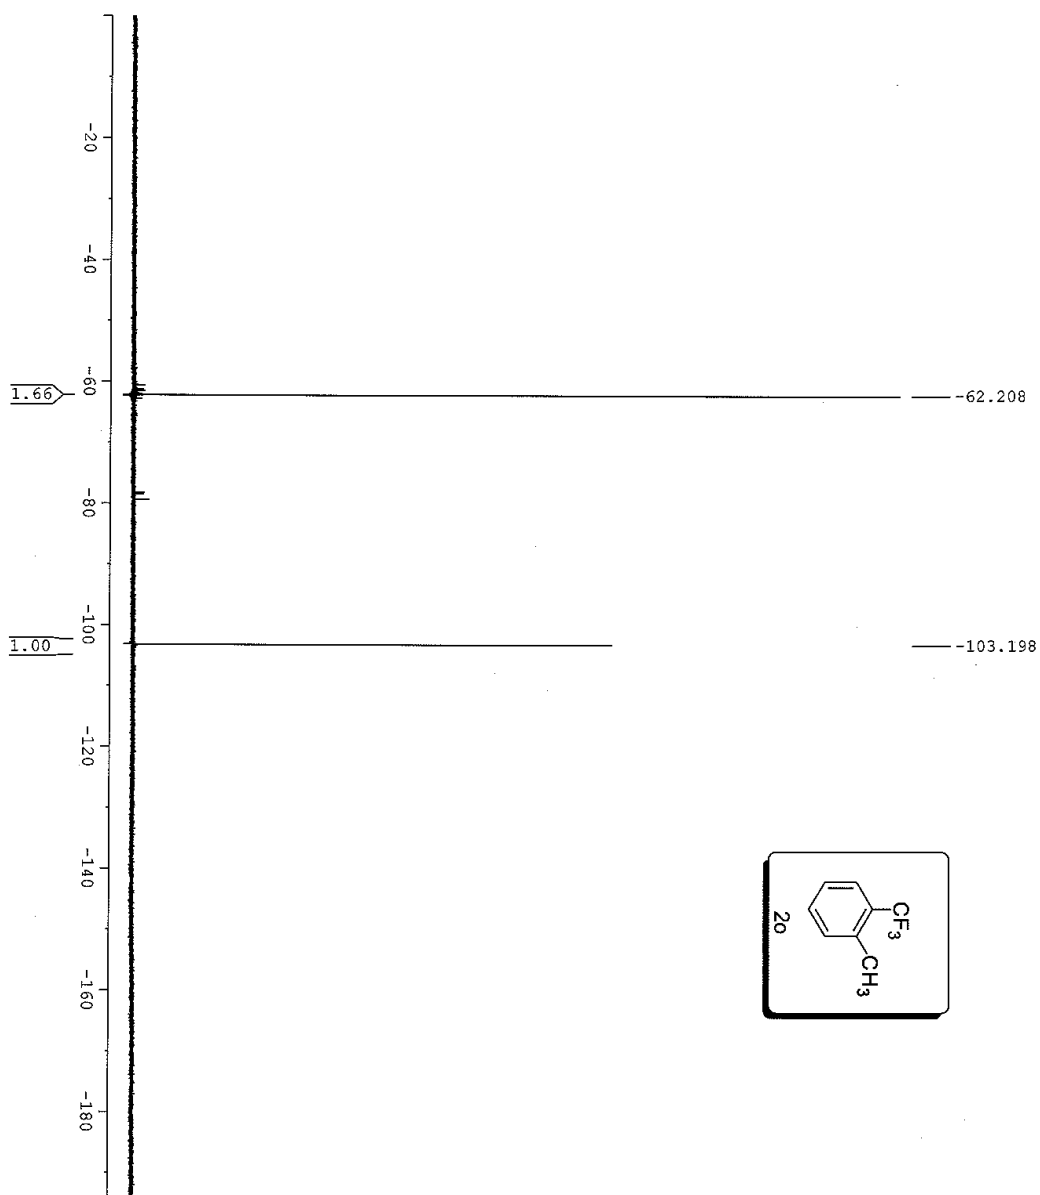

## GC-MS of crude 2p

Analysis : GC-MS  
Instrument : Shimadzu GC-2010  
Acquired by : 82572013 11:29:11 AM  
Acquisition :  
Sample Type : Unknown  
Level # : 1  
Sample Name : SG-NSD-132-SUNDAY  
Sample ID : SG-NSD-132-SUNDAY  
IS Amount : [1]=1  
Sample Amount : 1  
Dilution Factor : 1  
Vial # : 3  
Injection Volume : 5

### Sample Information

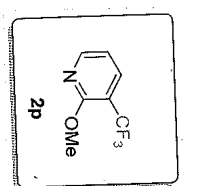

### Spectrum

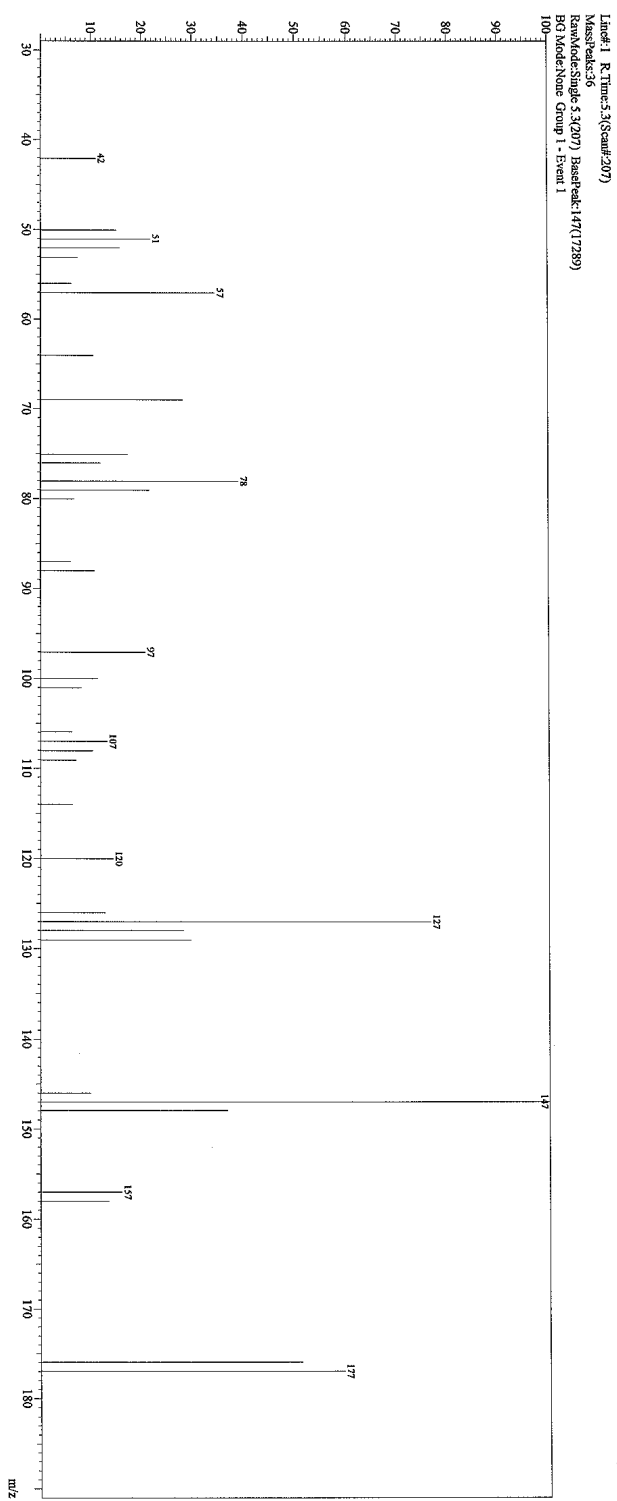

$^{19}\text{F}$  NMR of crude 2p in  $\text{CDCl}_3$

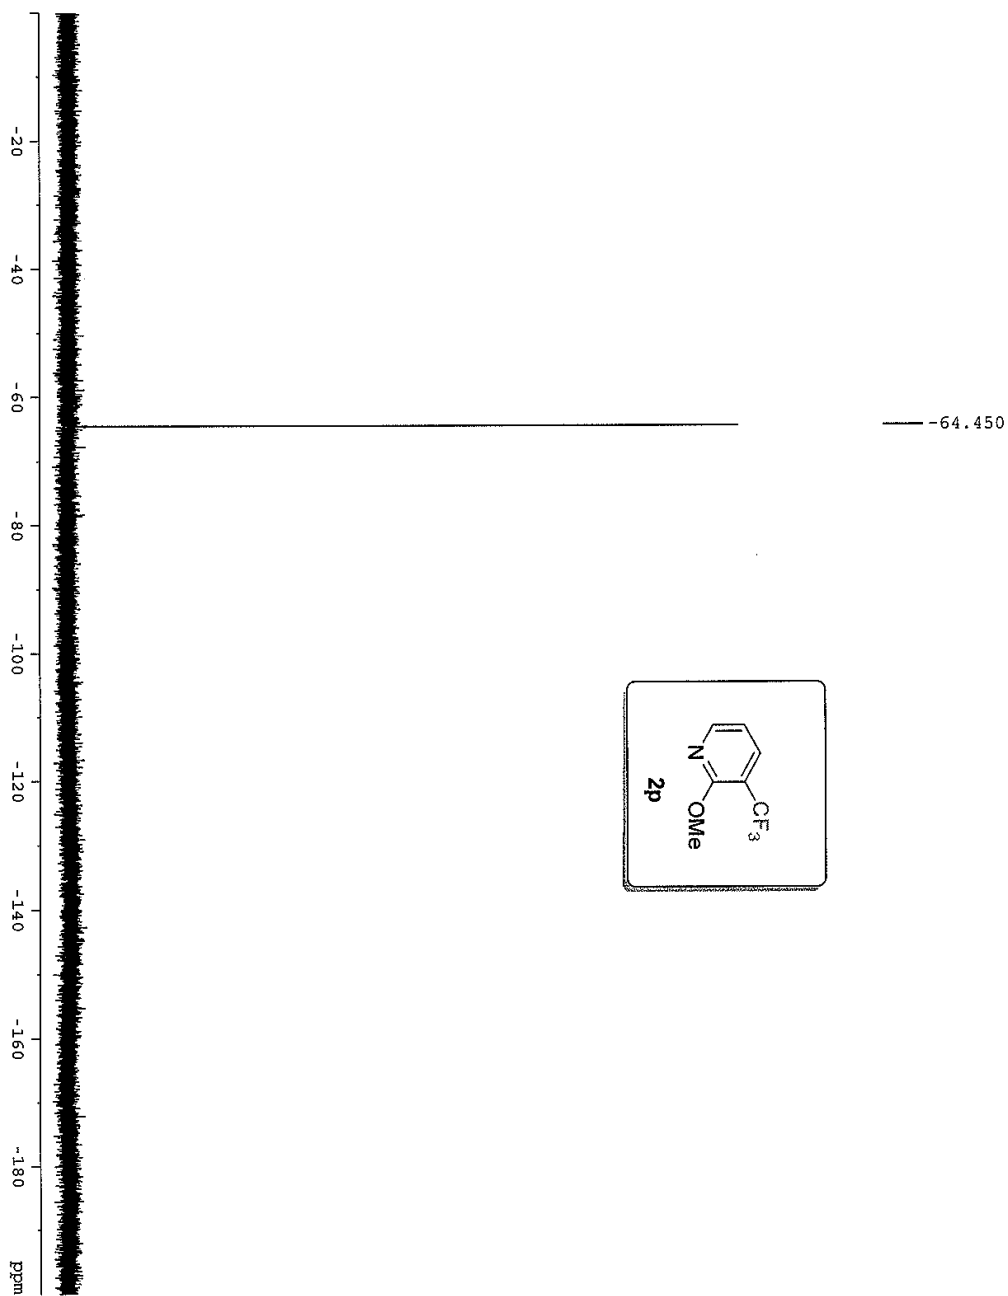

$^{19}\text{F}$  NMR yield of compound **2p** ( $2.54/(1 \times 3) \times 100\% = 85\%$ ) in  $\text{CDCl}_3$

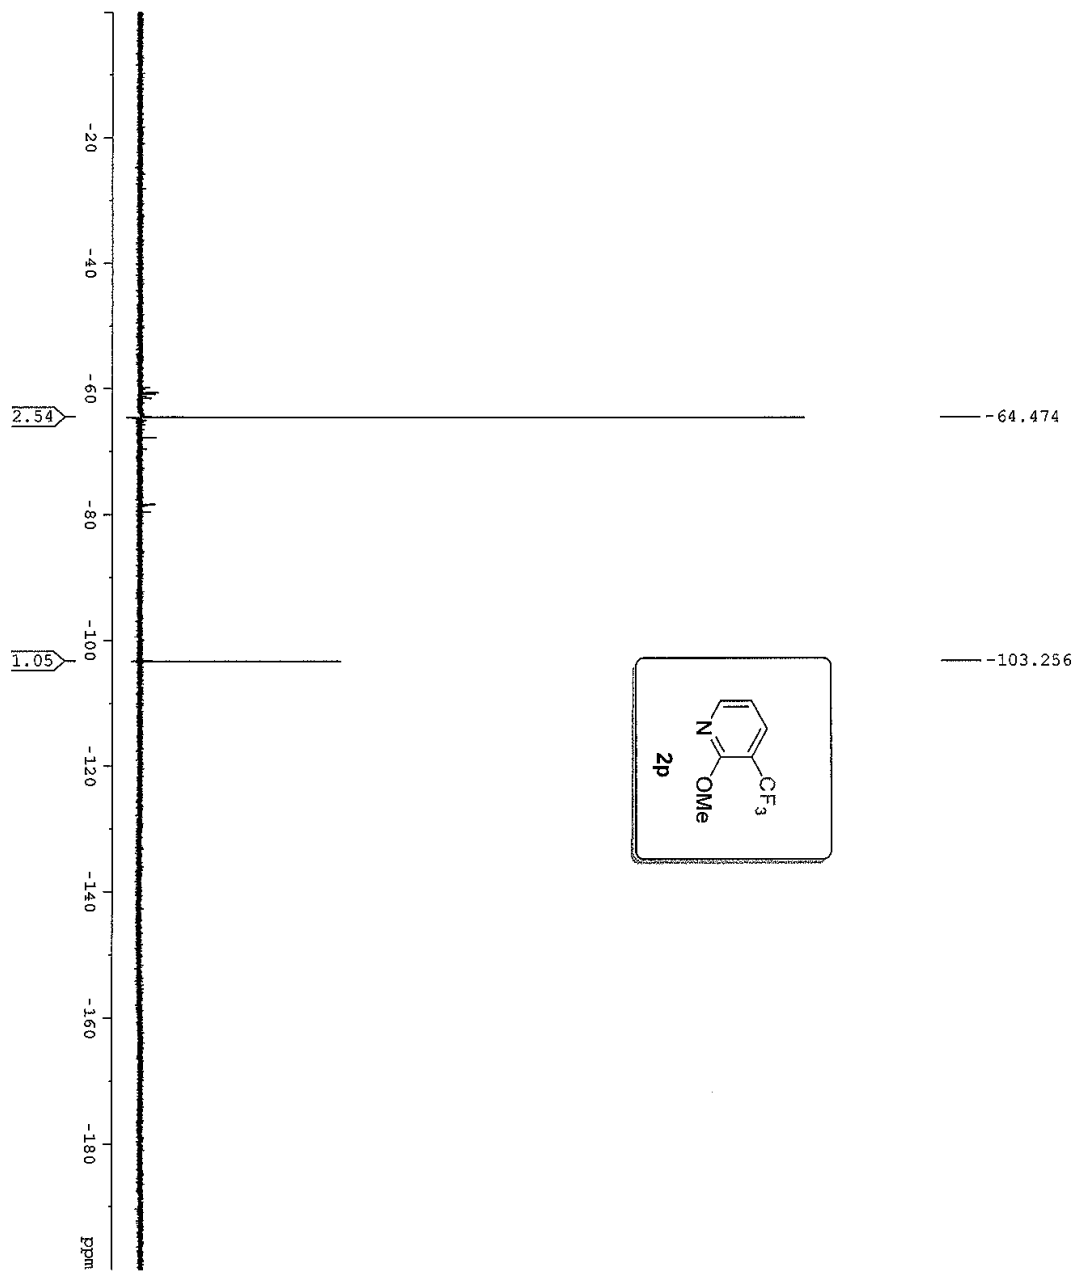

## GC-MS of crude 2q

Analysis : GC/MS  
Instrument : Shimadzu GC-2010  
Analyzed by : Admin  
Analyzed : 8/29/2013 4:36:37 PM  
Sample Type : Unknown  
Sample # : 1  
Sample Name : SG-MNS1-37  
Sample ID : SG-MNS1-37  
IS Amount : [1]=1  
Sample Amount : 1  
Dilution Factor : 1  
Vial # : 1  
Injection Volume : 5

### Sample Information

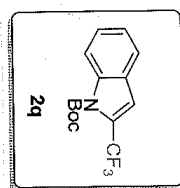

### Spectrum

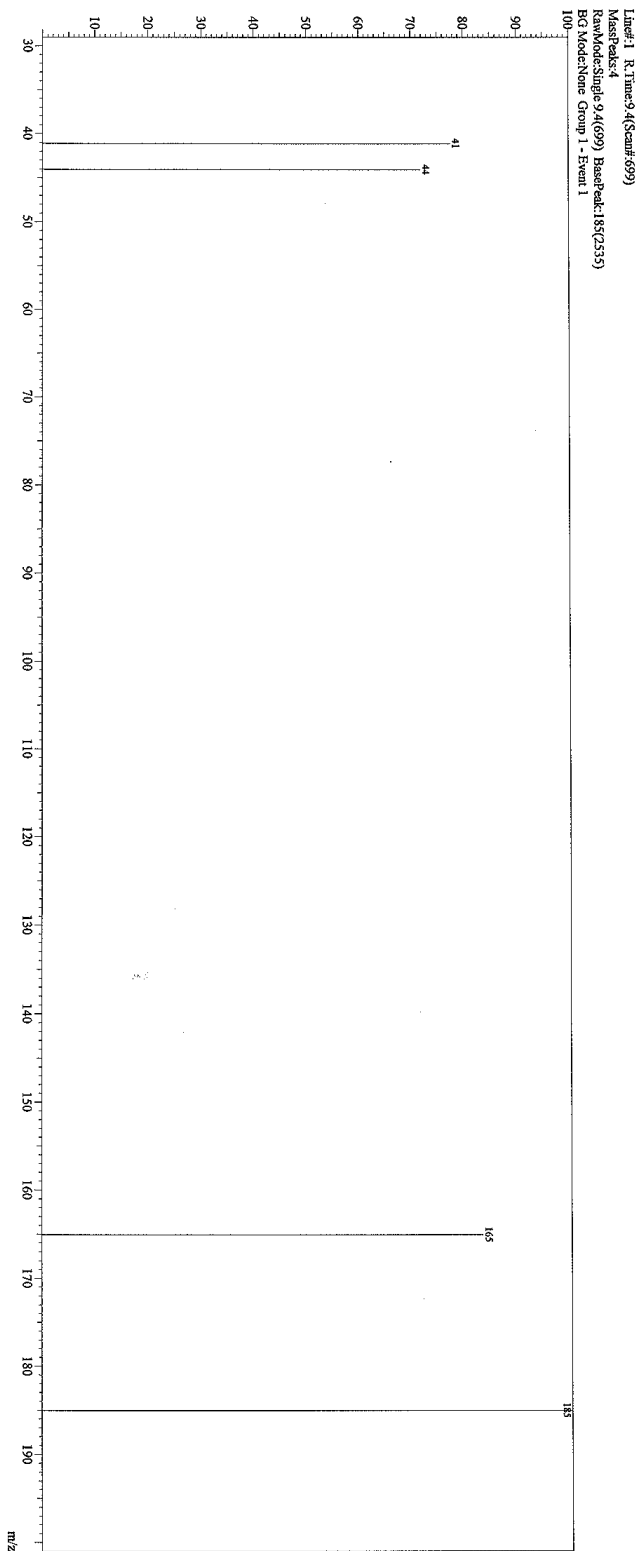



$^{19}\text{F}$  NMR of crude 2q in  $\text{CDCl}_3$

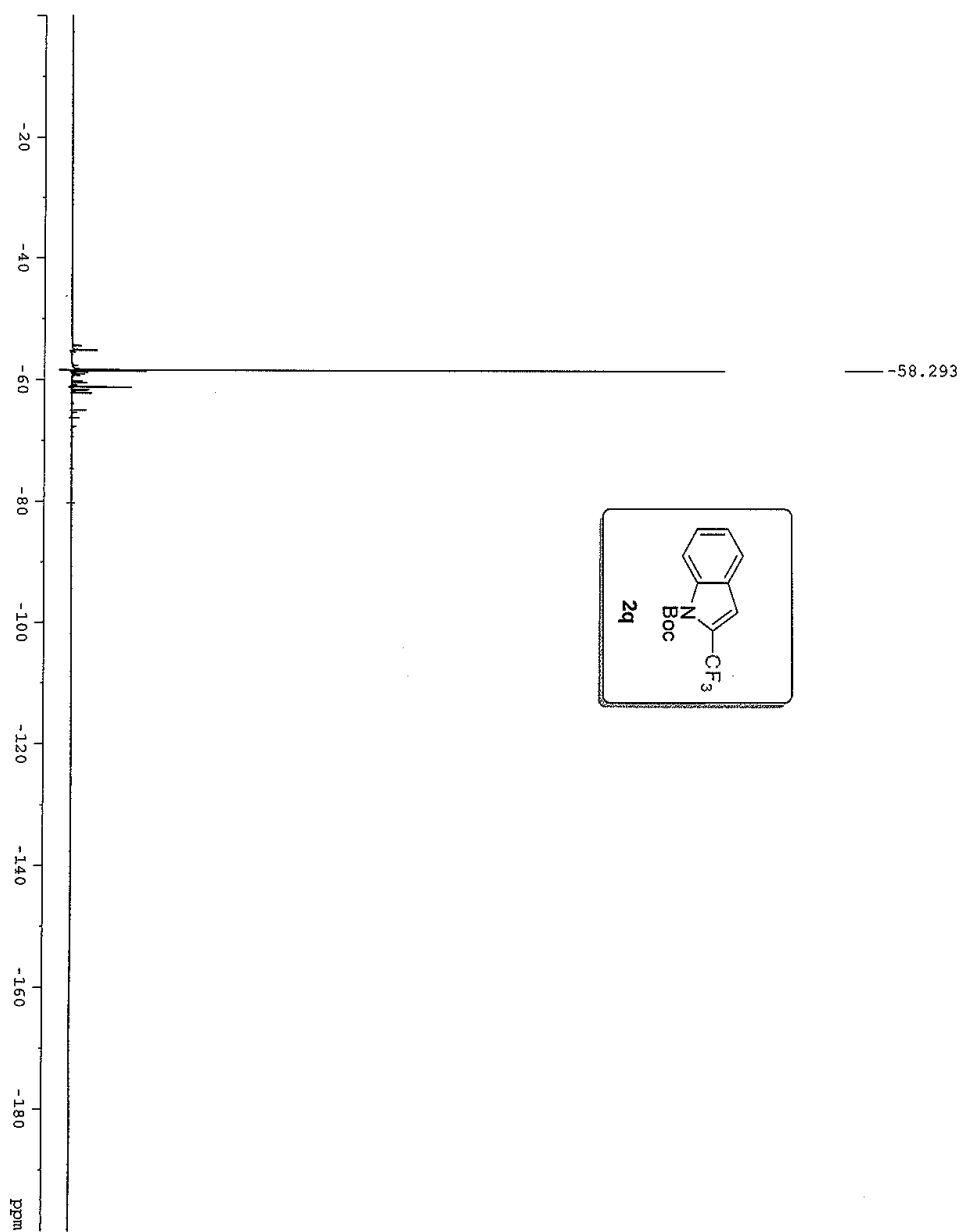

$^{19}\text{F}$  NMR yield of compound 2q  $(1.67/(1 \times 3) \times 100\% = 55\%)$  in  $\text{CDCl}_3$

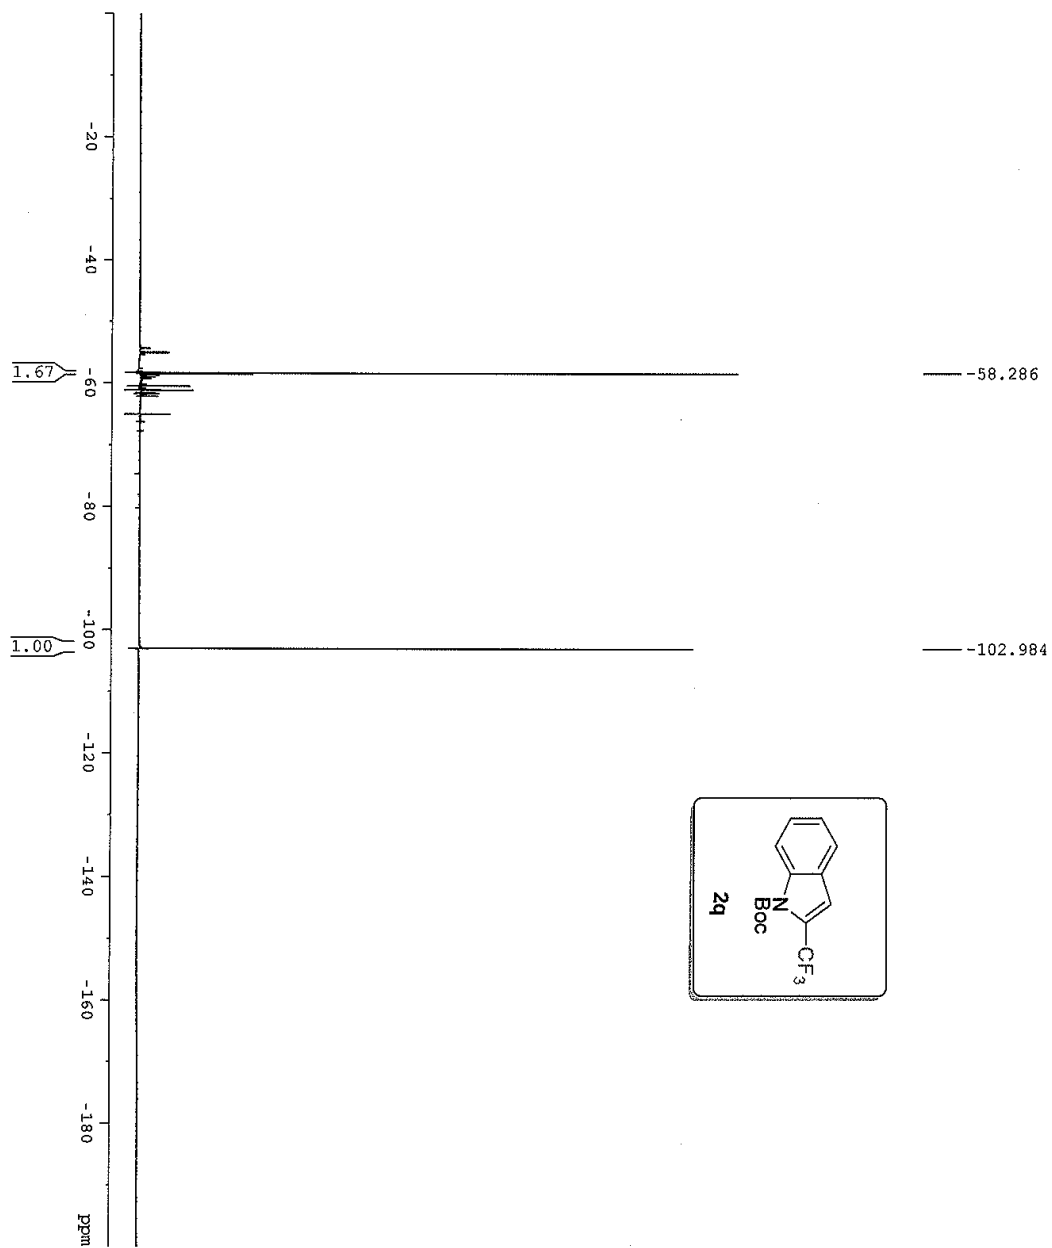

### $^1\text{H}$ NMR of compound 2q

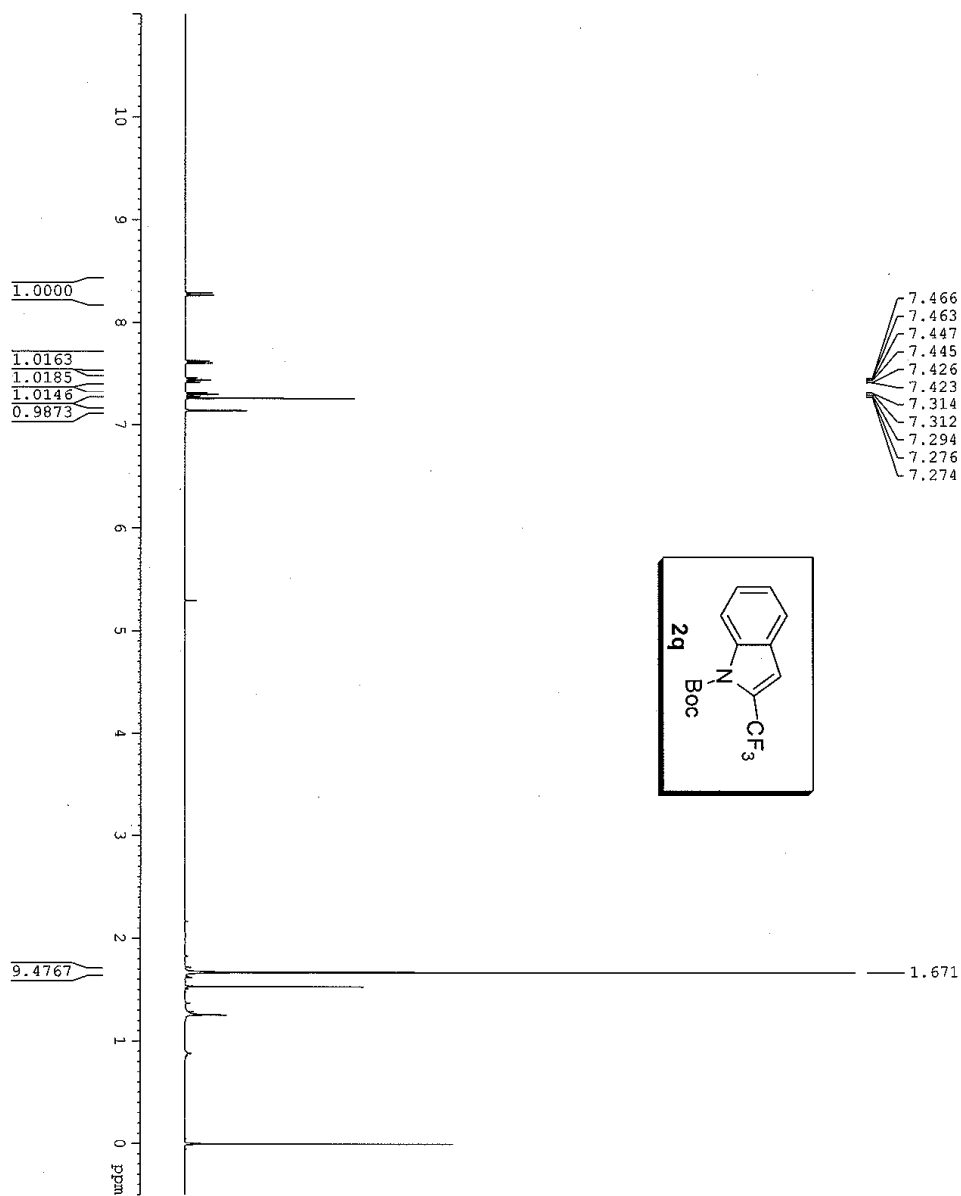

$^{19}\text{F}$  NMR of isolated 2q in  $\text{CDCl}_3$

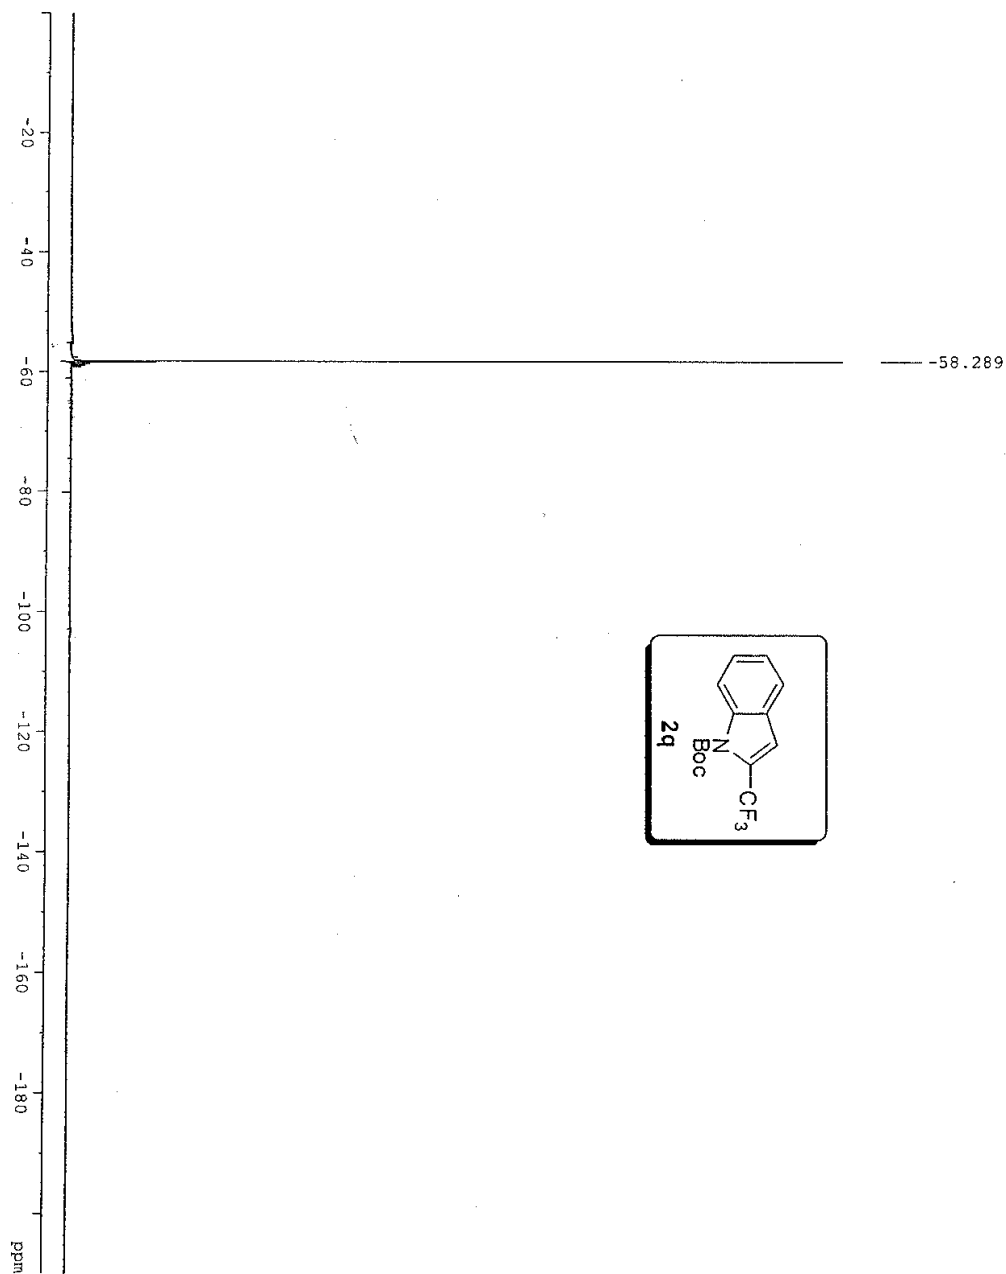

## GC-MS of crude 2r

Sample Information

Analyte : GC-MS  
Instrument : Shimadzu GC-2010  
Analyzed By : Admin  
Analyzed : 8/20/2013 5:32:11 PM  
Sample Type : Unknown  
Level # : 1  
Sample Name : SG-NSD-424  
Sample ID : SG-NSD-424  
IS Amount : 11 µl  
Sample Amount : 1  
Dilution Factor : 1  
Vial # : 1  
Injection Volume : 5

Link# 1 R\_Time:6.1 (Scan#:296)  
MassPeak:31  
Retention:Single 6.1(296) BasePeak:186(389482)  
Mode:None Group 1 - Event 1

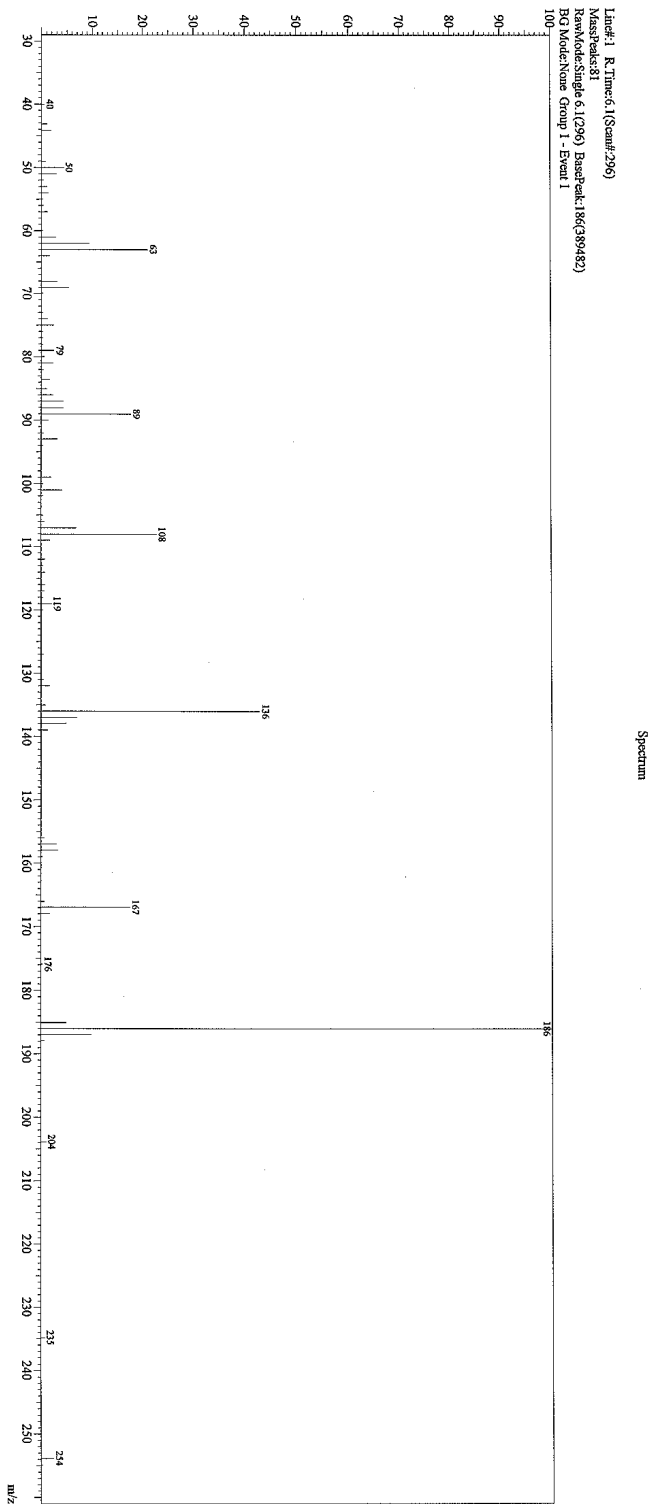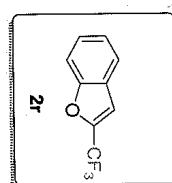

$^{19}\text{F}$  NMR of crude 2r in  $\text{CDCl}_3$

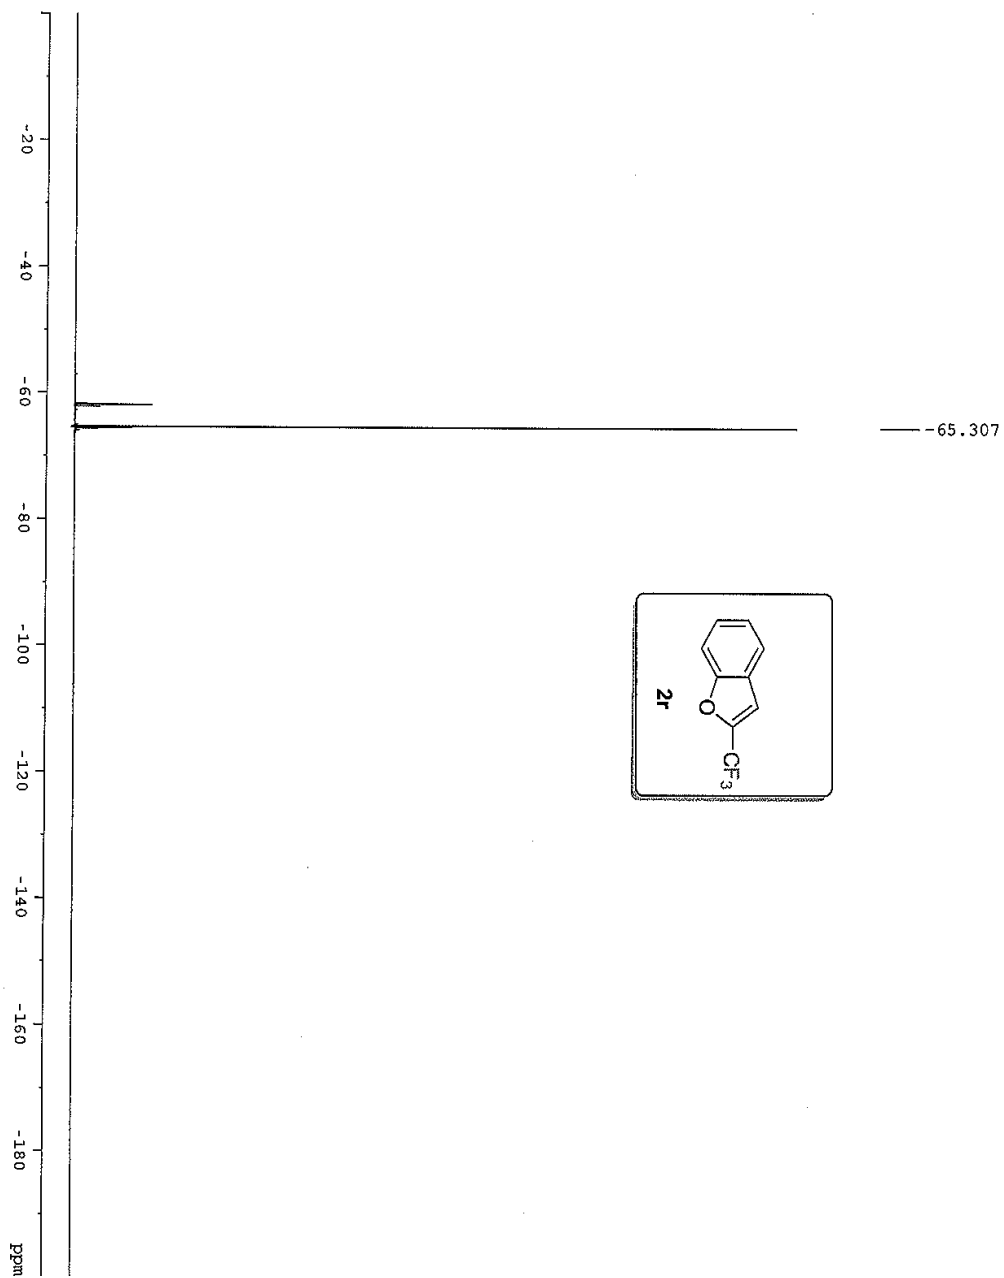

$^{19}\text{F}$  NMR yield of compound 2r ( $2.75/(1 \times 3) \times 100\% = 91\%$ ) in  $\text{CDCl}_3$

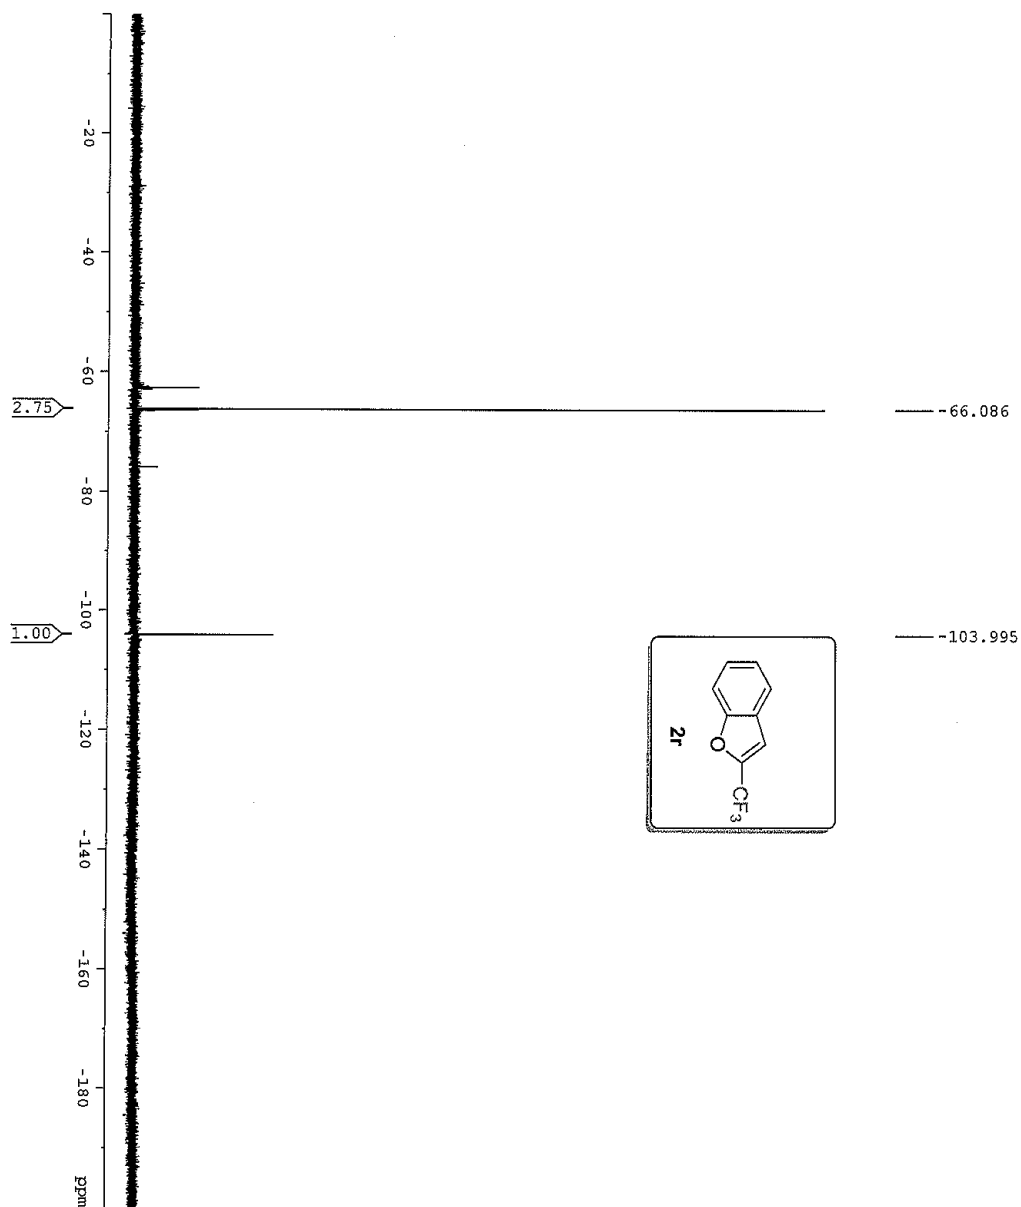

$^1\text{H}$  NMR of 2r in  $\text{CDCl}_3$

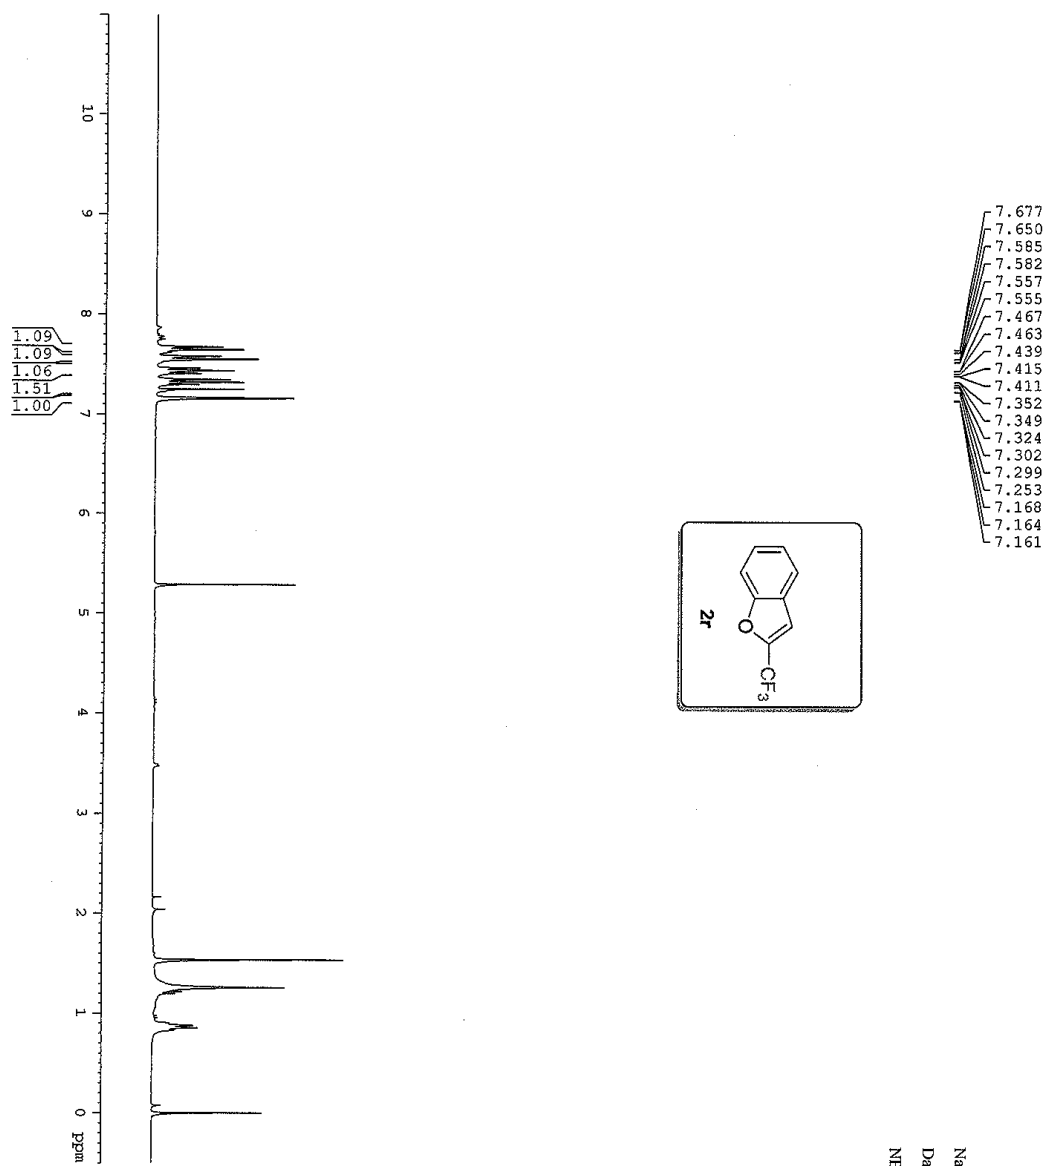



$^{13}\text{C}$  NMR of 2r in  $\text{CDCl}_3$

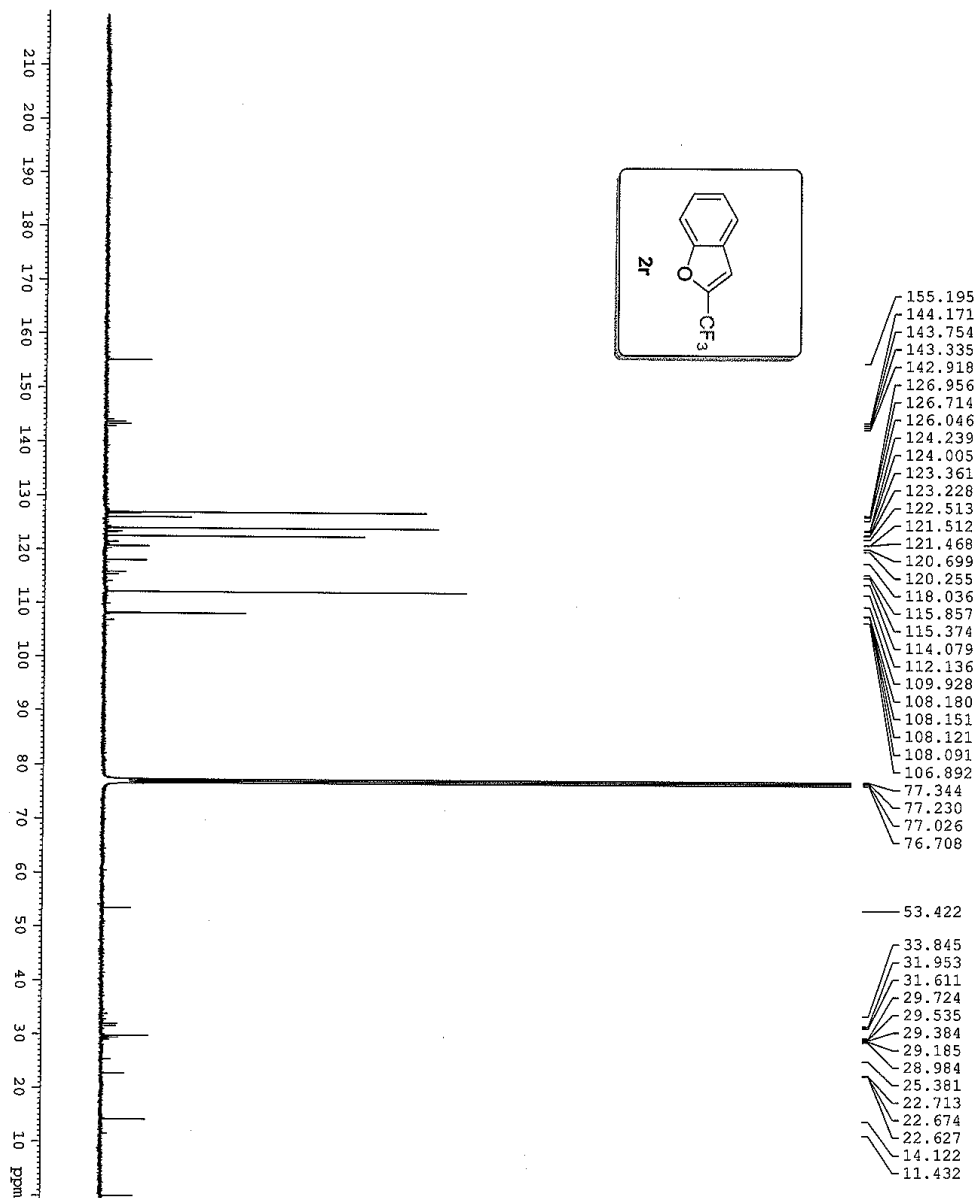

$^{19}\text{F}$  NMR of isolated 2r in  $\text{CDCl}_3$

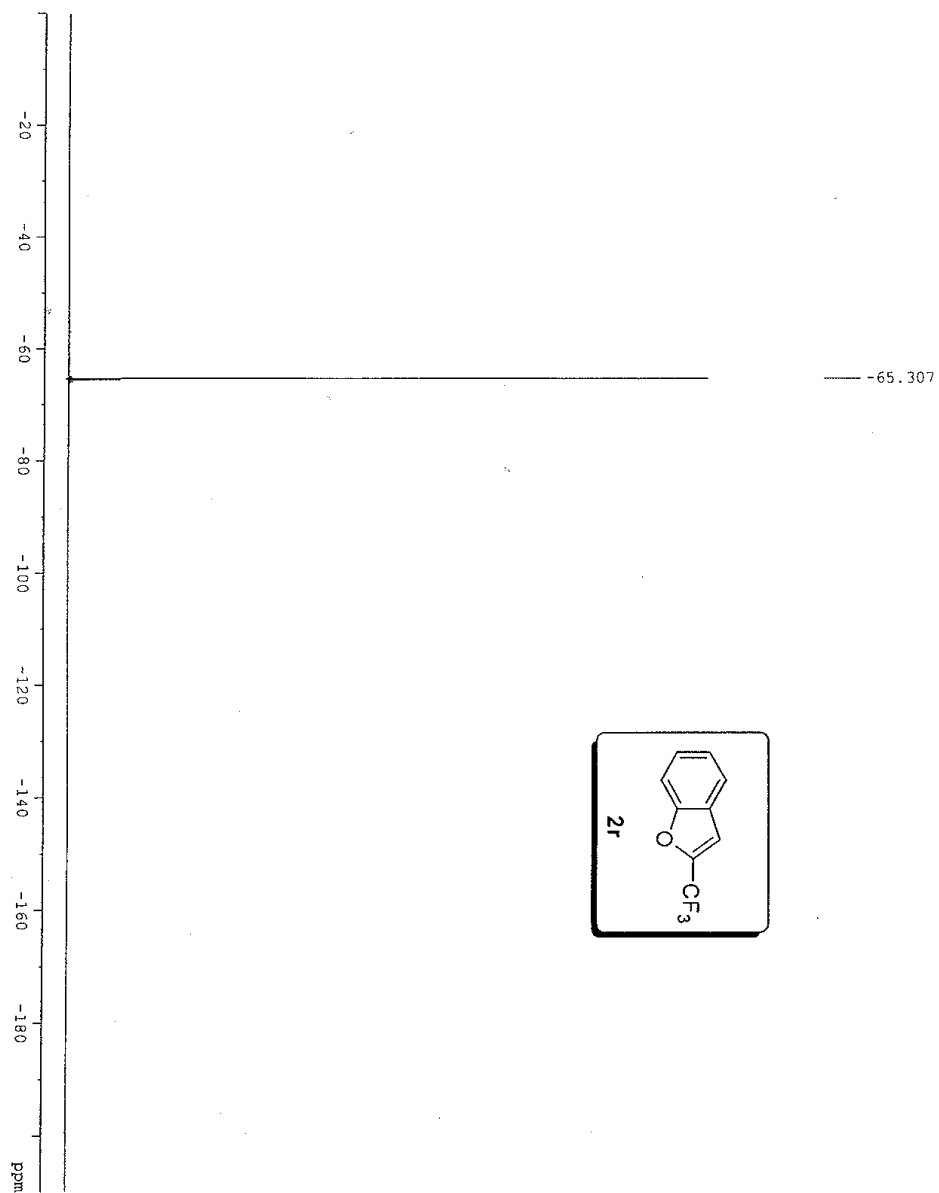

## GC-MS of crude 2s

Analysis : GC-MS  
Instrument : Shimadzu GC-2010  
Analyzed by : Admin  
Analyzed : 8/19/2013 4:24:22 PM  
Sample Type : Unknown  
Level # : 1  
Sample Name : SG-MNS-125  
Sample ID : SG-MNS-125  
IS Amount : [I]=1  
Sample Amount : 1  
Dilution Factor : 1  
Vial # : 6  
Injection Volume : 3

### Sample Information

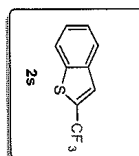

### Spectrum

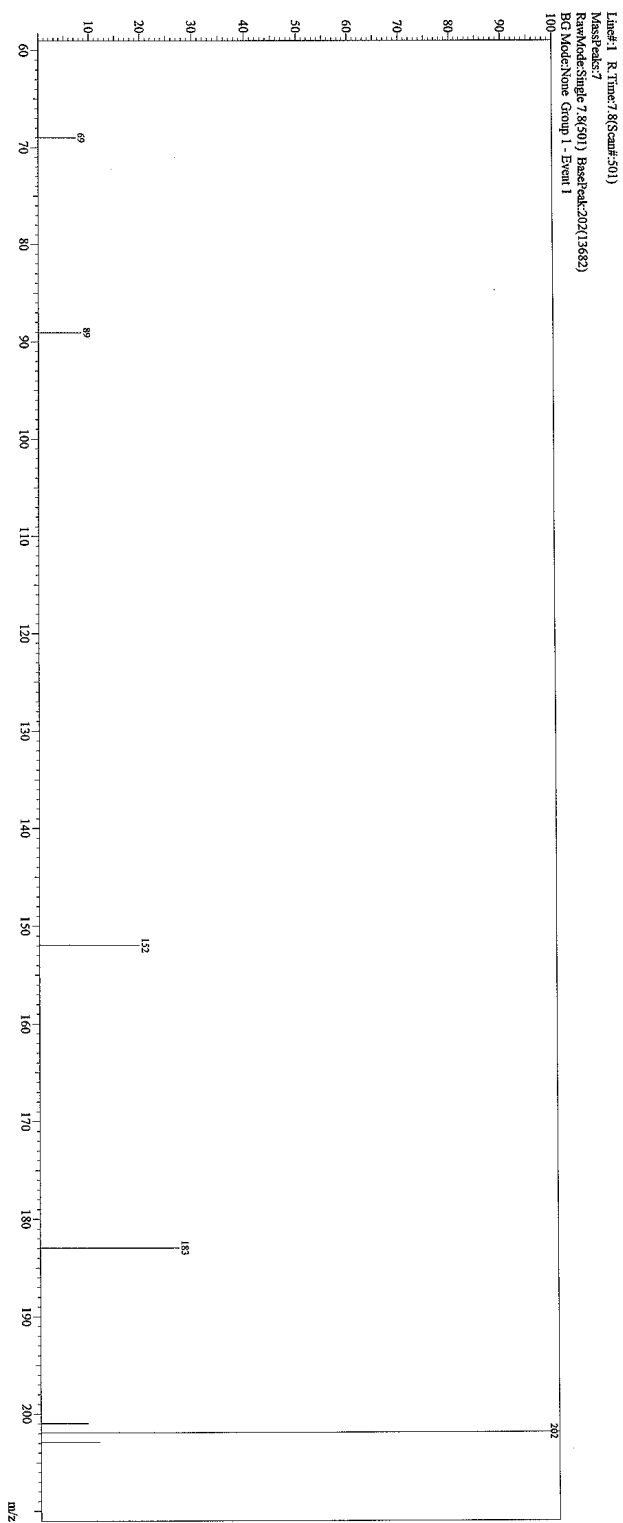

$^{19}\text{F}$  NMR of crude **2s** in  $\text{CDCl}_3$

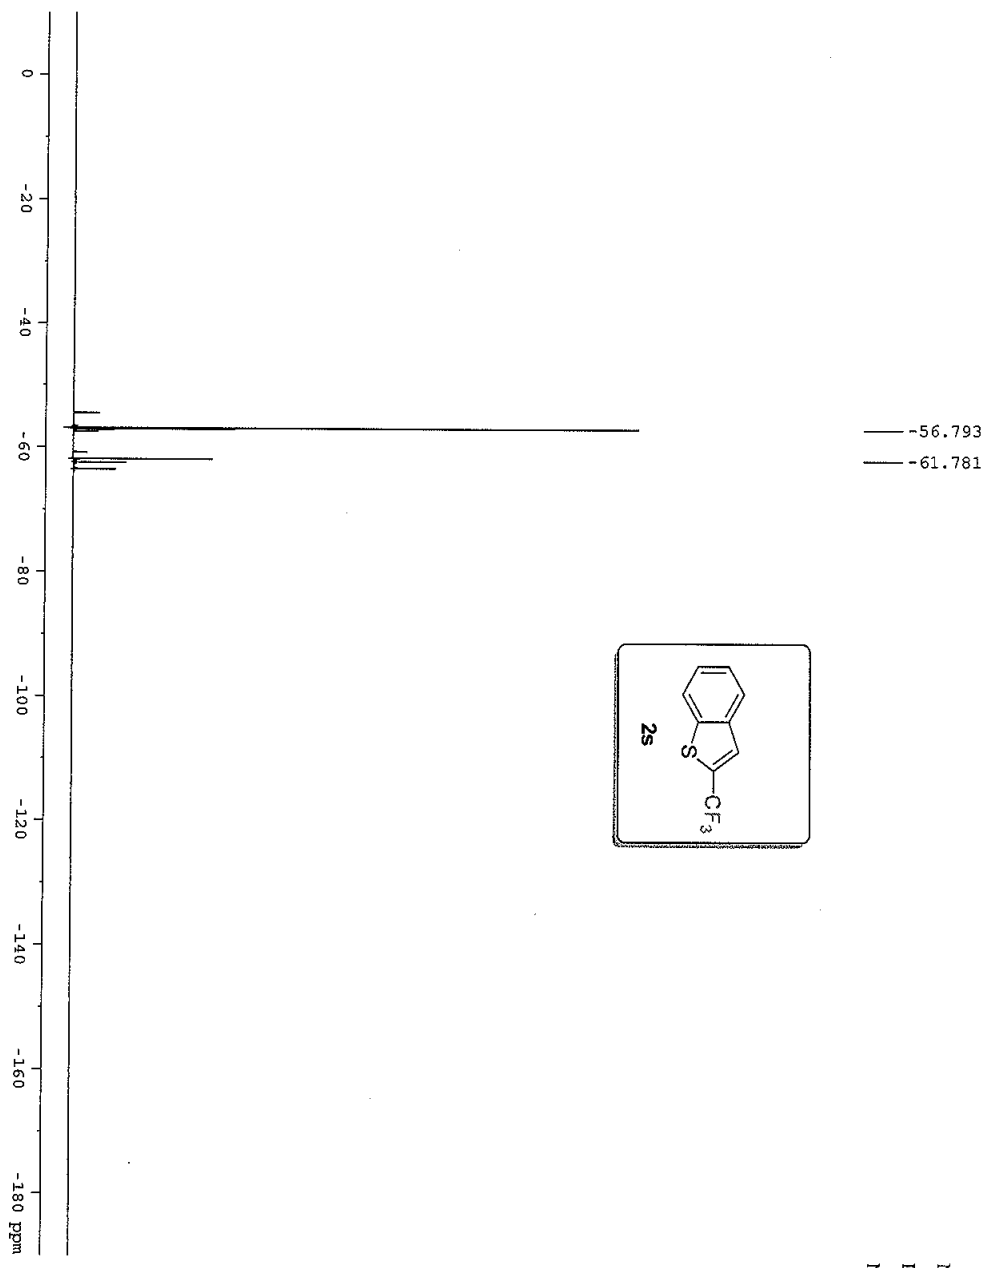

$^{19}\text{F}$  NMR yield of compound 2s ( $1.62/(1 \times 3) \times 100\% = 54\%$ ) in  $\text{CDCl}_3$

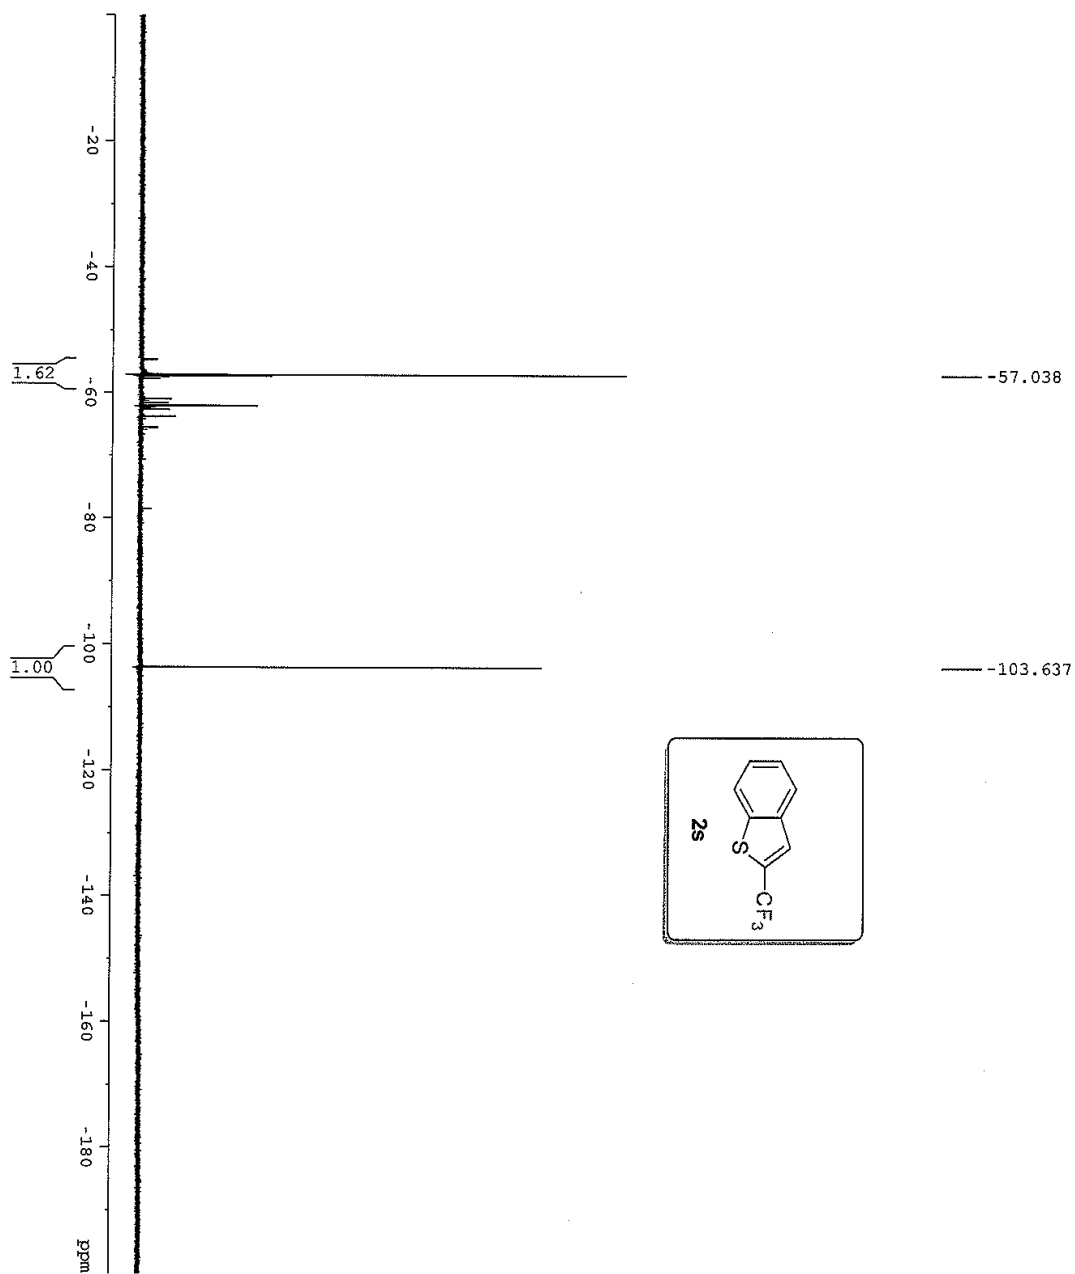

### $^1\text{H}$ NMR of compound 2s

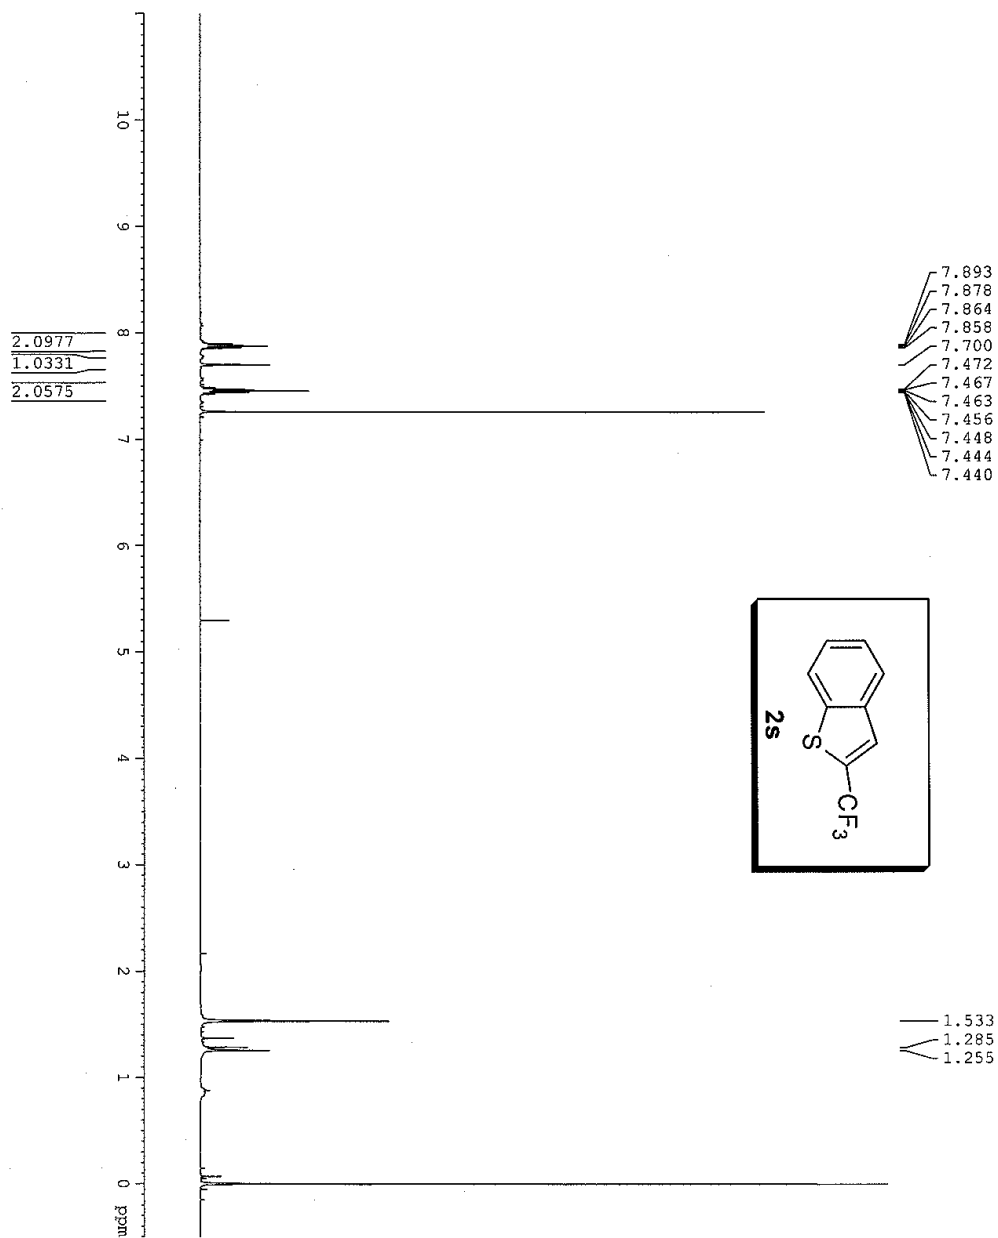

$^{19}\text{F}$  NMR of isolated **2s** in  $\text{CDCl}_3$

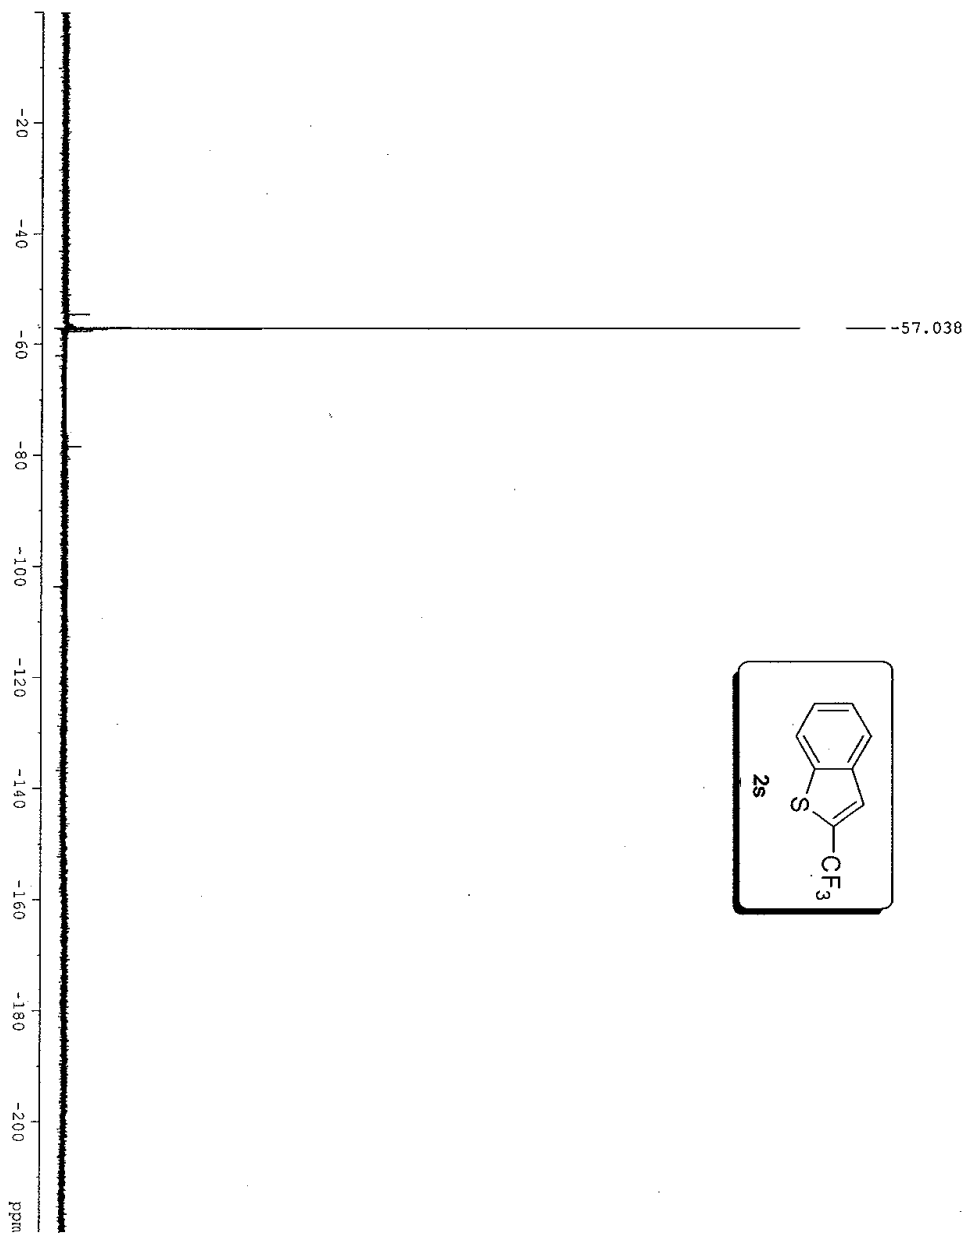

## GC-MS of crude 2h

Analysis : GC-MS  
Instrument : Shimadzu GC-2010  
Analyzed by : Admin  
Analyzed : 8/25/2013 10:53:05 AM  
Sample Type : Unknown  
Level # : 1  
Sample Name : SG-MNS-1-35  
Sample ID : SG-MNS-1-35  
IS Amount : [1]=1  
Sample Amount : 1  
Dilution Factor : 1  
Vial # : 2  
Injection Volume : 5

### Sample Information

Level: 1, RetTime: 47.5 (Scan#: 109)  
MassPeak: 2  
RetentionTime: 47.5 (109) BasePeak: 91 (5134)  
BG Mode: None Group 1 - Event 1

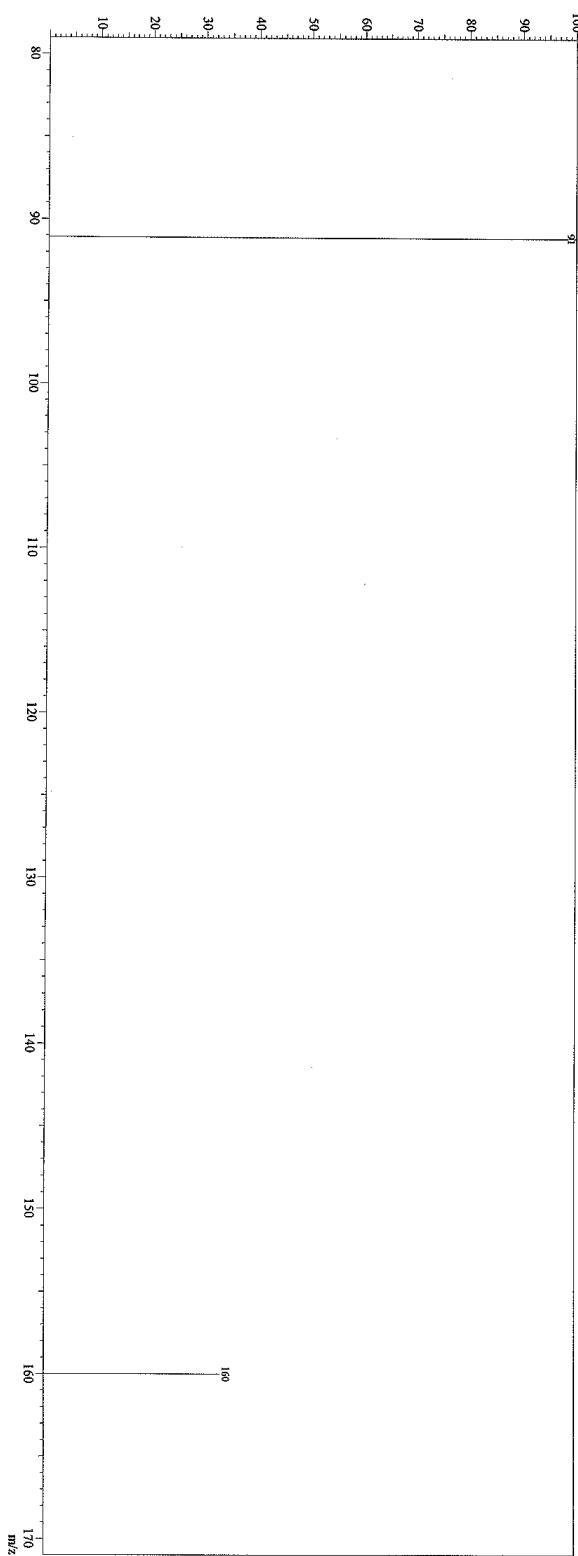

Spectrum

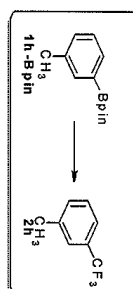



$^{19}\text{F}$  NMR of crude 2h in  $\text{CDCl}_3$

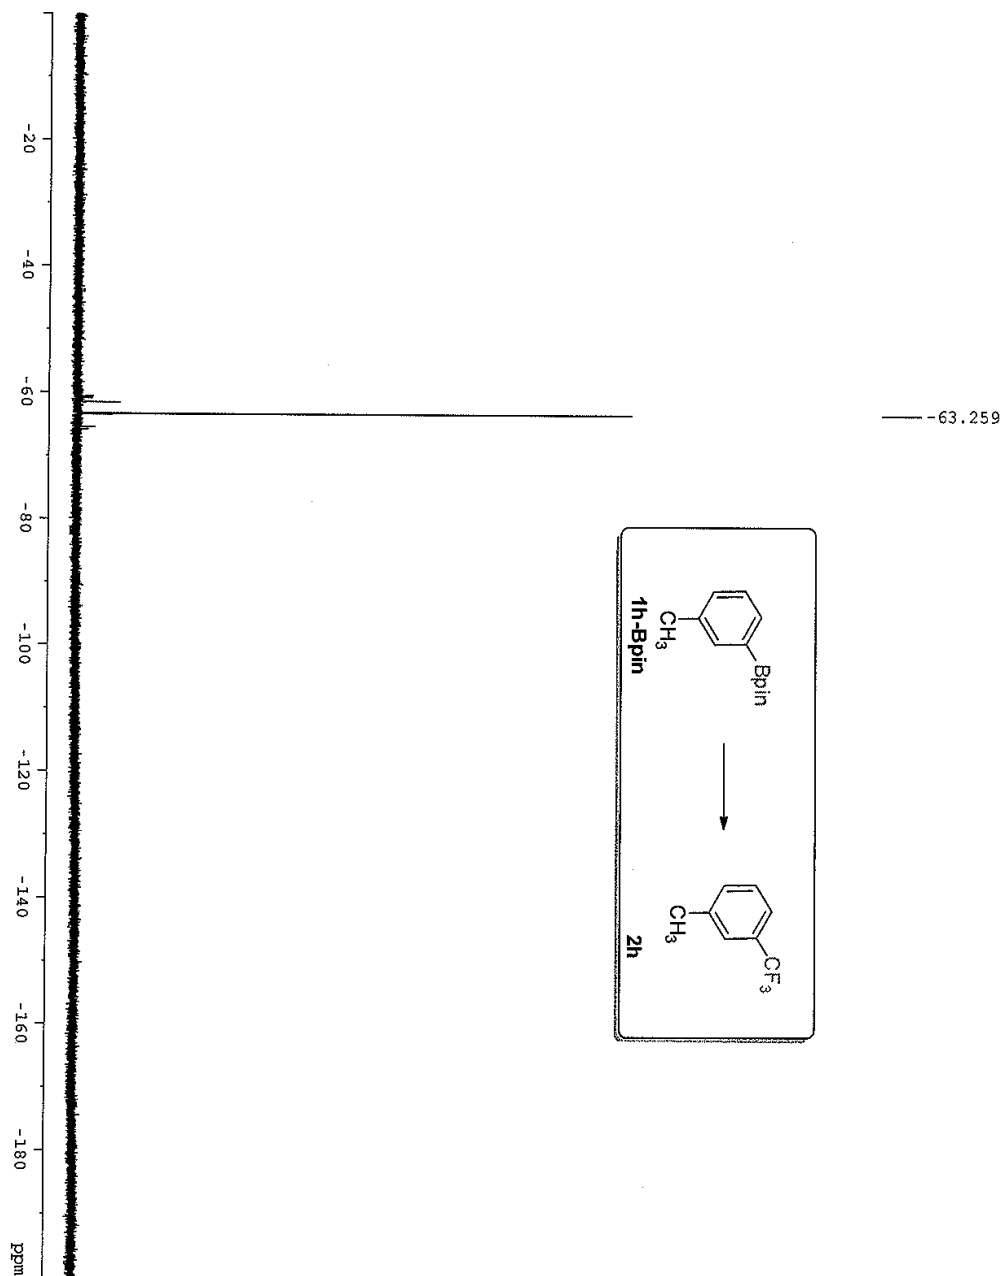

$^{19}\text{F}$  NMR yield of compound **2h**  $(0.84/(1 \times 3) \times 100\% = 28\%)$  in  $\text{CDCl}_3$

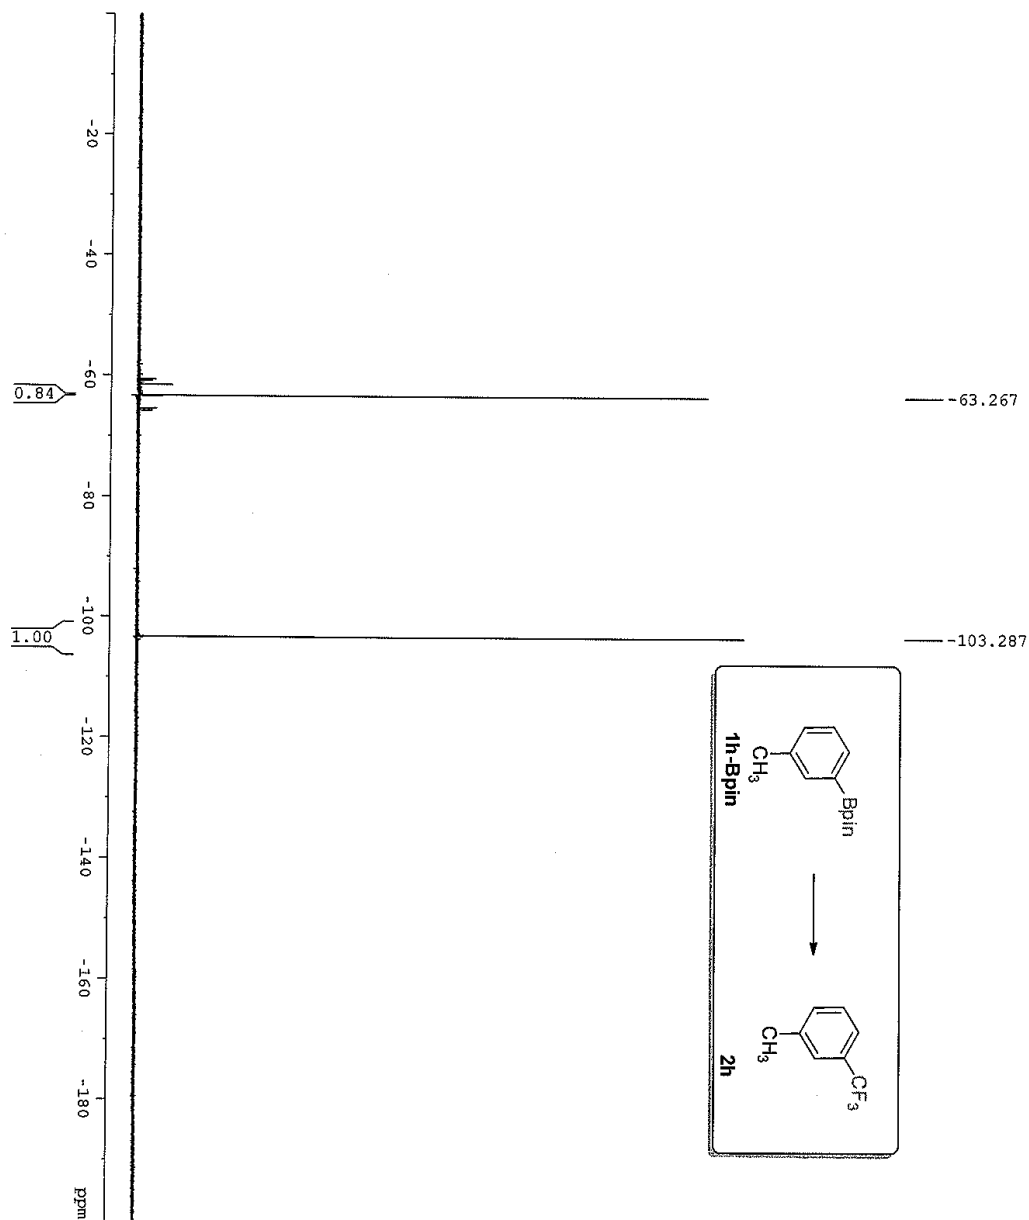

### GC-MS of crude 2t

Analysis : GC-MS  
Instrument : Shimadzu GC-2010  
Analyzed by : Adama  
Analyzed : 8/20/2013 3:24:00 PM  
Sample Type : Unknown  
Level # : 1  
Sample Name : SG-VANS-I-28  
Sample ID : SG-VANS-I-28  
IS Amount : [1]=1  
Sample Amount : 1  
Injection Factor : 1  
Year # : 1  
Injection Volume : 5

#### Sample Information

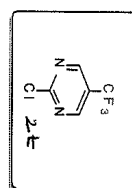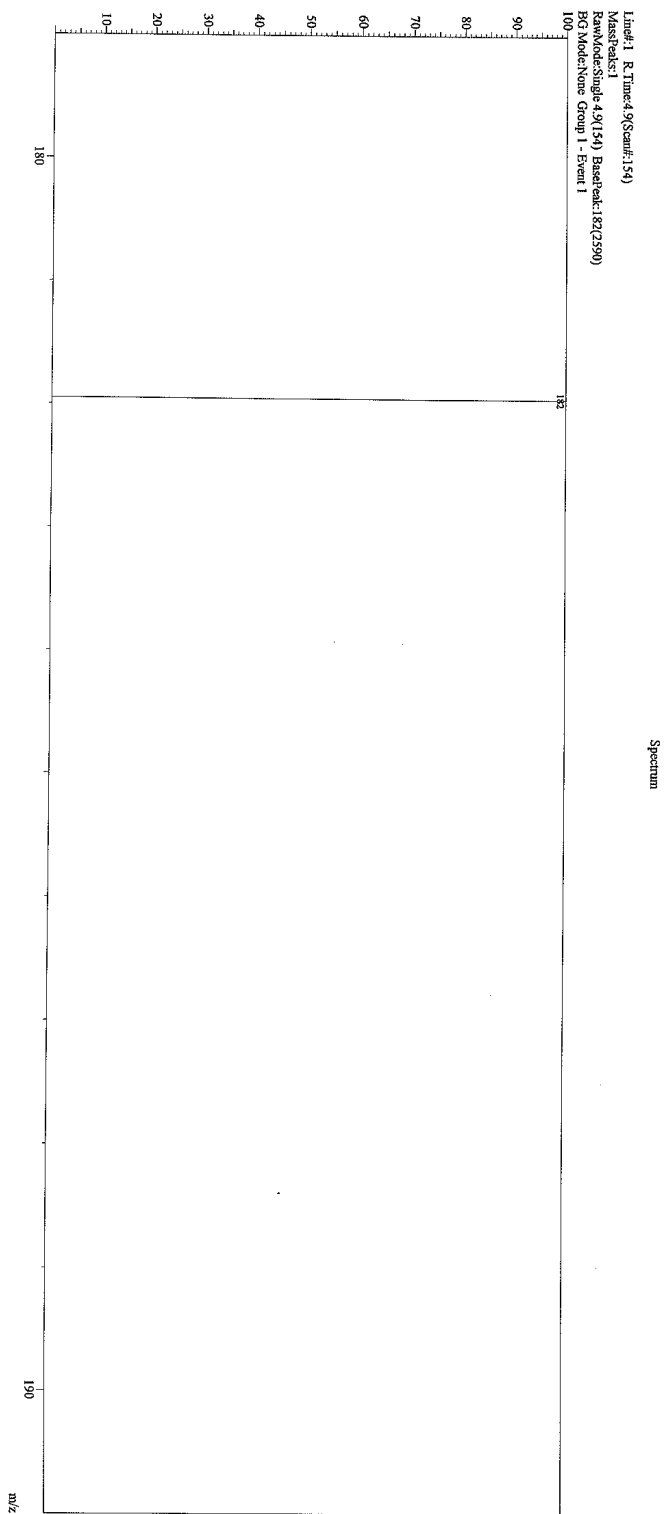

$^{19}\text{F}$  NMR of crude **2t** in  $\text{CDCl}_3$

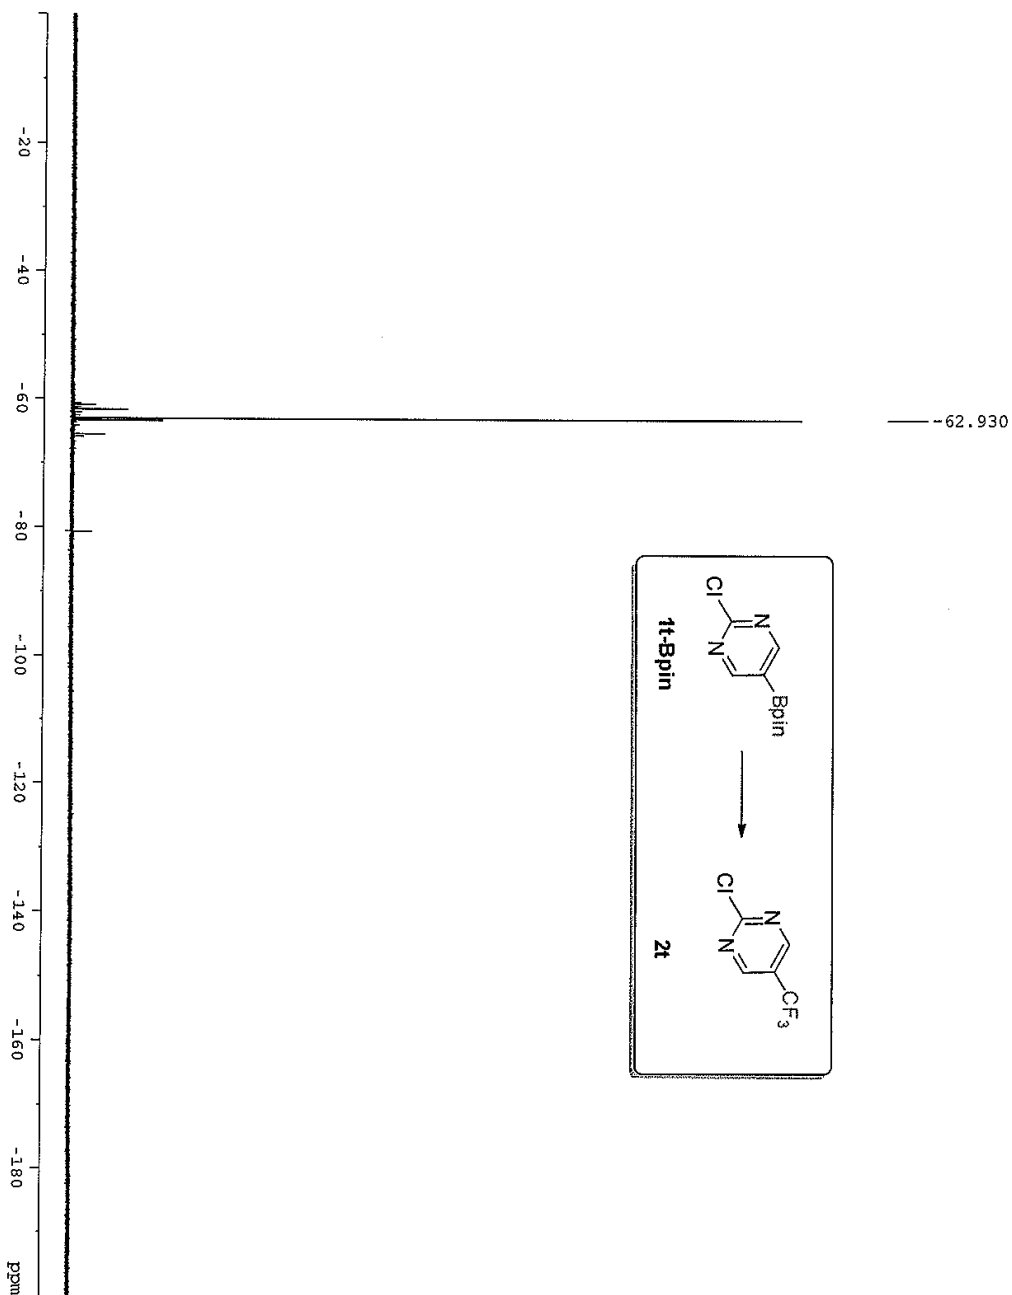

$^{19}\text{F}$  NMR yield of compound **2t** ( $0.91/(1 \times 3) \times 100\% = 30\%$ ) in  $\text{CDCl}_3$

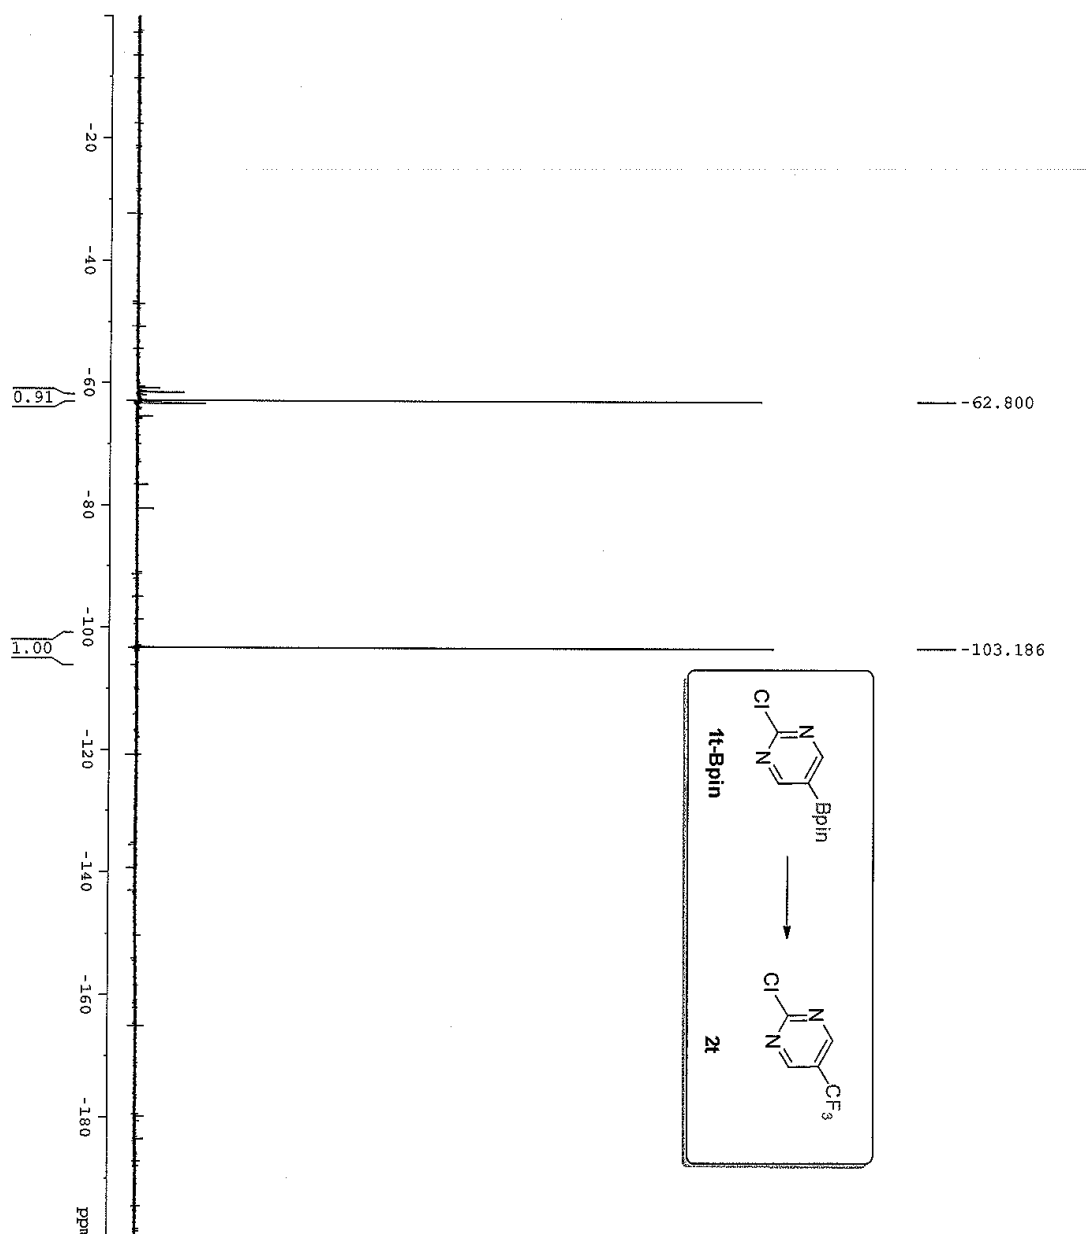

$^1\text{H}$  NMR of 4a in  $\text{CD}_3\text{OD}$

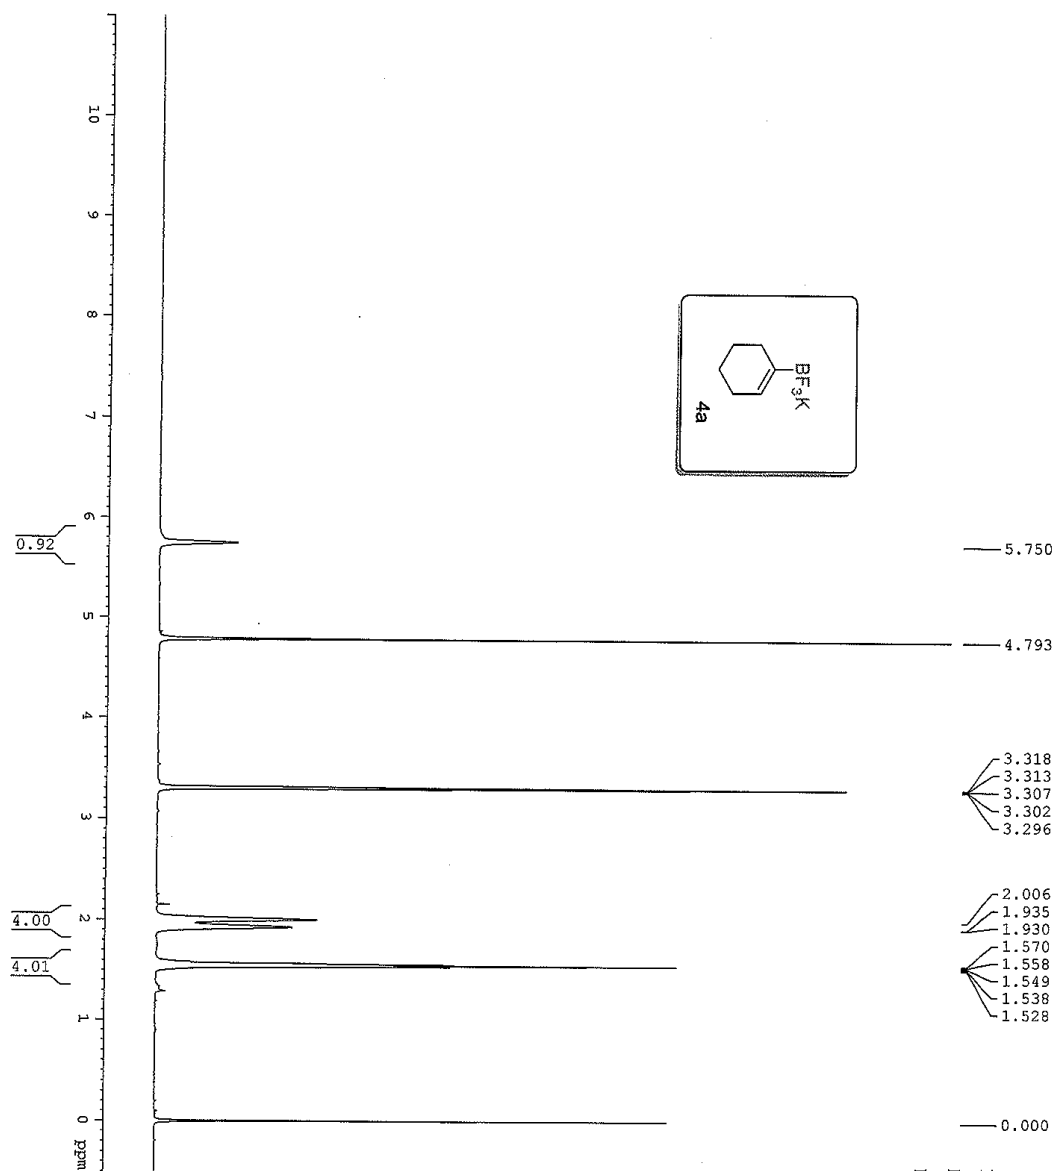

### $^{19}\text{F}$ NMR of 4a in $\text{CD}_3\text{OD}$

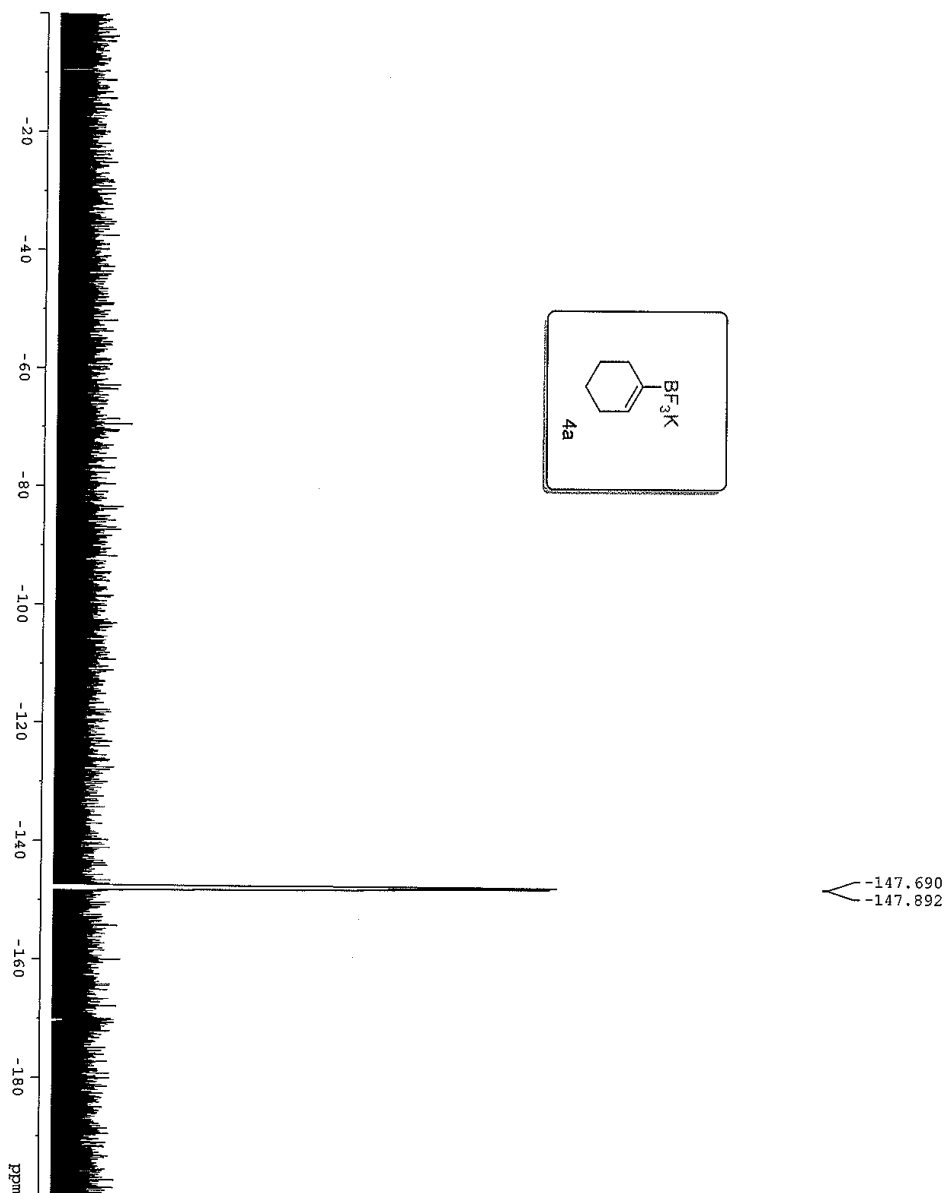

$^{13}\text{C}$  NMR of 4a in  $\text{CD}_3\text{OD}$

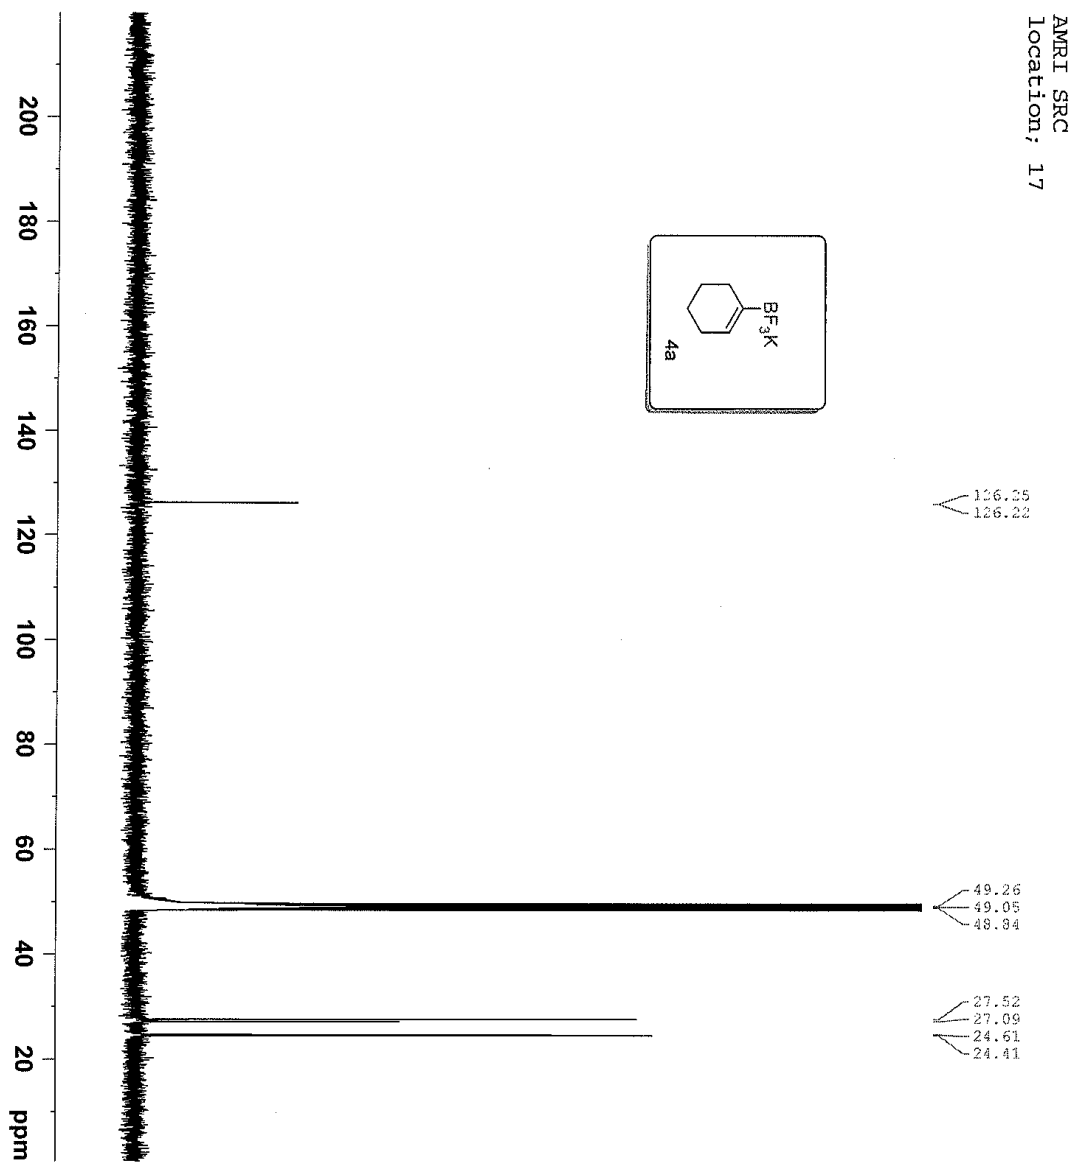



$^1\text{H}$  NMR of 4b in  $\text{CD}_3\text{OD}$

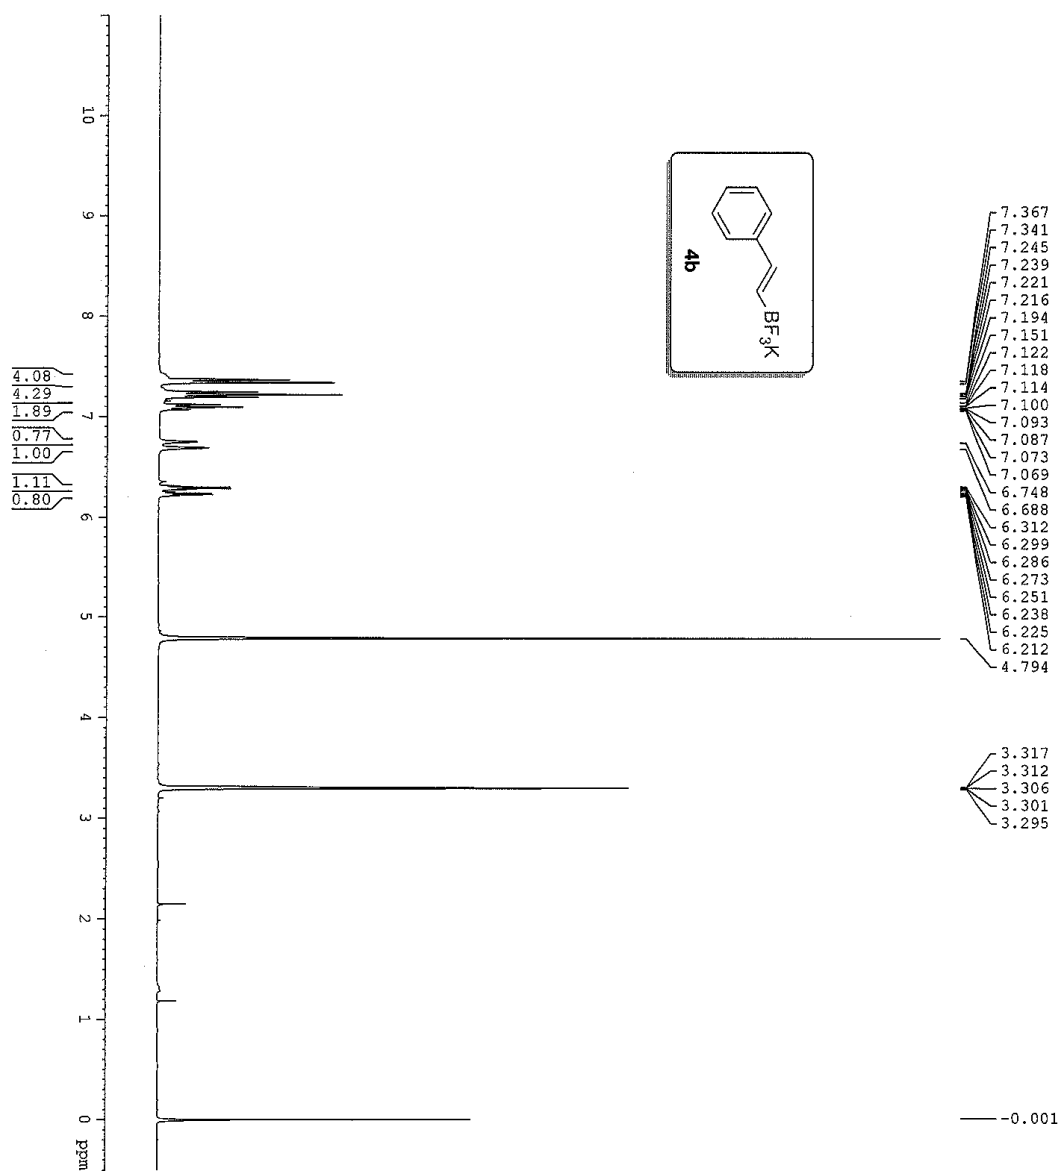

$^{13}\text{F}$  NMR of 4b in  $\text{CD}_3\text{OD}$

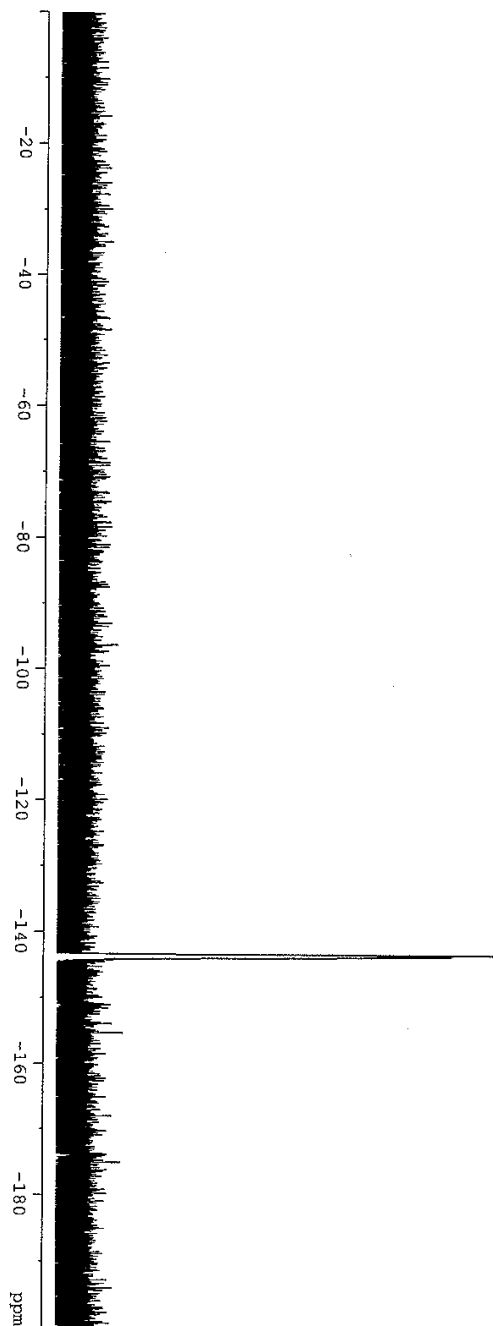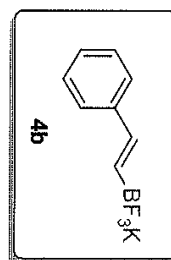

-143.482  
-143.514  
-143.732

$^1\text{H}$  NMR of 4c in  $\text{DMSO-}d_6$

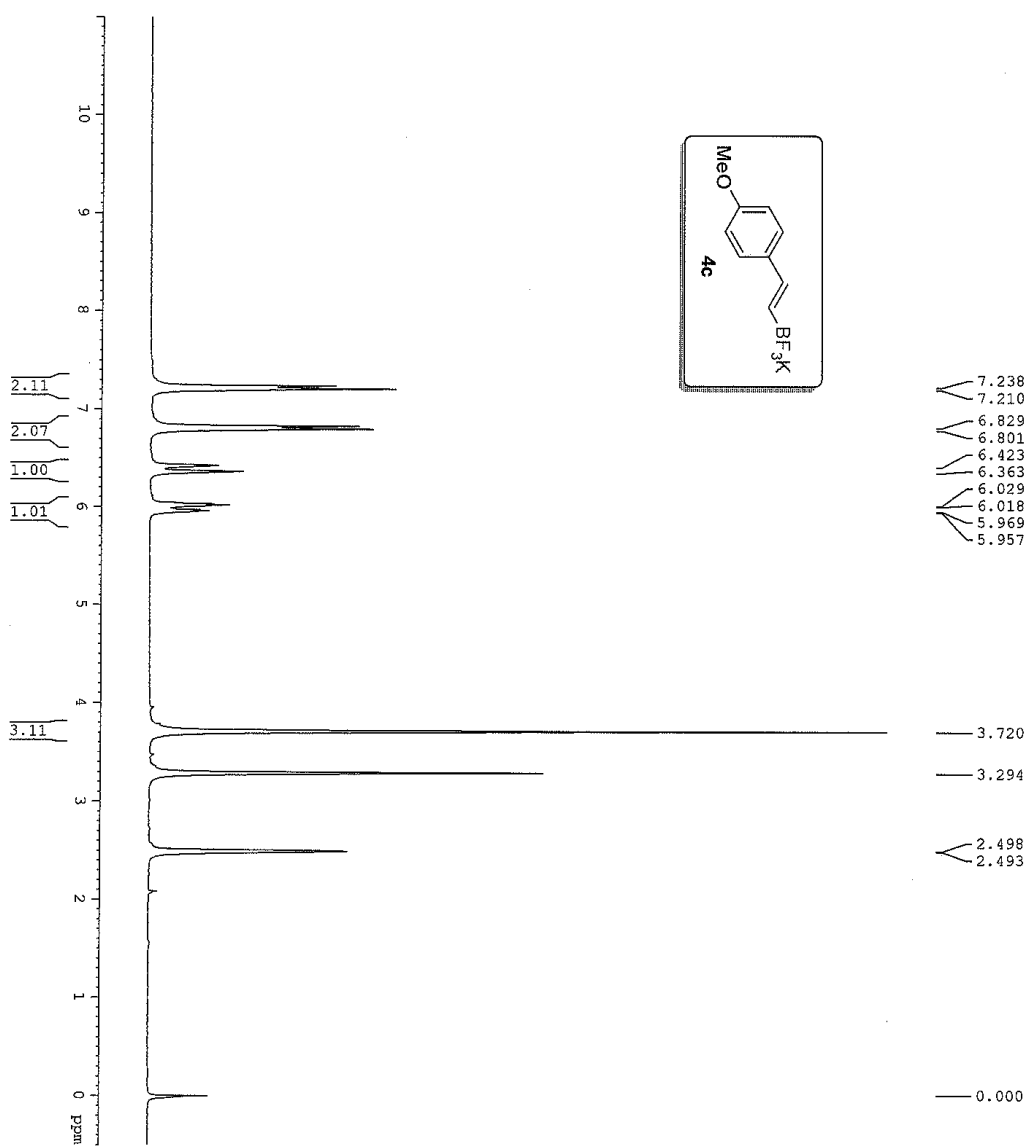

$^{19}\text{F}$  NMR of 4c in  $\text{DMSO-}d_6$

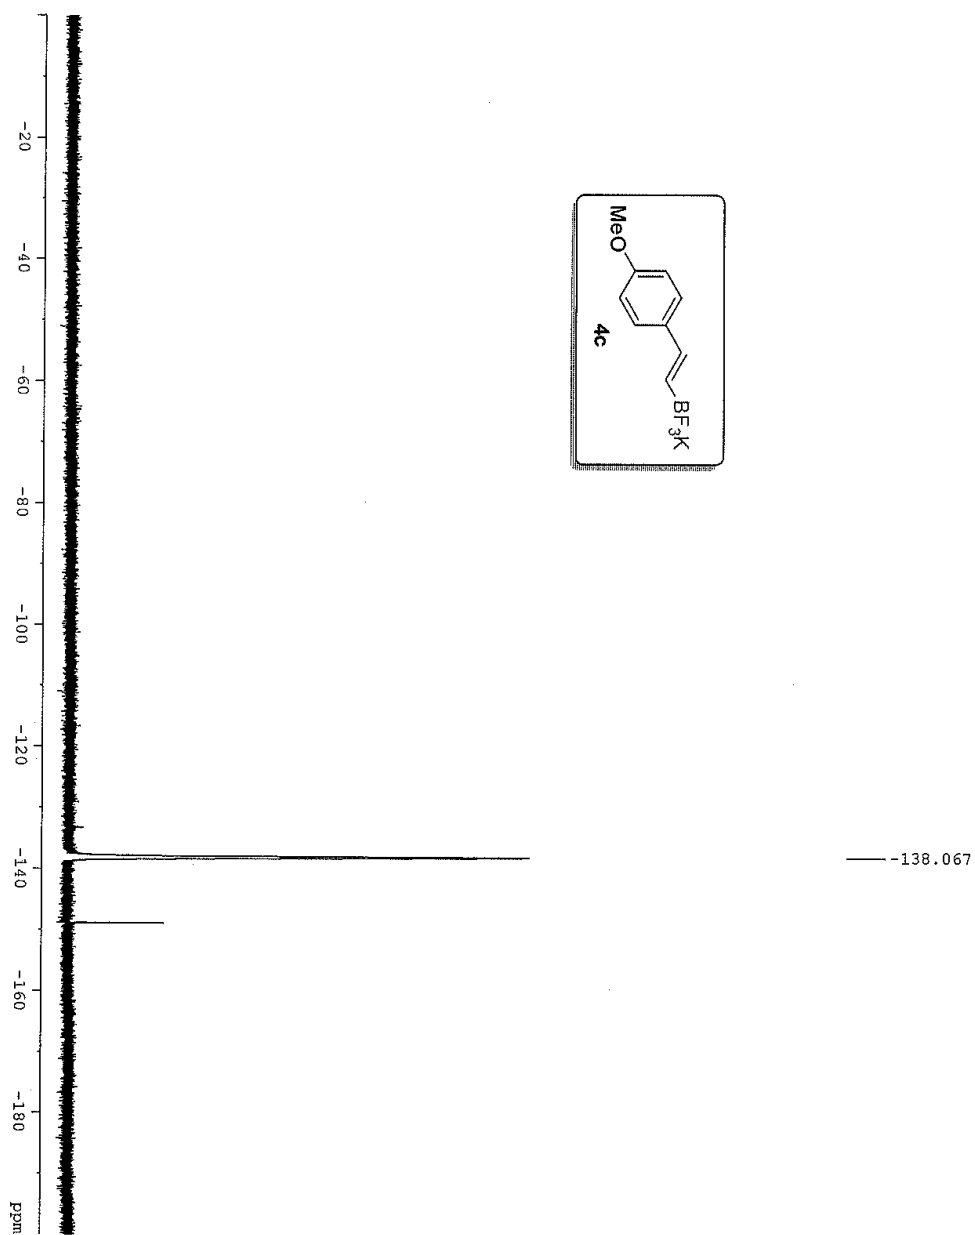

$^1\text{H}$  NMR of 4d in  $\text{DMSO-}d_6$

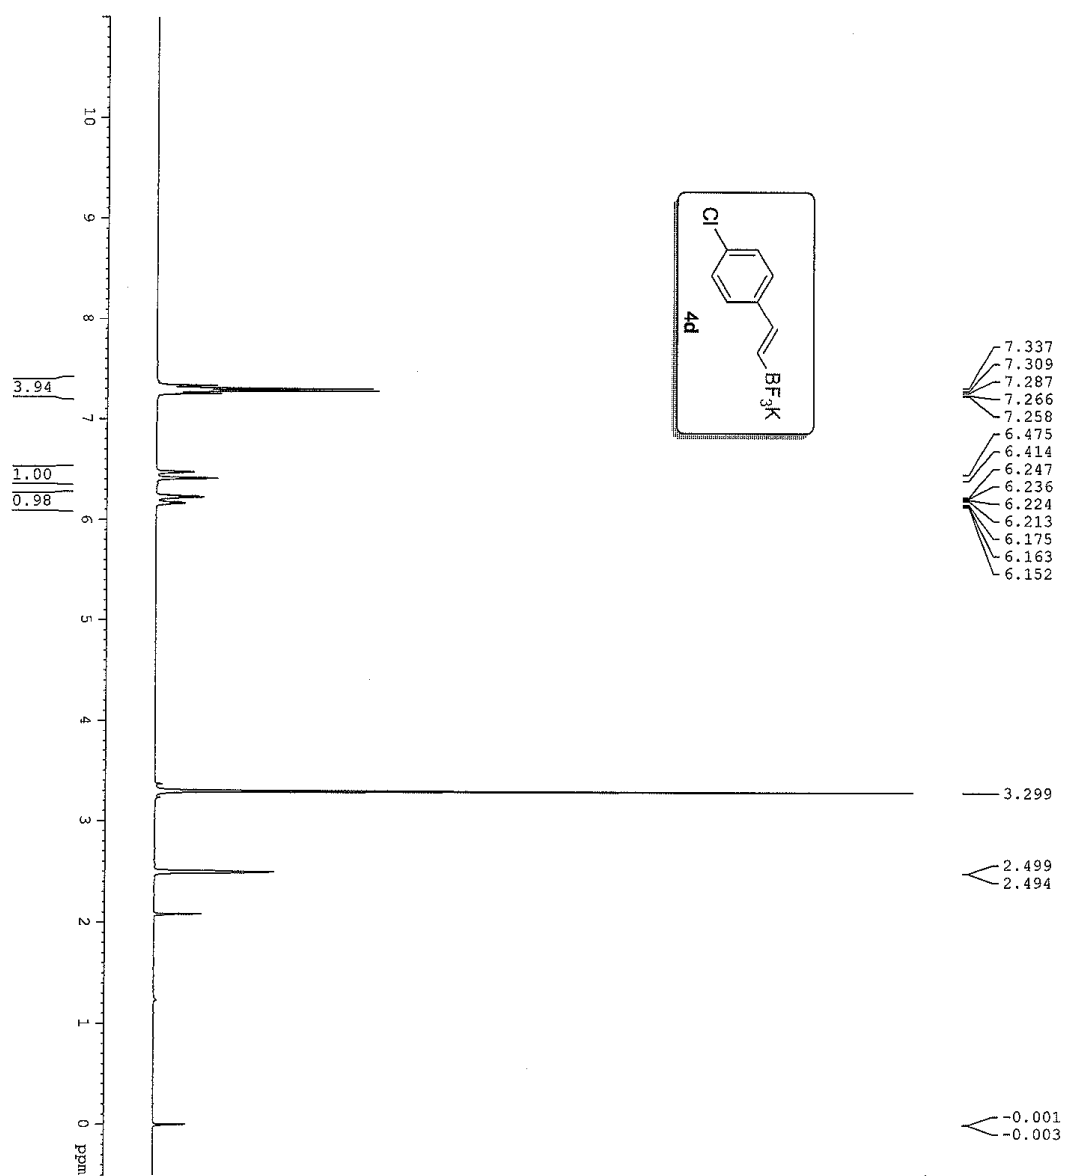

$^{19}\text{F}$  NMR of 4d in  $\text{DMSO-}d_6$

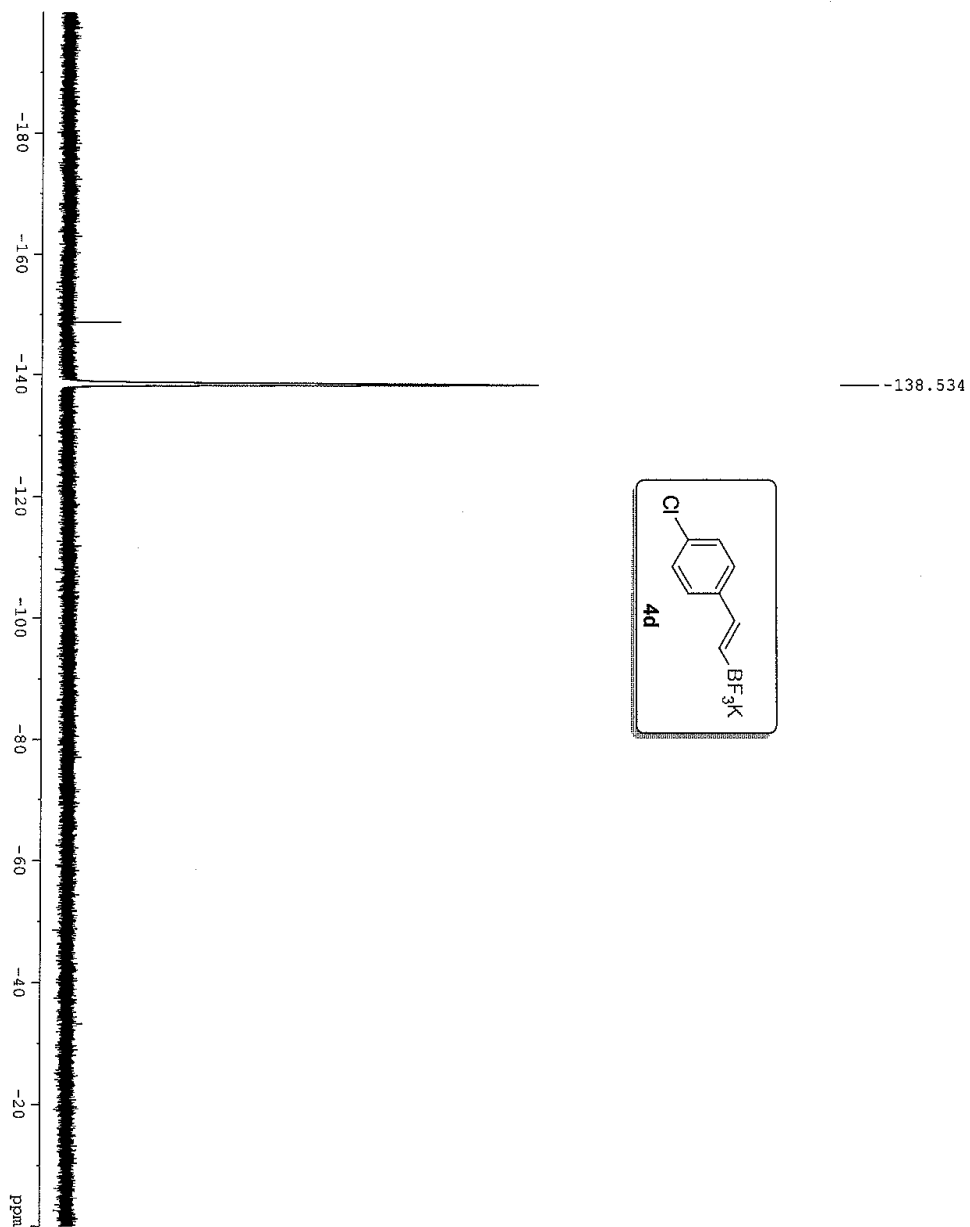

## GC-MS of crude 5a

Sample Information

Analysis : GC-MS  
Instrument : Shimadzu GC-2010  
Sited Admin :  
Analyzed by : 8/8/2013 12:15:50 PM  
Sample Type : Unknown  
Level # : 1  
Sample # :  
Sample Name : SC-MANS-I-12-1  
Sample ID : SC-MANS-I-12-1  
IS Amount : [1]=1  
Sample Amount : 1  
Dilution Factor : 1  
Vial # : 4  
Injection Volume : 3

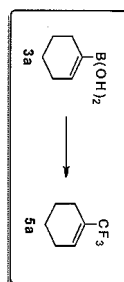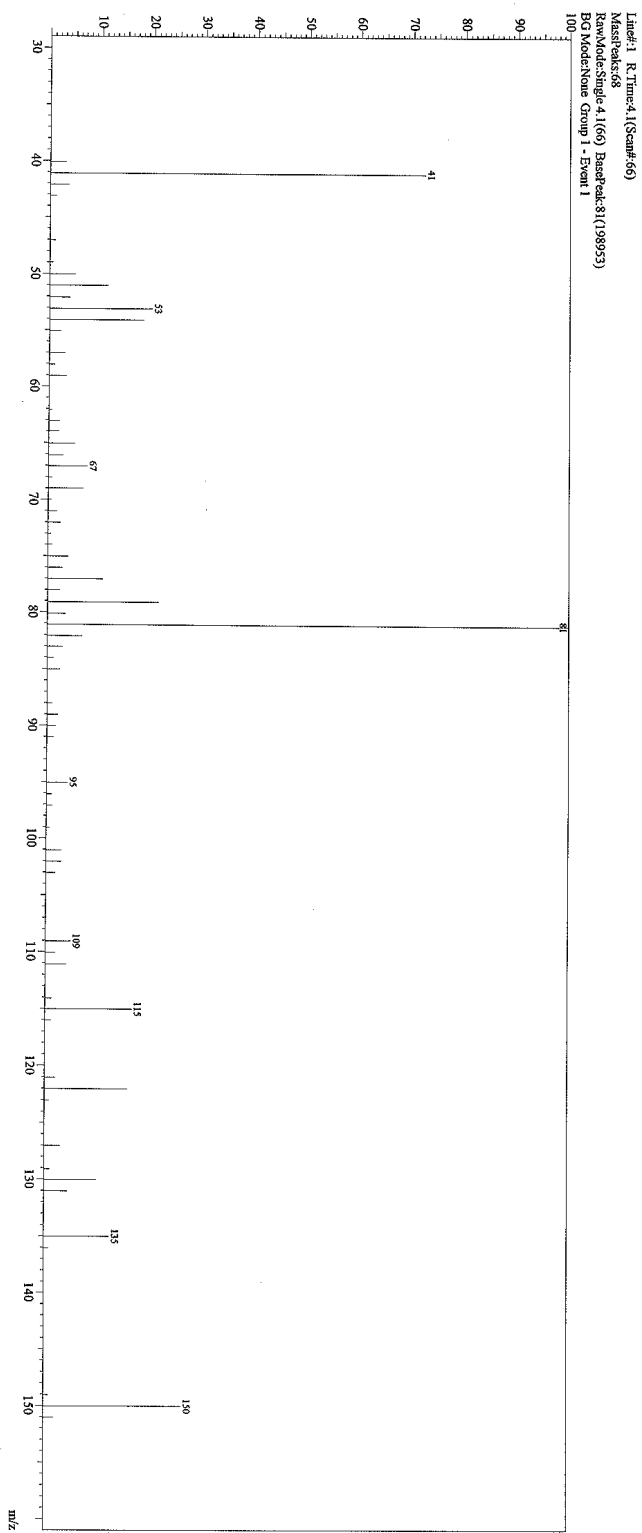

$^{19}\text{F}$  NMR yield of compound 5a  $(1.93/(1 \times 3) \times 100\% = 64\%)$  in  $\text{CDCl}_3$

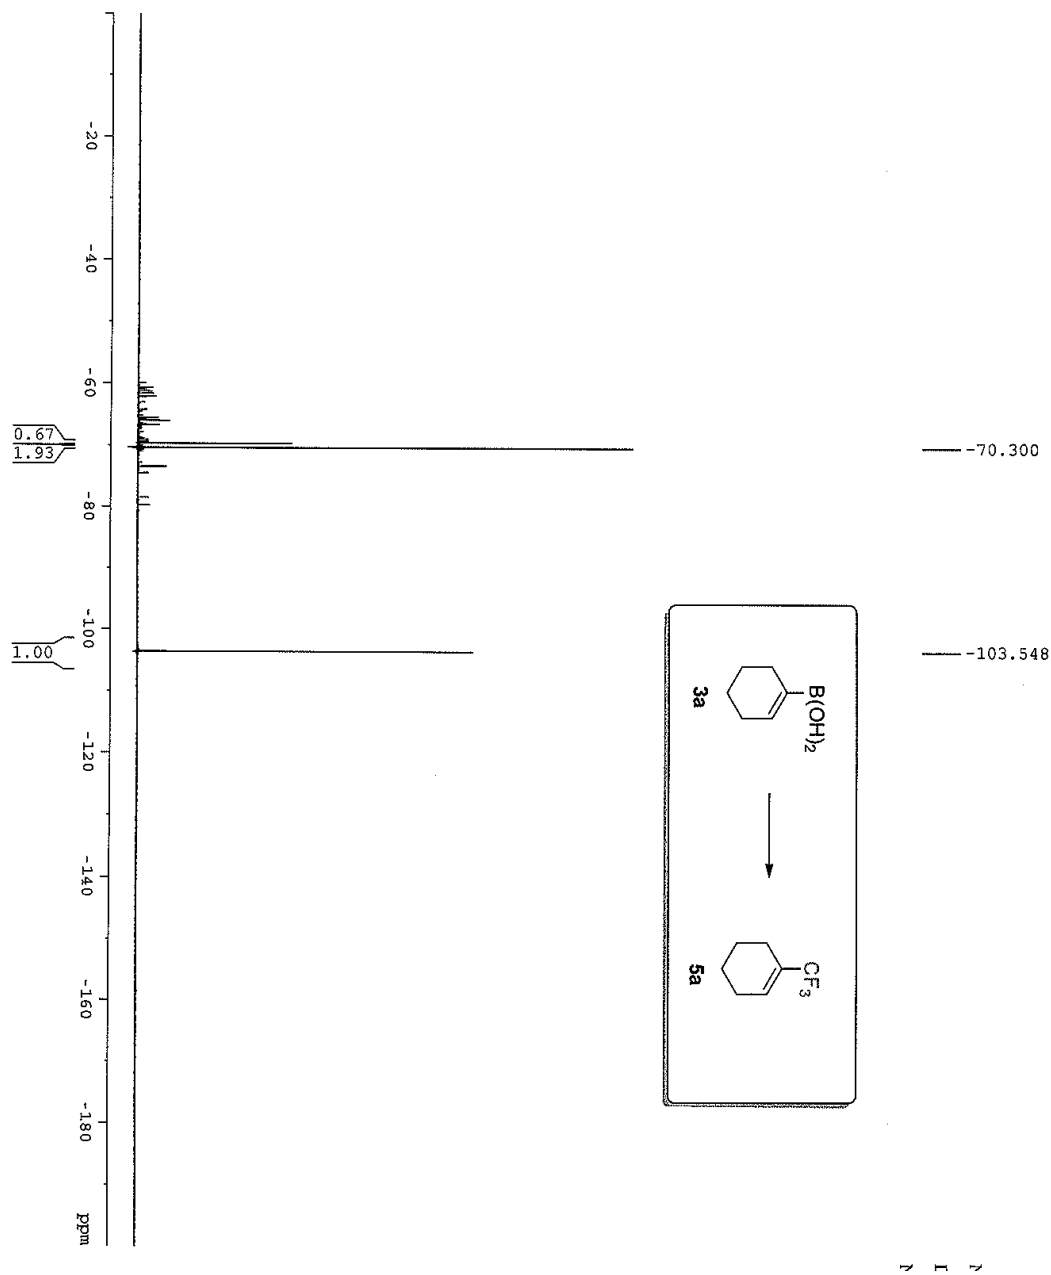



## GC-MS of crude 5a

Sample Information

Analysis : GC-MS  
Instrument : Shimadzu GC-2010  
Acquired by :  
Acquisition : 8/27/13 11:44:39 AM  
Sample Type : Unknown  
Level # : 1  
Sample Name : SC-MNS-I-16  
Sample ID : SC-MNS-I-16  
IS Amount : [1]=1  
Sample Amount :  
Dilution Factor : 1  
Vial # : 1  
Injection Volume : 3

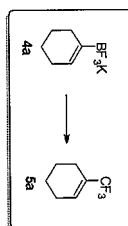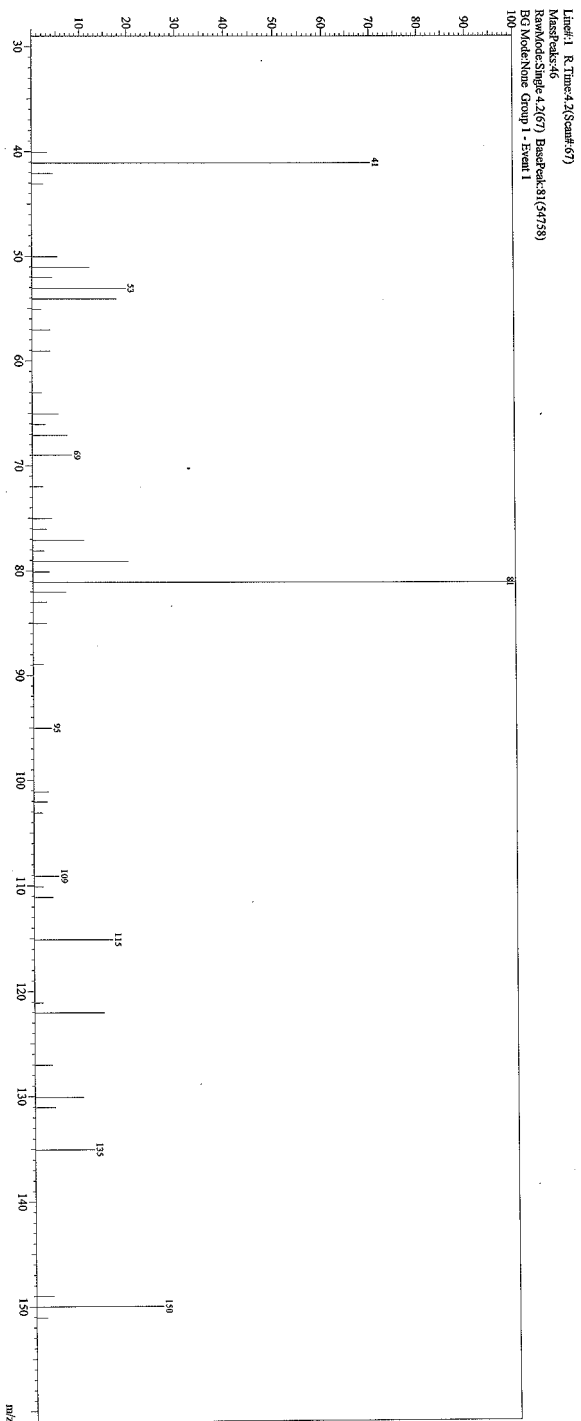

$^{19}\text{F}$  NMR of crude 5a in  $\text{CDCl}_3$

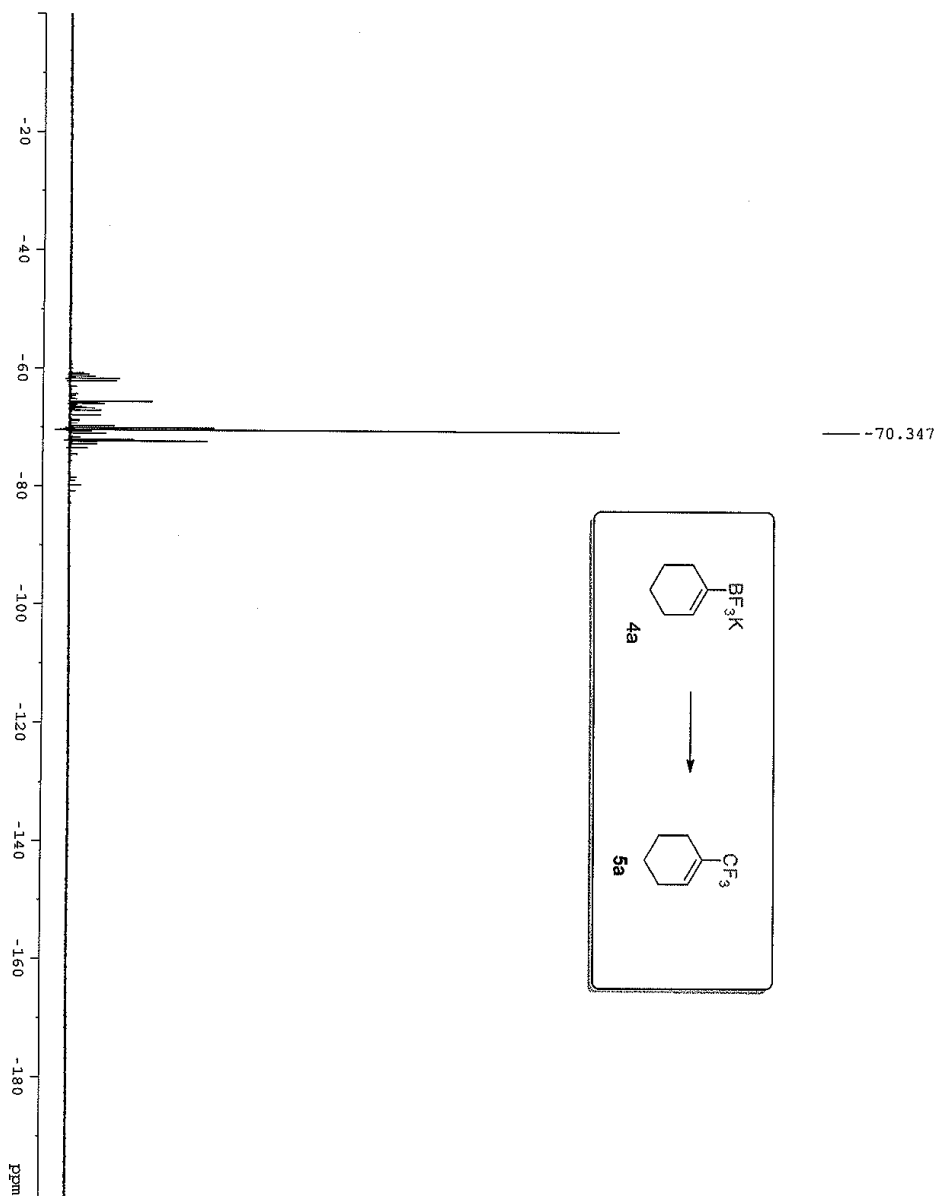

$^{19}\text{F}$  NMR yield of compound 2h  $(1.82/(1 \times 3) \times 100\% = 60\%)$  in  $\text{CDCl}_3$

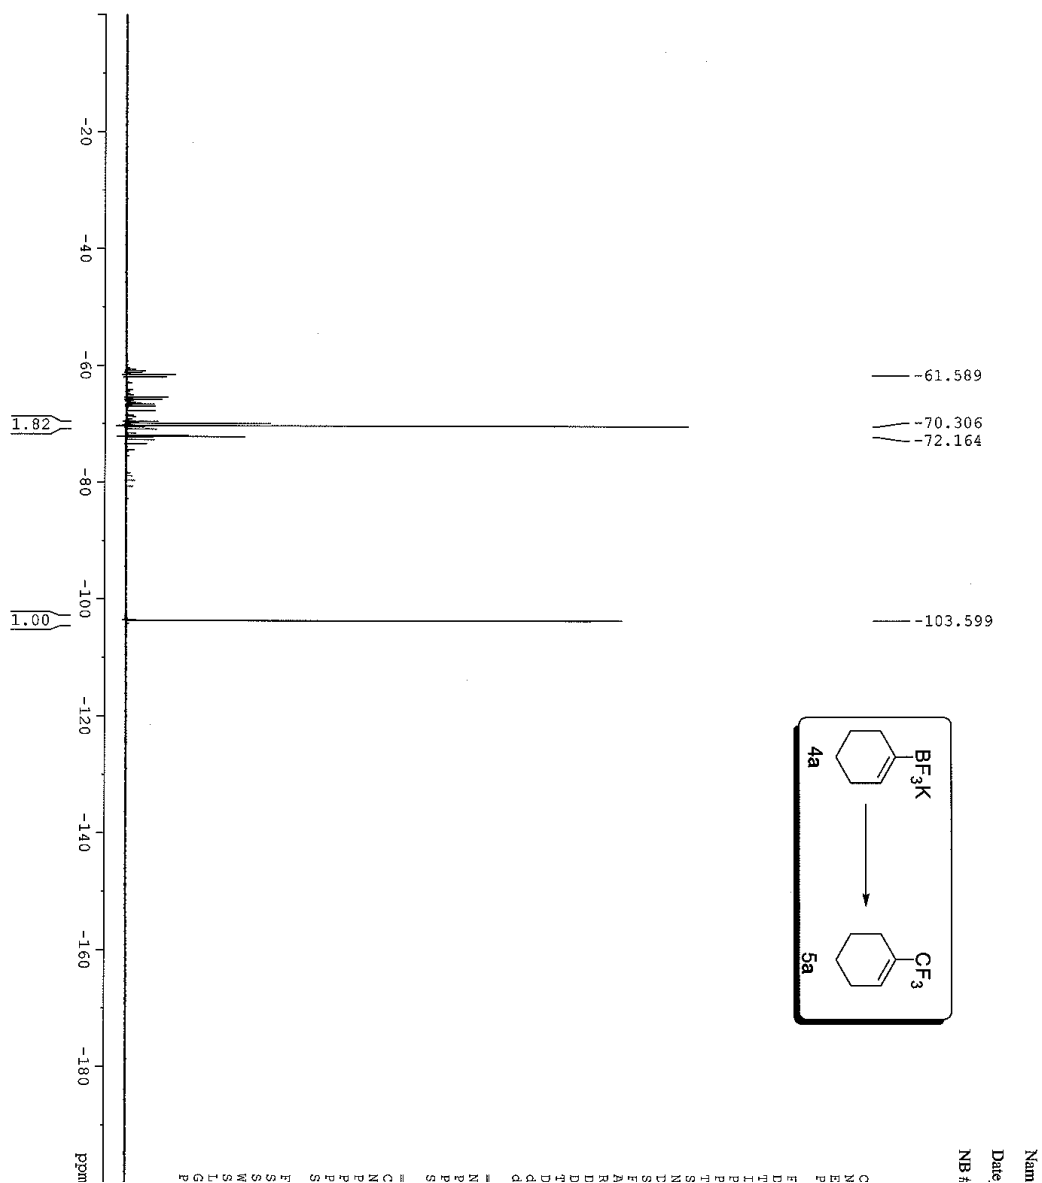

### GC-MS of crude 5b

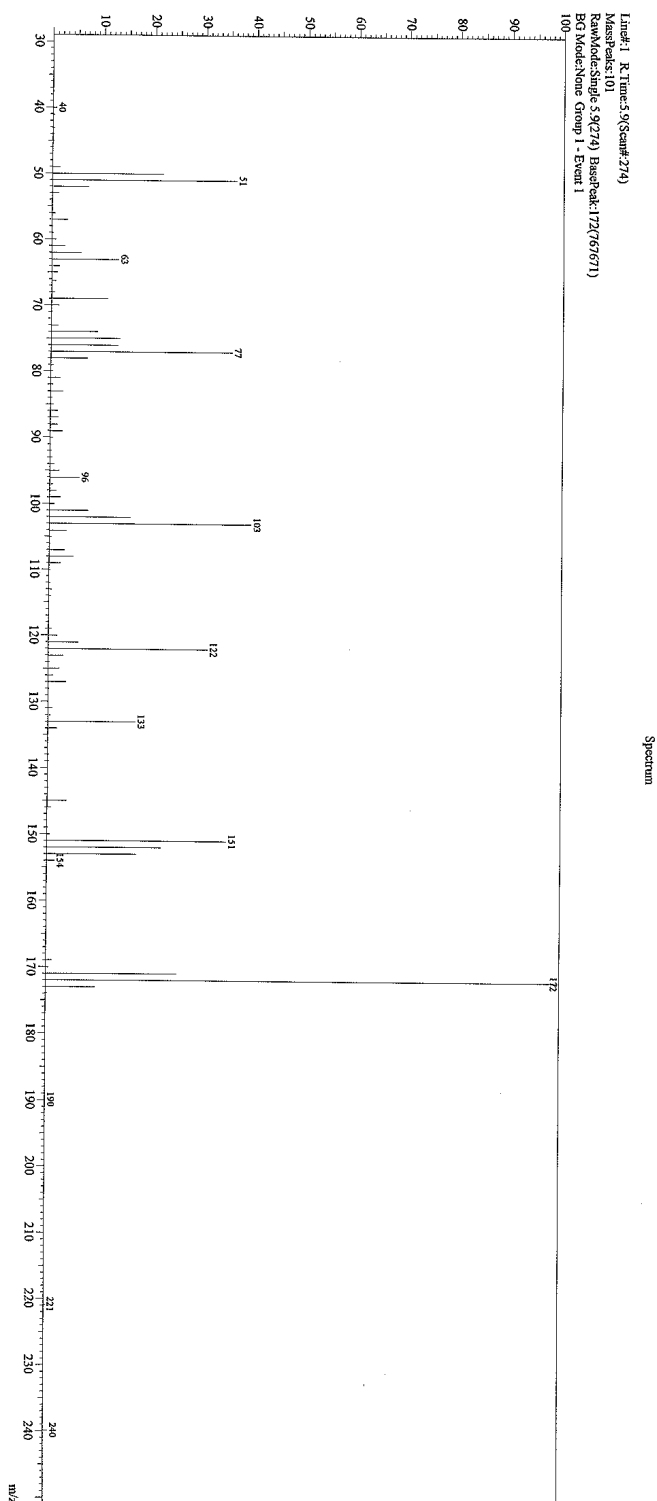

Sample Information

Analysis : GC-MS  
Instrument : Shimadzu GC-2010  
Analyzed by : Admin  
Analyzed : 8/8/2013 12:51:08 PM  
Sample Type : Unknown  
Level # : 1  
Sample Name : SG-RBS-F-61-1  
Sample ID : SG-RBS-F-61-1  
IS Amount : [1]=1  
Sample Amount : 1  
Dilution Factor : 1  
Vial # : 5  
Injection Volume : 3

Spectrum

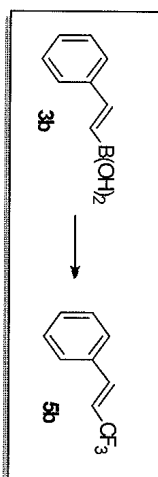

**$^{19}\text{F}$  NMR of crude 5b in  $\text{CDCl}_3$**

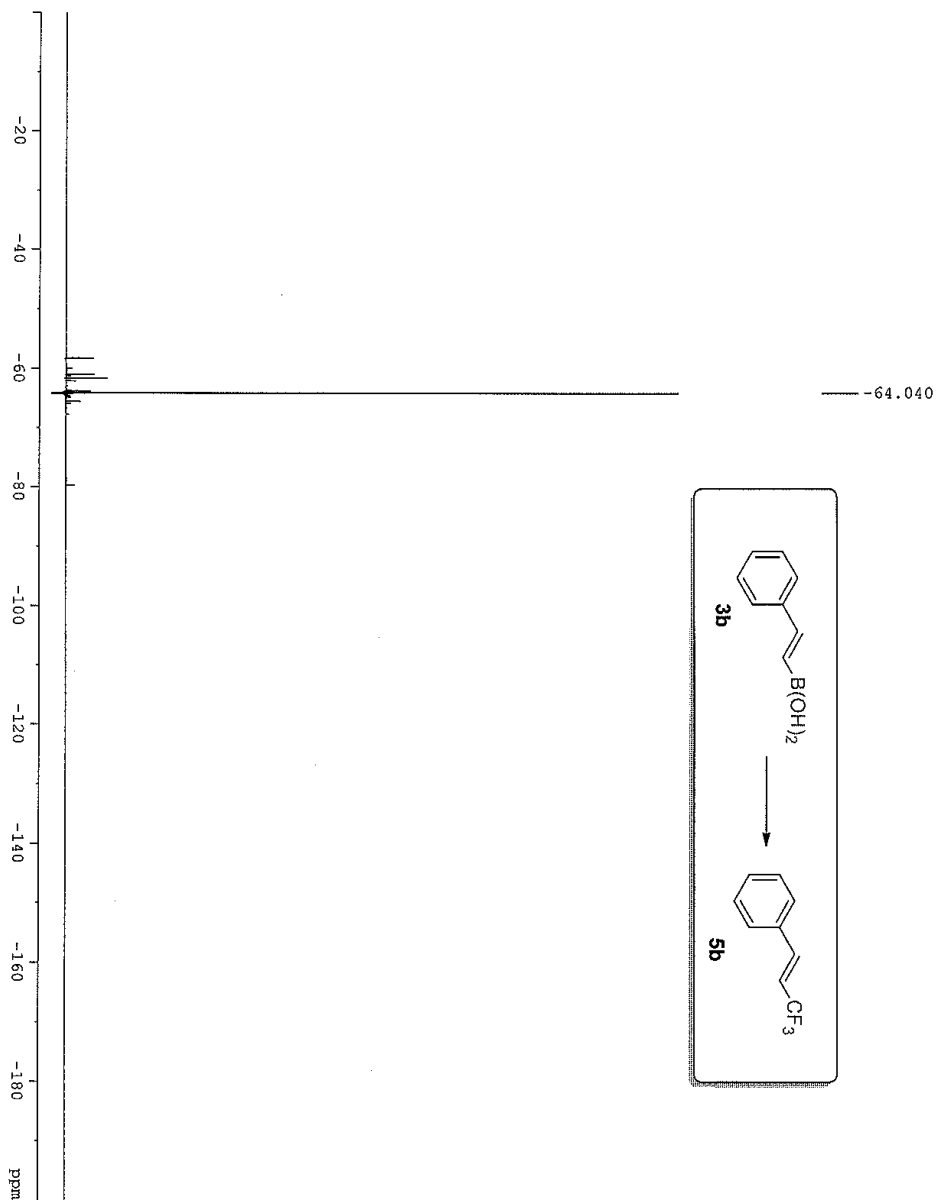

$^{19}\text{F}$  NMR yield of compound **5b** ( $2.77/(1 \times 3) \times 100\% = 92\%$ ) in  $\text{CDCl}_3$

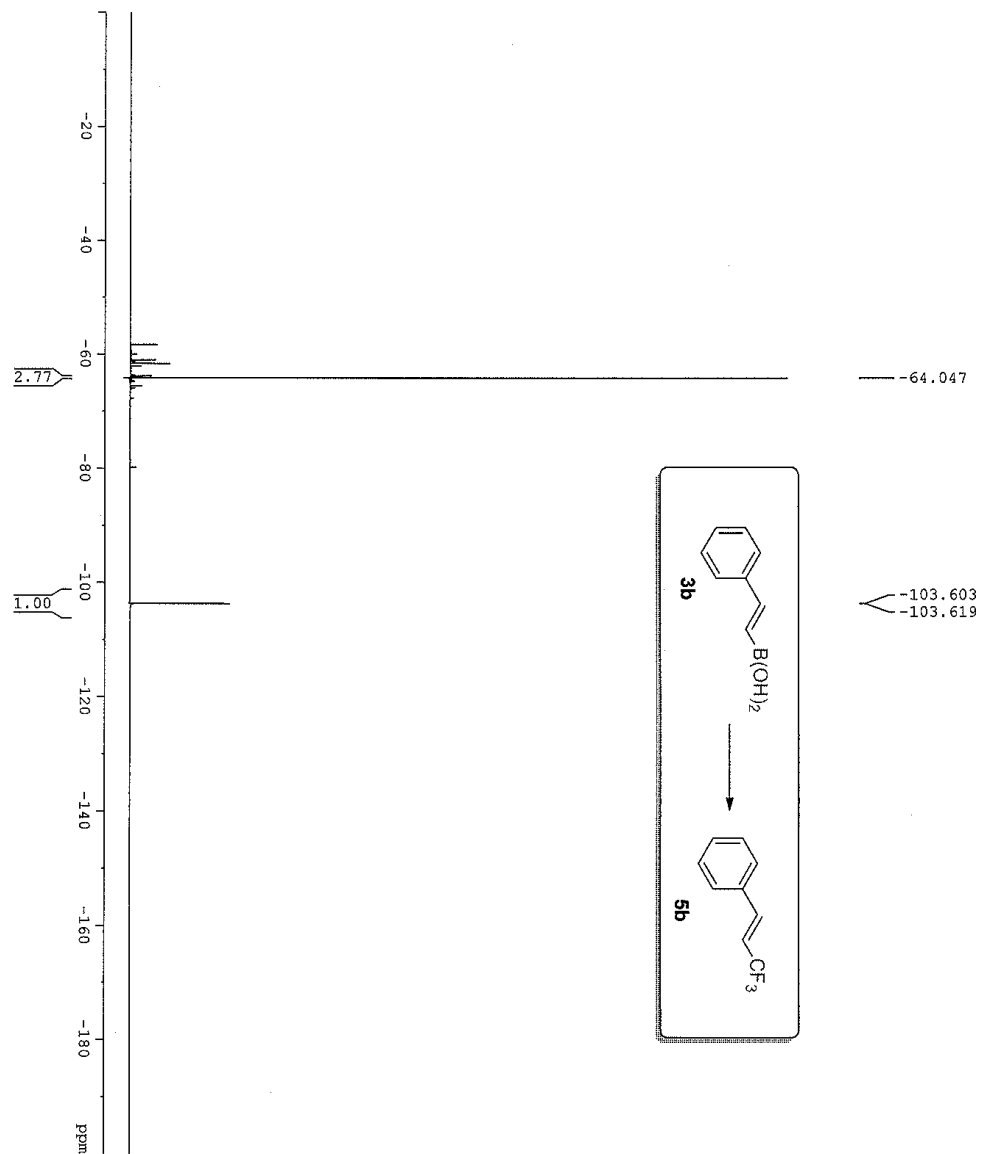

$^1\text{H}$  NMR of 5b in  $\text{CDCl}_3$

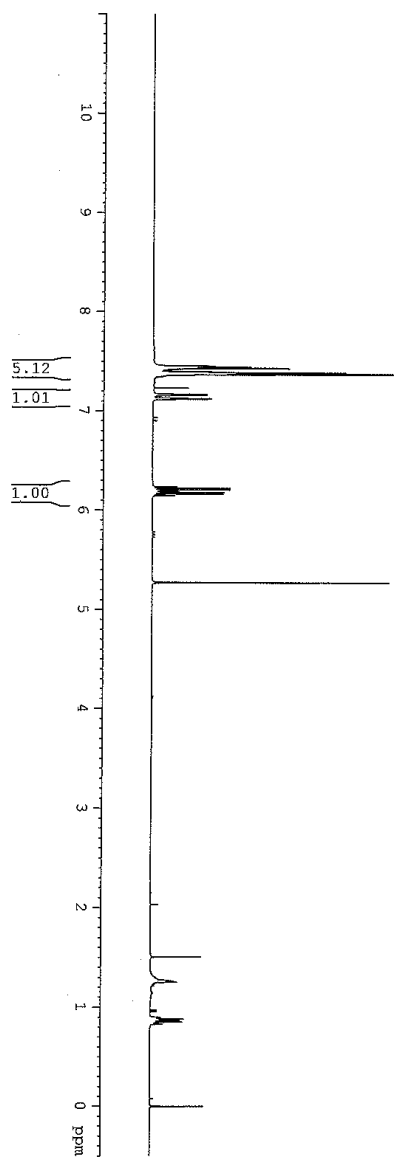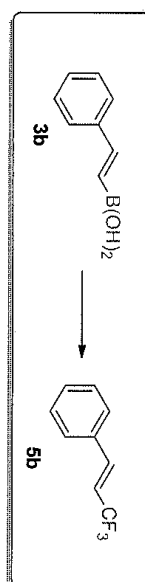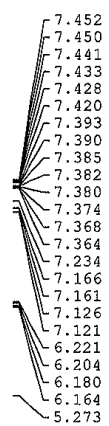

**<sup>19</sup>F NMR of isolated 5b in CDCl<sub>3</sub>**

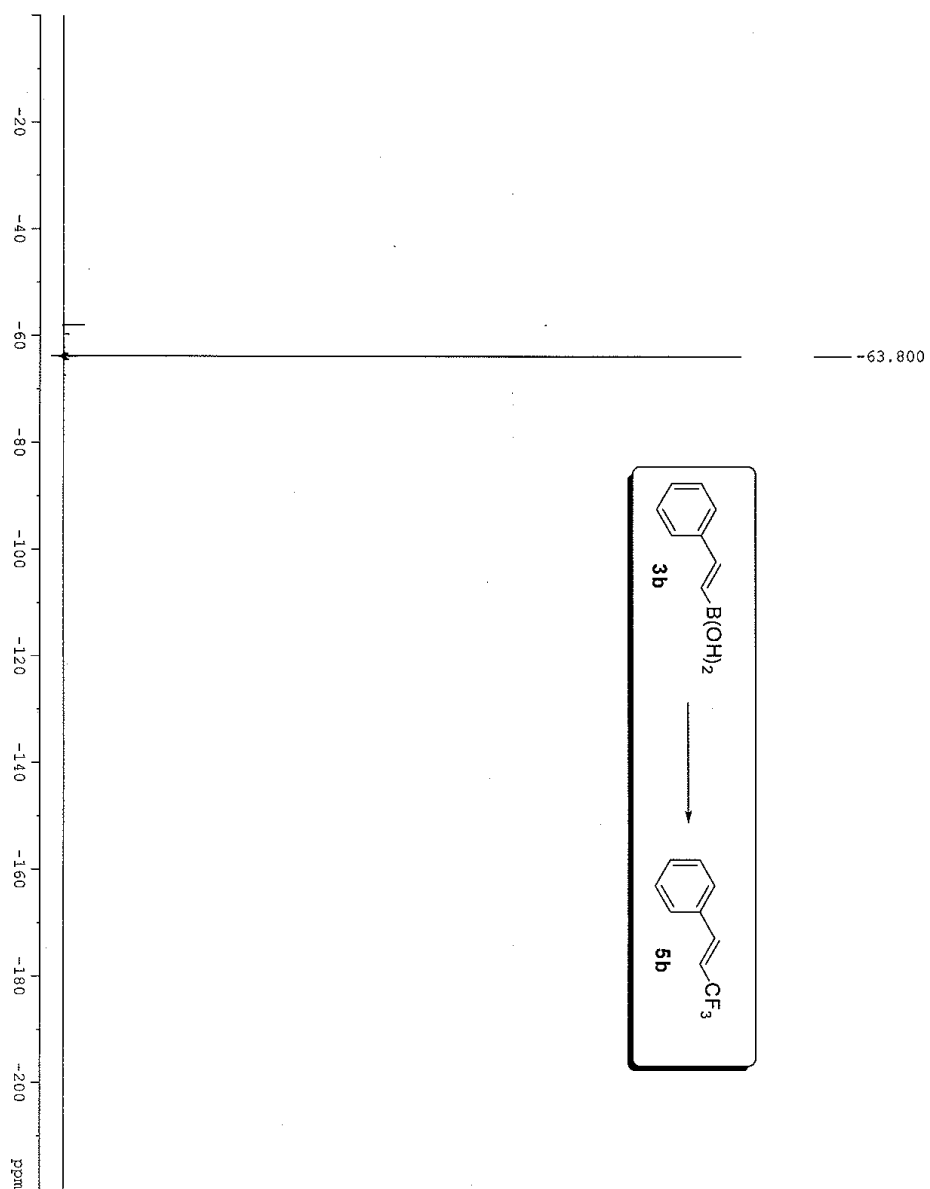



## GC-MS of crude 5b

Analysis : GC-MS  
Instrument : Shimadzu GC-2010  
Analysis by : Shimadzu  
Analysis Date : 20/2013 12:55:19 PM  
Sample Name : Unknown  
Sample # : 1  
Sample Name : SG-RRS-F-63  
Sample ID : SG-RRS-F-63  
IS Amount : [ ]=1  
Sample Amount : 1  
Dilution Factor : 1  
Vial # : 1  
Injection Volume : 3

### Sample Information

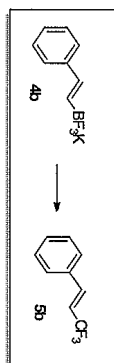

### Spectrum

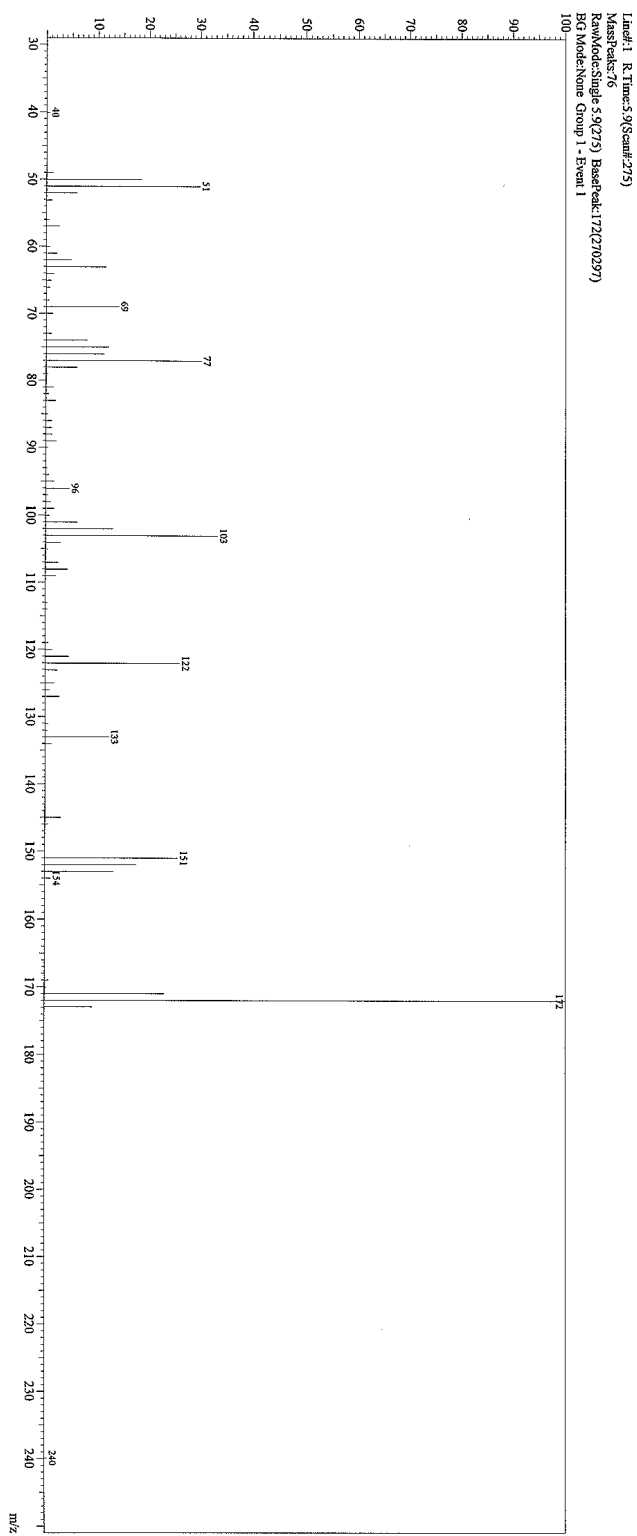

$^{19}\text{F}$  NMR of crude **5b** in  $\text{CDCl}_3$

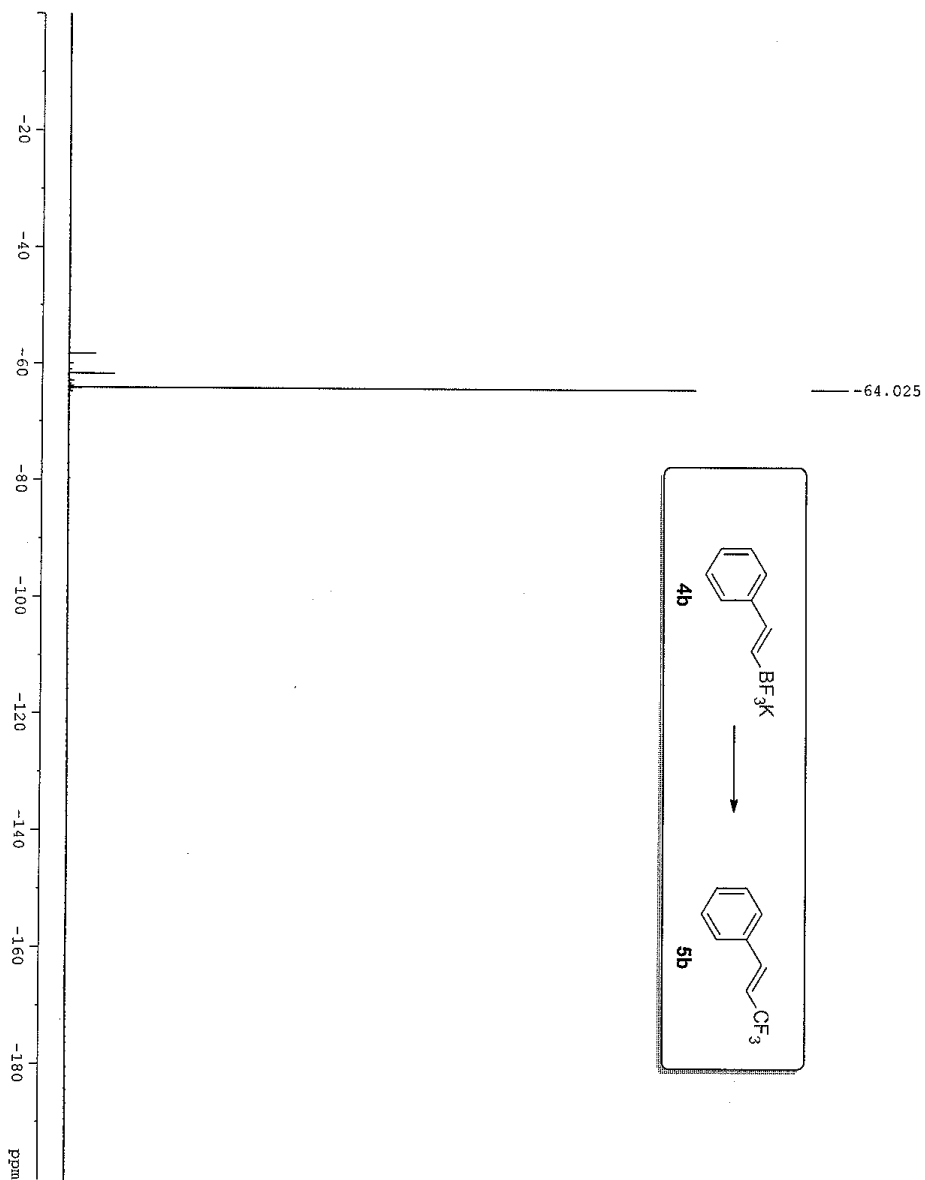

$^{19}\text{F}$  NMR yield of compound **5b**  $(2.95/(1 \times 3) \times 100\% = 98\%)$  in  $\text{CDCl}_3$

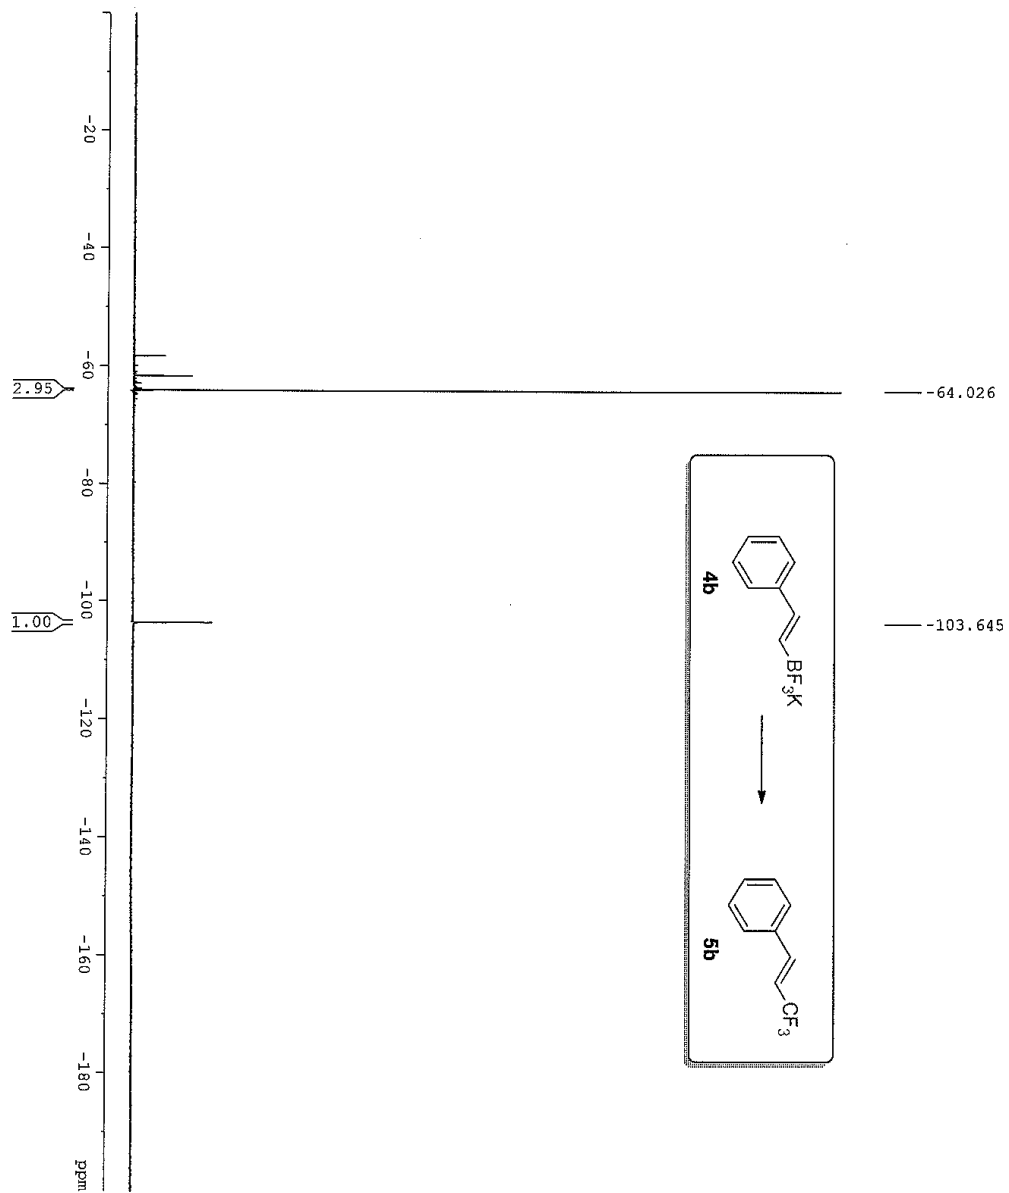

## GC-MS of crude 5c

Analysis : GC-MS  
Instrument : Shimadzu GC-2010  
Analyzed by : Admin  
Analyzed : 8/30/2013 1:06:58 PM  
Sample Type : Unknown  
Level # : 1  
Sample Name : SG-RJSS-F-64  
Sample ID : SG-RJSS-F-64  
IS Amount : [1]-1  
Sample Amount : 1  
Injection Factor : 1  
Injection Volume : 5

### Sample Information

### Spectrum

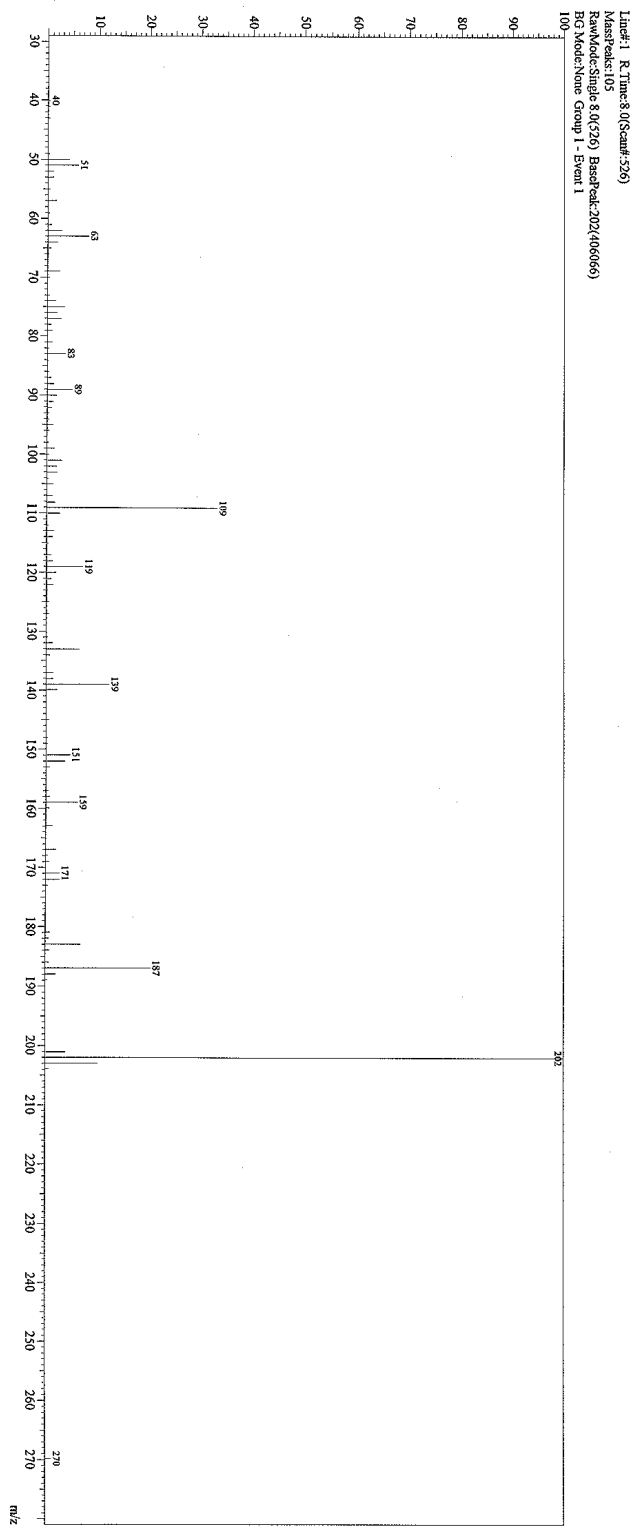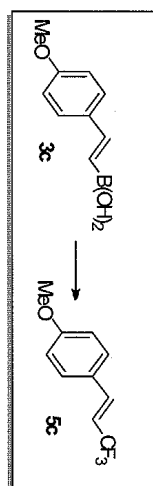

$^{19}\text{F}$  NMR yield of compound 5c  $(2.81/(1 \times 3) \times 100\% = 93\%)$  in  $\text{CDCl}_3$

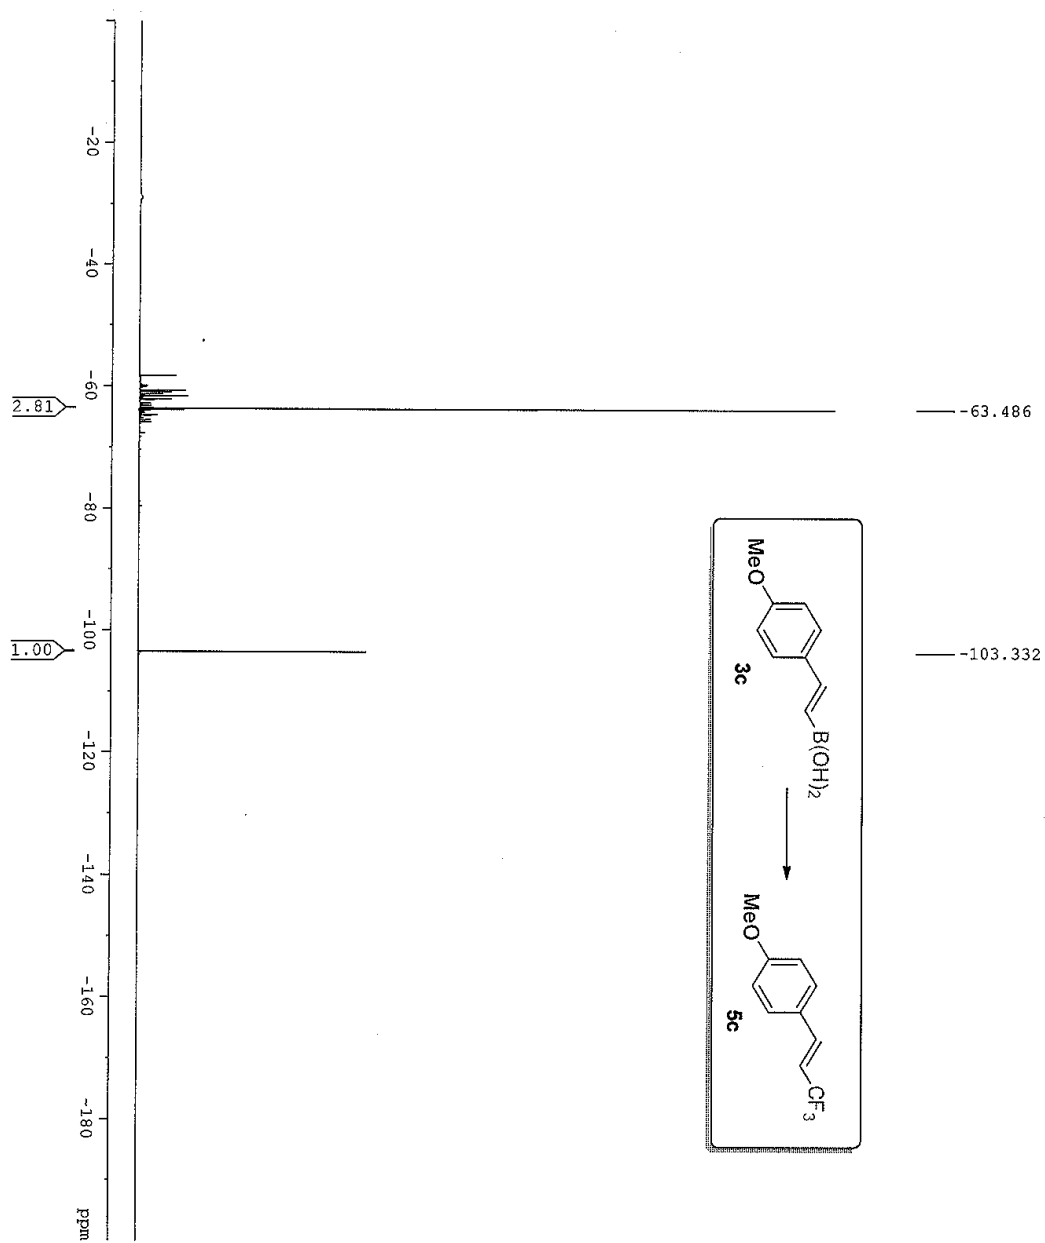

$^1\text{H}$  NMR of 5c in  $\text{CDCl}_3$

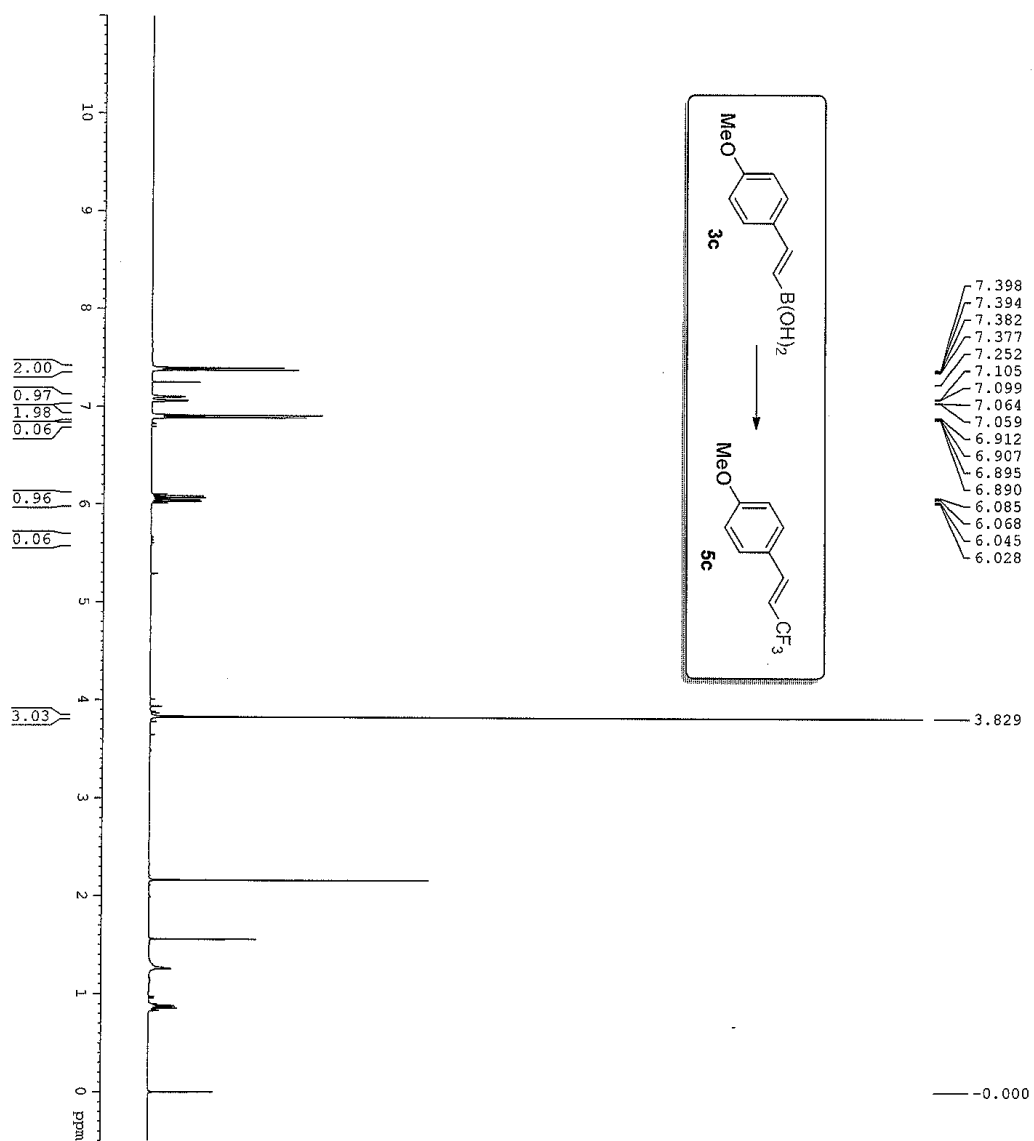

$^{19}\text{F}$  NMR of isolated **5c** in  $\text{CDCl}_3$

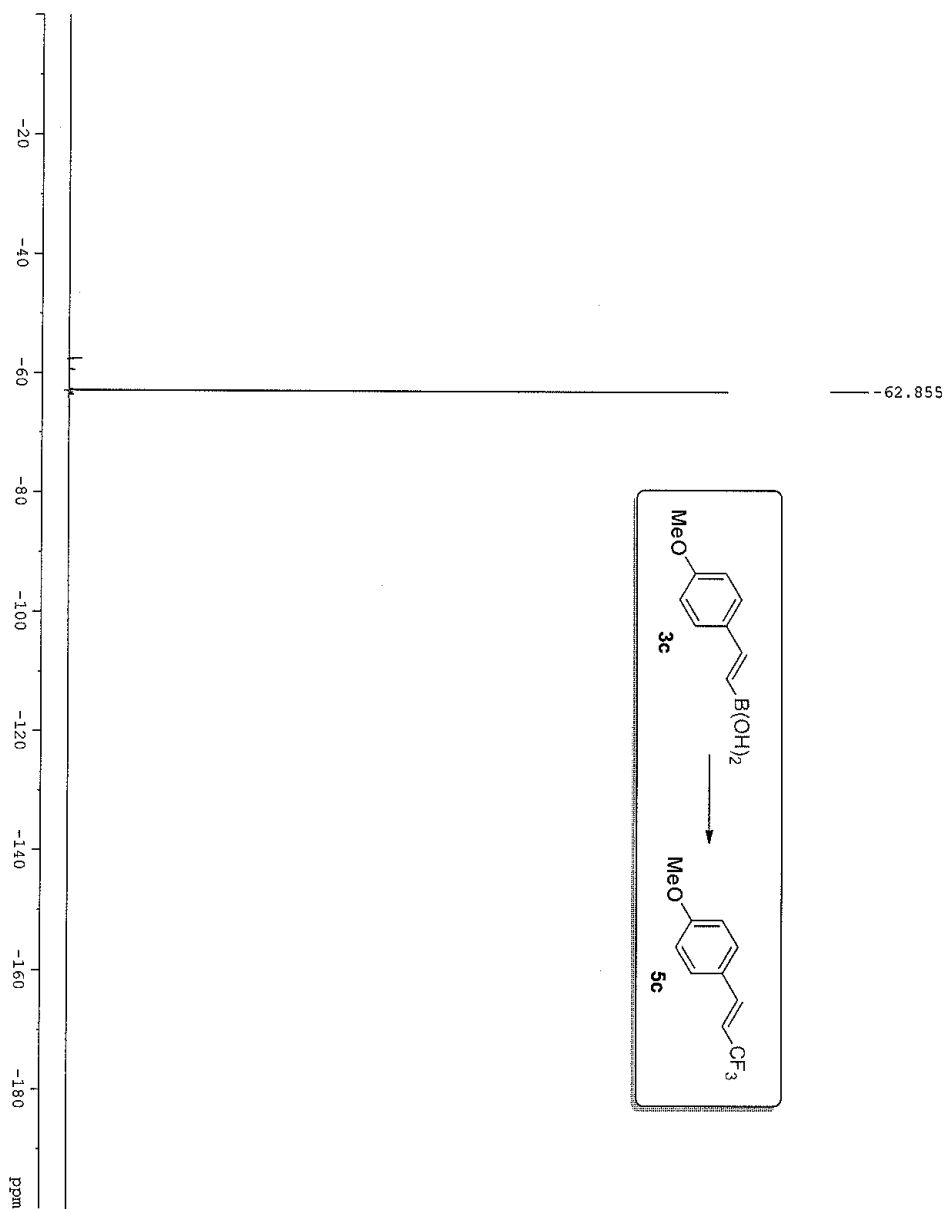

## GC-MS of crude 5c

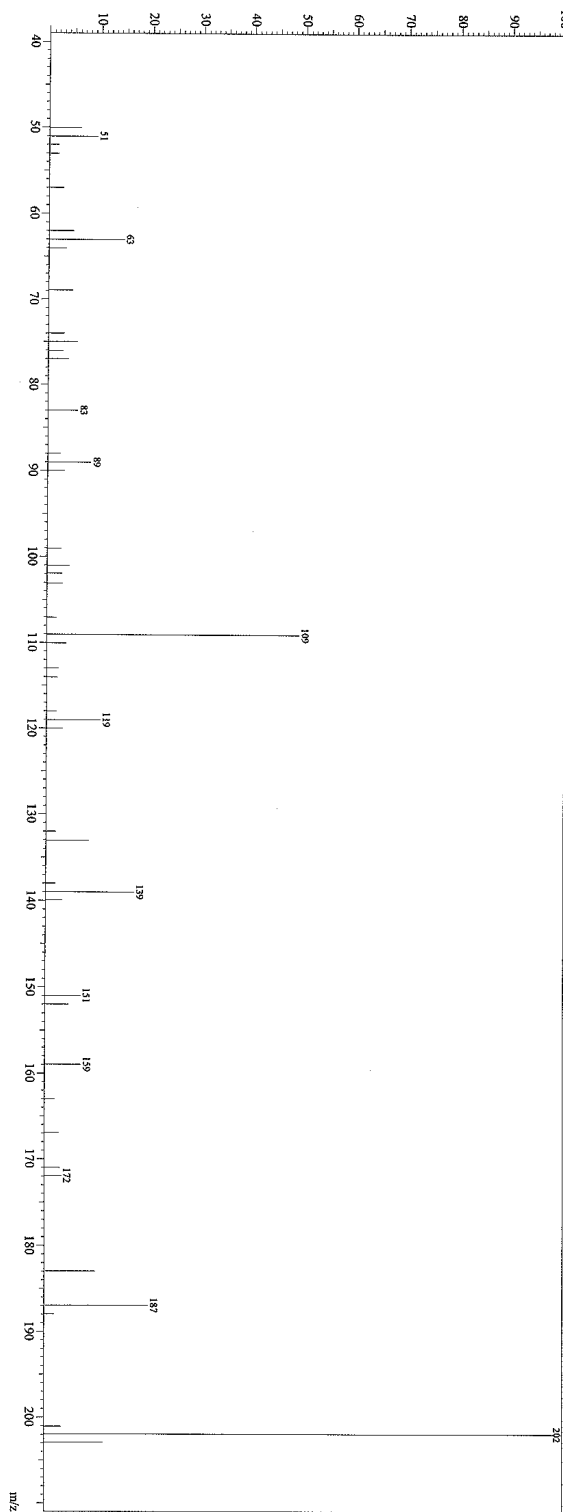

Line# 1, R-Time: 7.9 (Scan# 317)  
MassPeaks: 47  
RawMode: Simple 7.9(617) BasePeak: 202(54339)  
BG Model: None Group 1 - Event 1

Spectrum

Analysis : GC-MS  
Instrument : Shimadzu GC-2010  
Analyzed by : Adina  
Analyzed : 8/30/2013 1:41:34 PM  
Sample Type : Unknown  
Level # : 1  
Sample Name : SG-RBS-F-68  
Sample ID : SG-RBS-F-68  
IS Amount : [0] ml  
Sample Amount : 1  
Dilution Factor : 1  
Val # : 2  
Injection Volume : 5

Sample Information

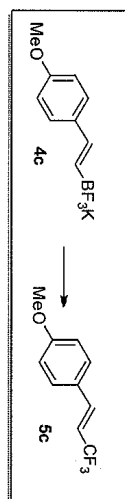



$^{19}\text{F}$  NMR of crude **5c** in  $\text{CDCl}_3$

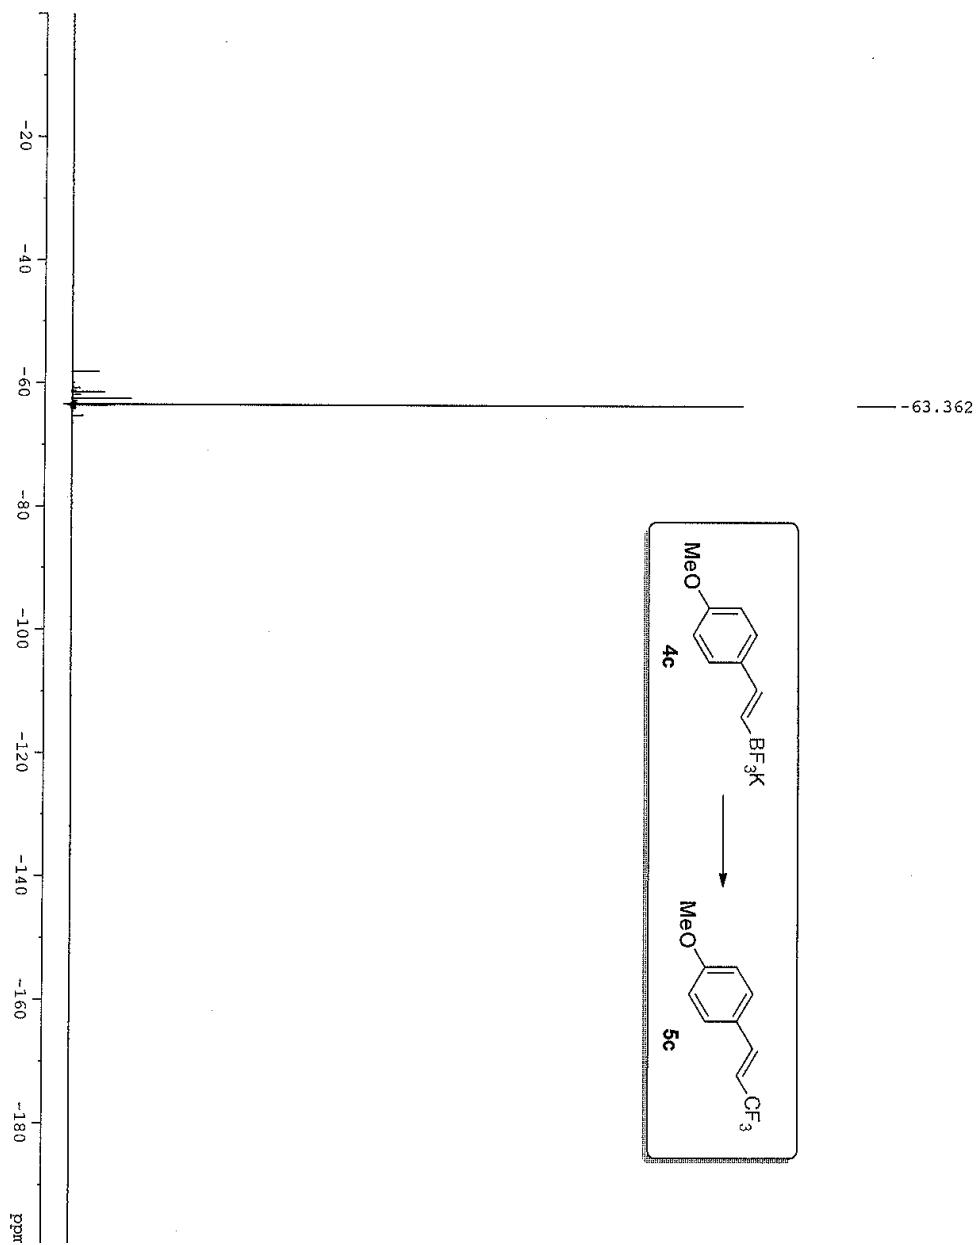

$^{19}\text{F}$  NMR yield of compound **5c** ( $2.82/(1 \times 3) \times 100\% = 94\%$ ) in  $\text{CDCl}_3$

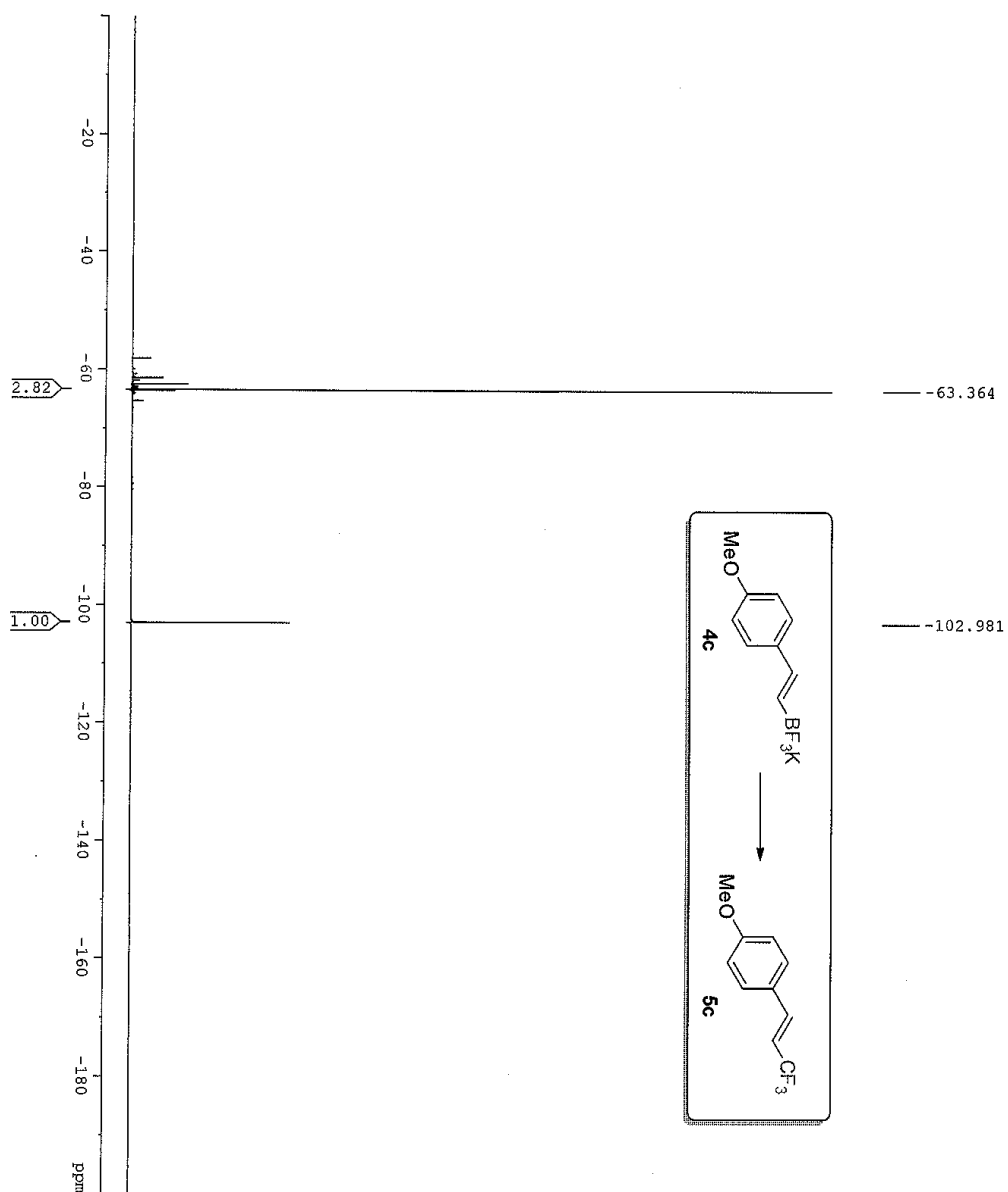

### GC-MS of crude 5d

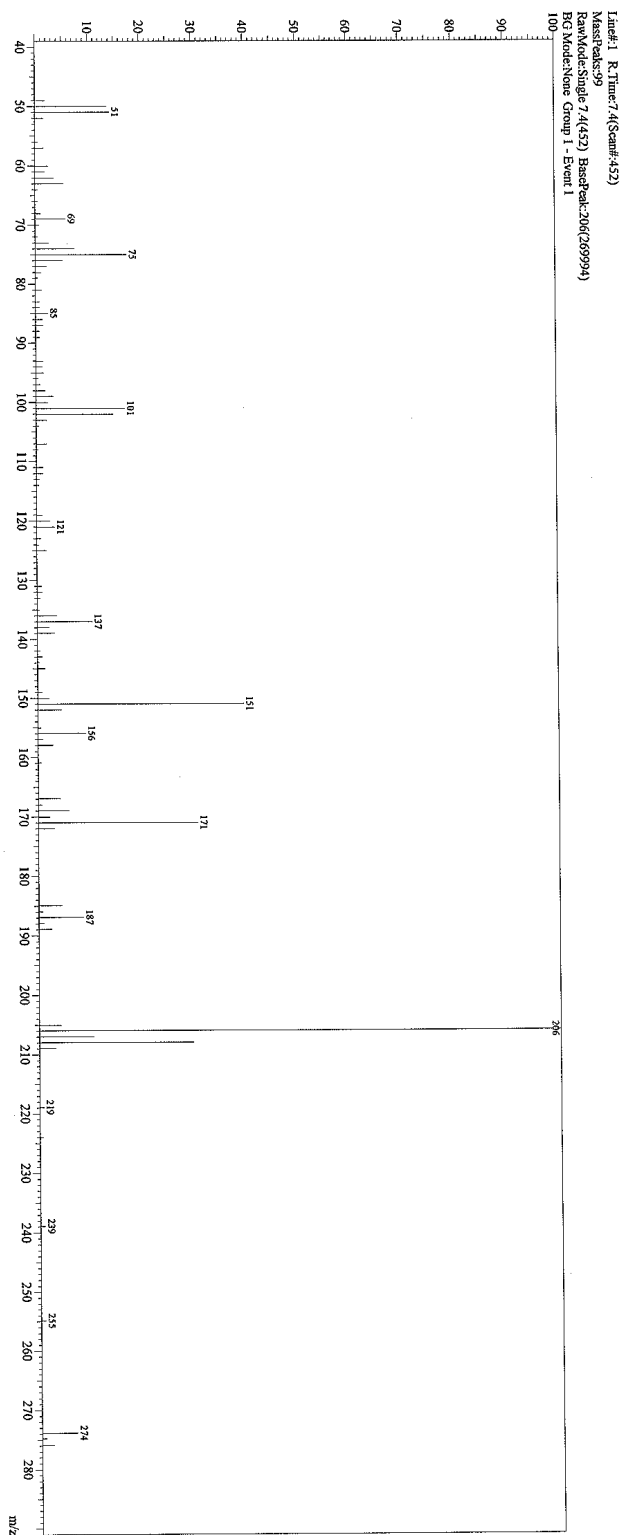

Spectrum

Analysis : GC-MS  
Instrument : Shimadzu GC-2010  
Analyzed by : Adam  
Analyzed : 7/6/2013 5:17:23 PM  
Sample Name : Unknown  
Sample Type : 1  
Sample Name : SG-RBS-F-65-1  
Sample ID : SG-RBS-F-65-1  
IS Amount : [1]-1  
Sample Amount : 1  
Dilution Factor : 1  
Val # : 2  
Injection Volume : 5

Sample Information

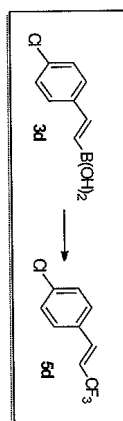

$^{19}\text{F}$  NMR yield of compound 5d  $(2.58/(1 \times 3) \times 100\% = 86\%)$  in  $\text{CDCl}_3$

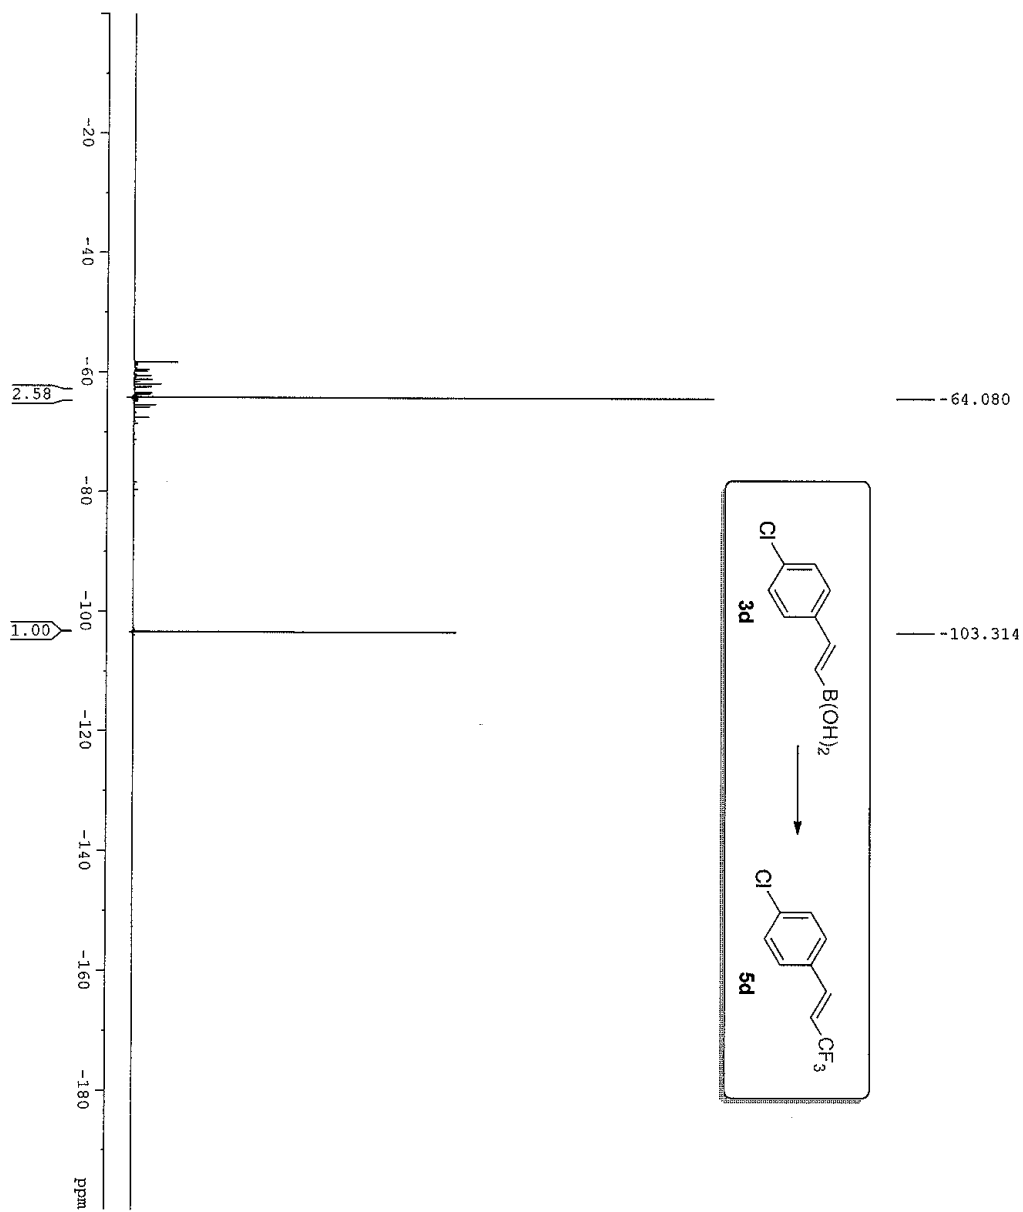

$^1\text{H}$  NMR of 5c in  $\text{CDCl}_3$

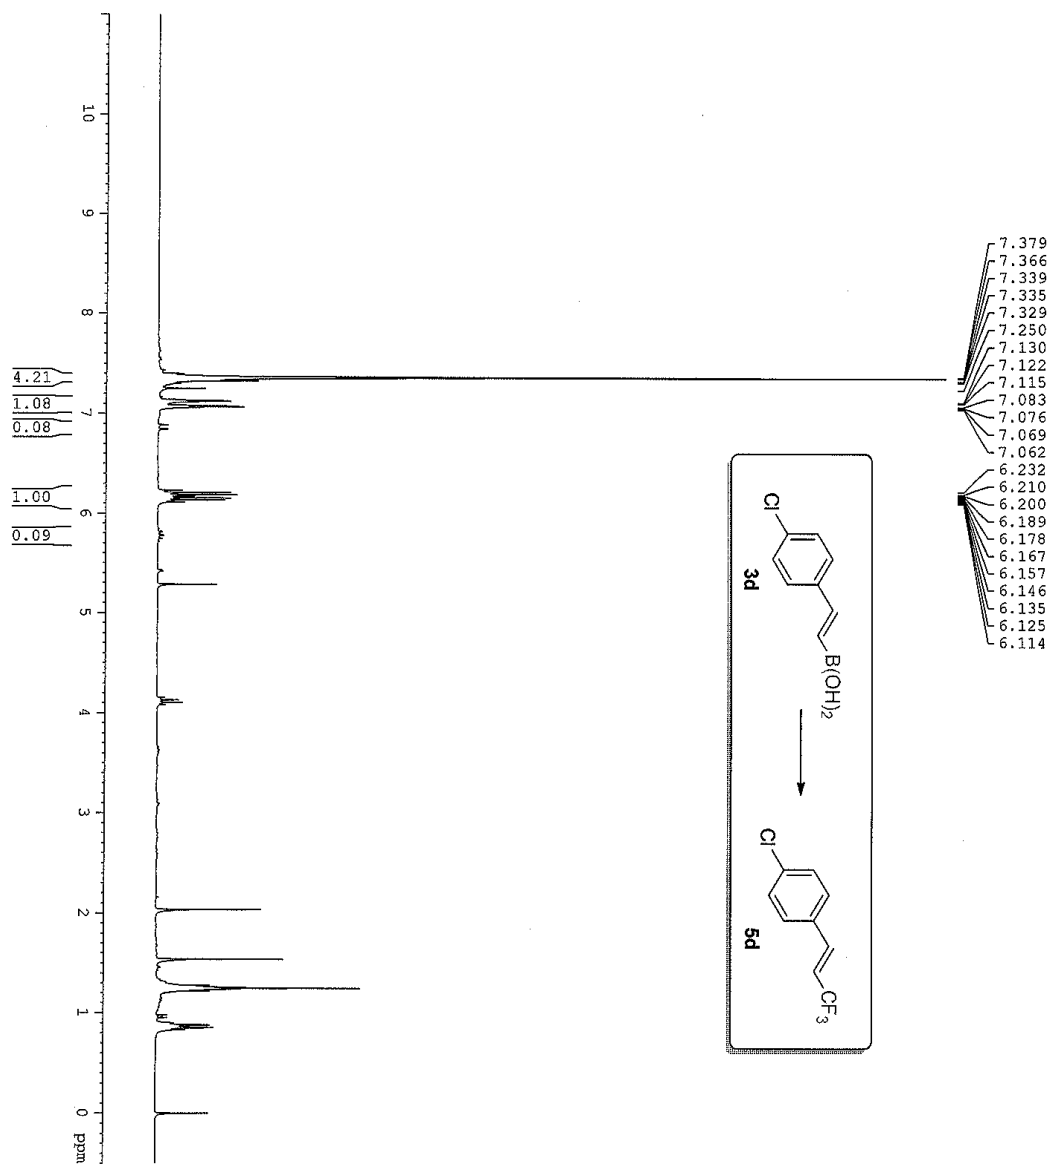

$^{19}\text{F}$  NMR of isolated 5d in  $\text{CDCl}_3$

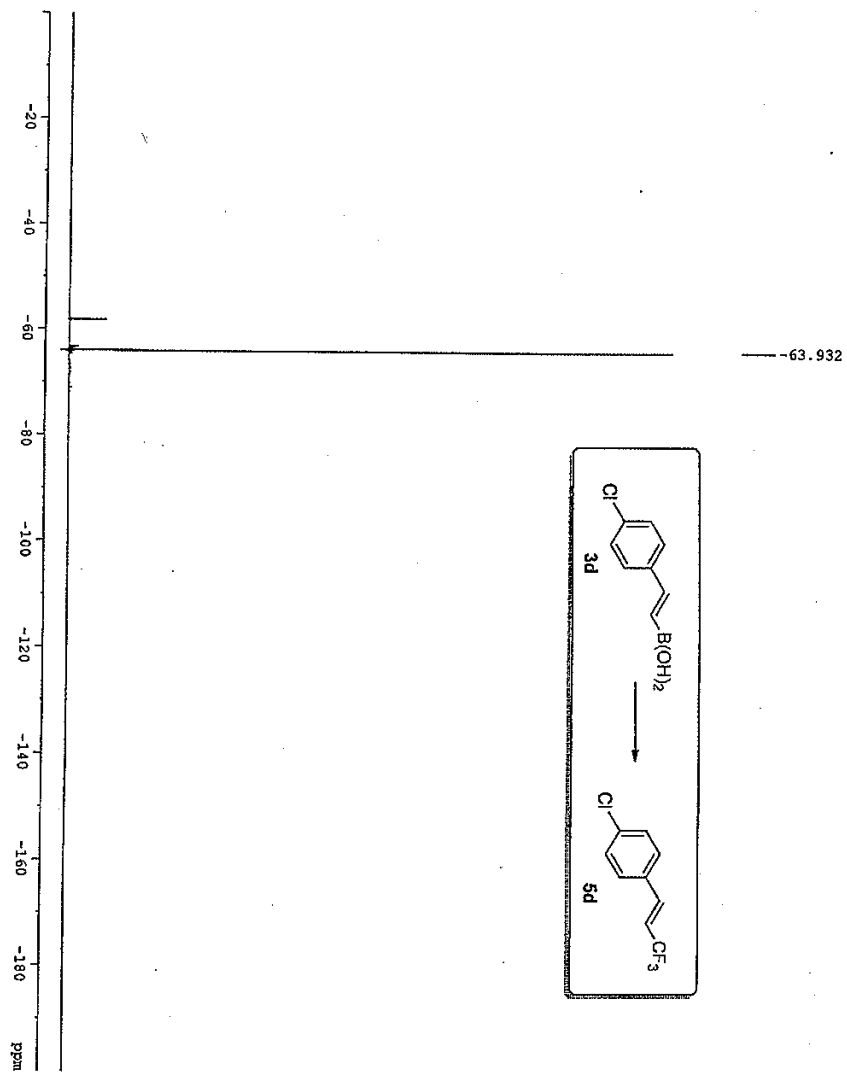

## GC-MS of crude 5d

Analysis : GC-MS  
Instrument : Shimadzu GC-2010  
Analyzed by : Admit  
Analyzed : 8/30/2013 2:16:48 PM  
Sample Type : Unknown  
Level # :  
Sample Name : GC-RIS-F-69  
Sample ID : GC-RIS-F-69  
Injection : 11-1  
Sample Amount : 1  
Dilution Factor : 1  
Val # : 3  
Injection Volume : 5

Sample Information

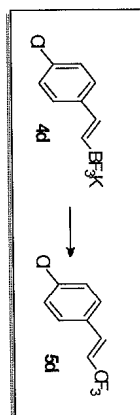

Spectrum

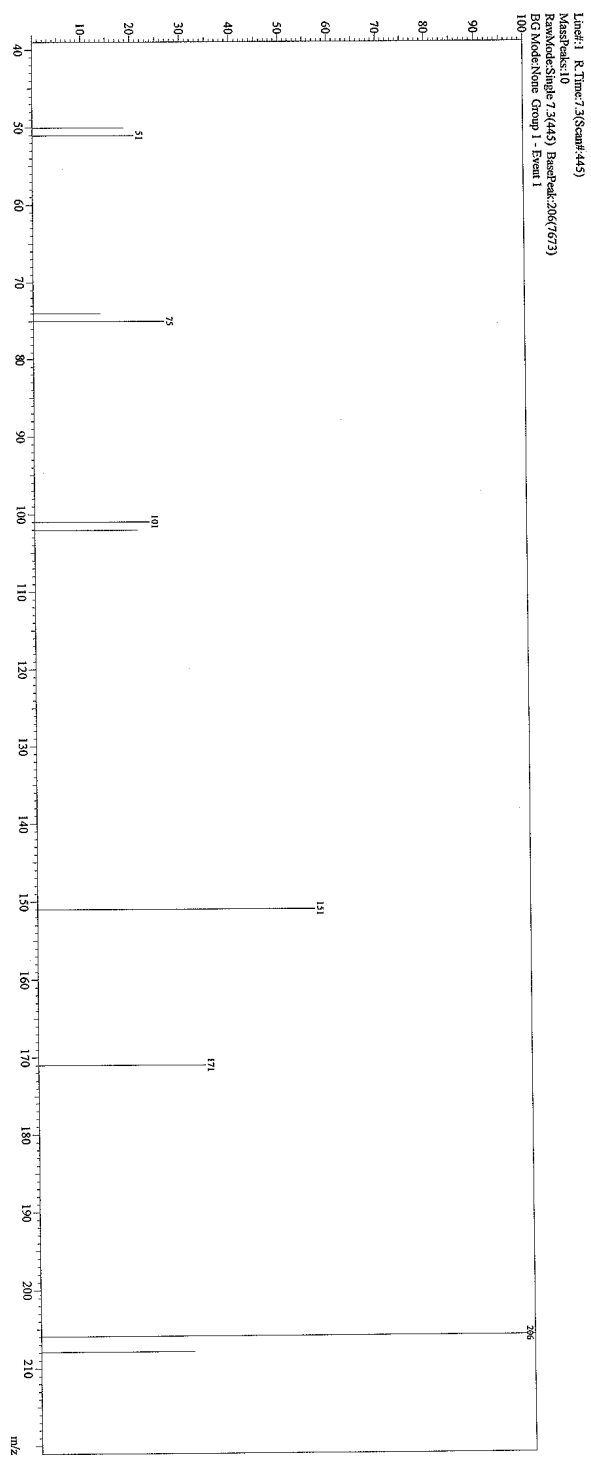

**$^{19}\text{F}$  NMR of crude 5d in  $\text{CDCl}_3$**

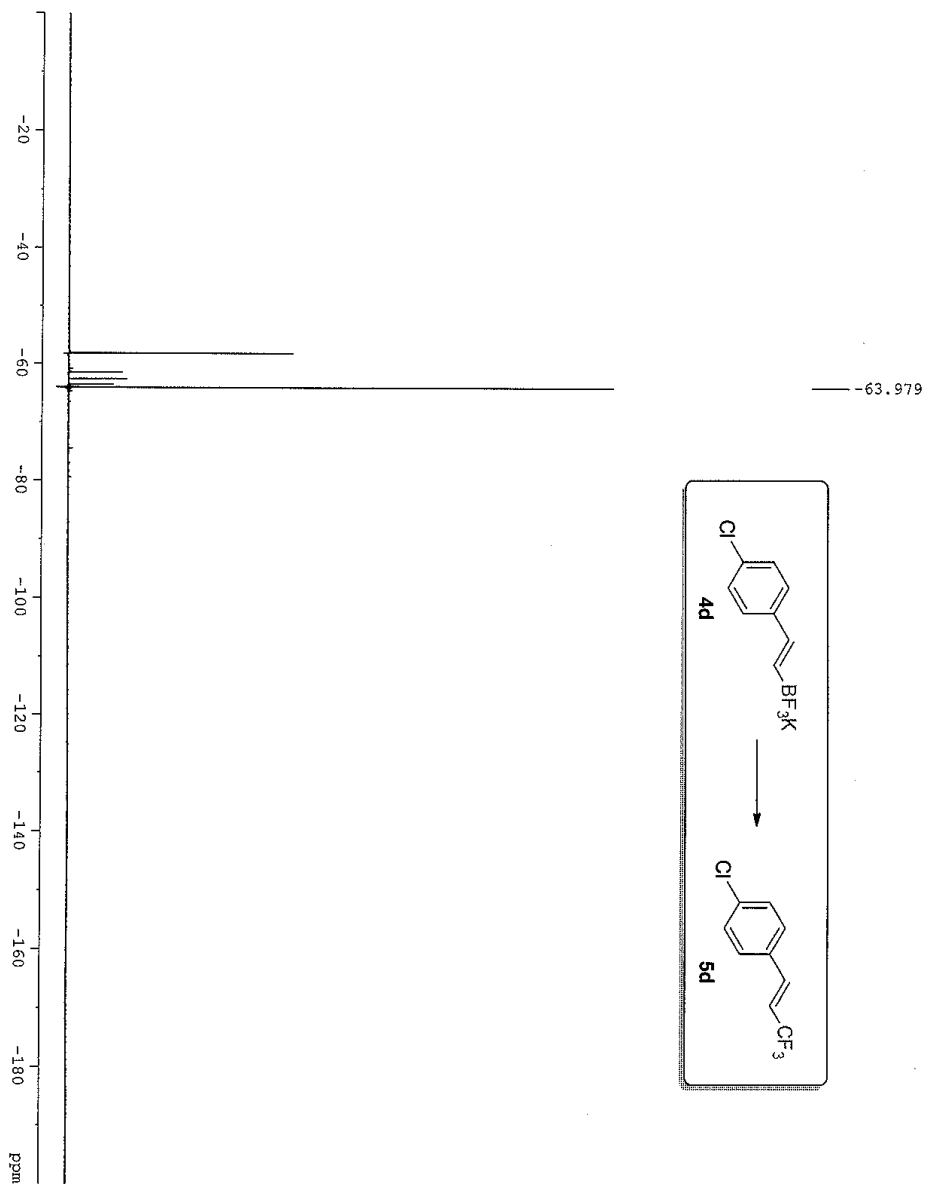



$^{19}\text{F}$  NMR yield of compound 5d  $(2.22/(1 \times 3)) \times 100\% = 74\%$  in  $\text{CDCl}_3$

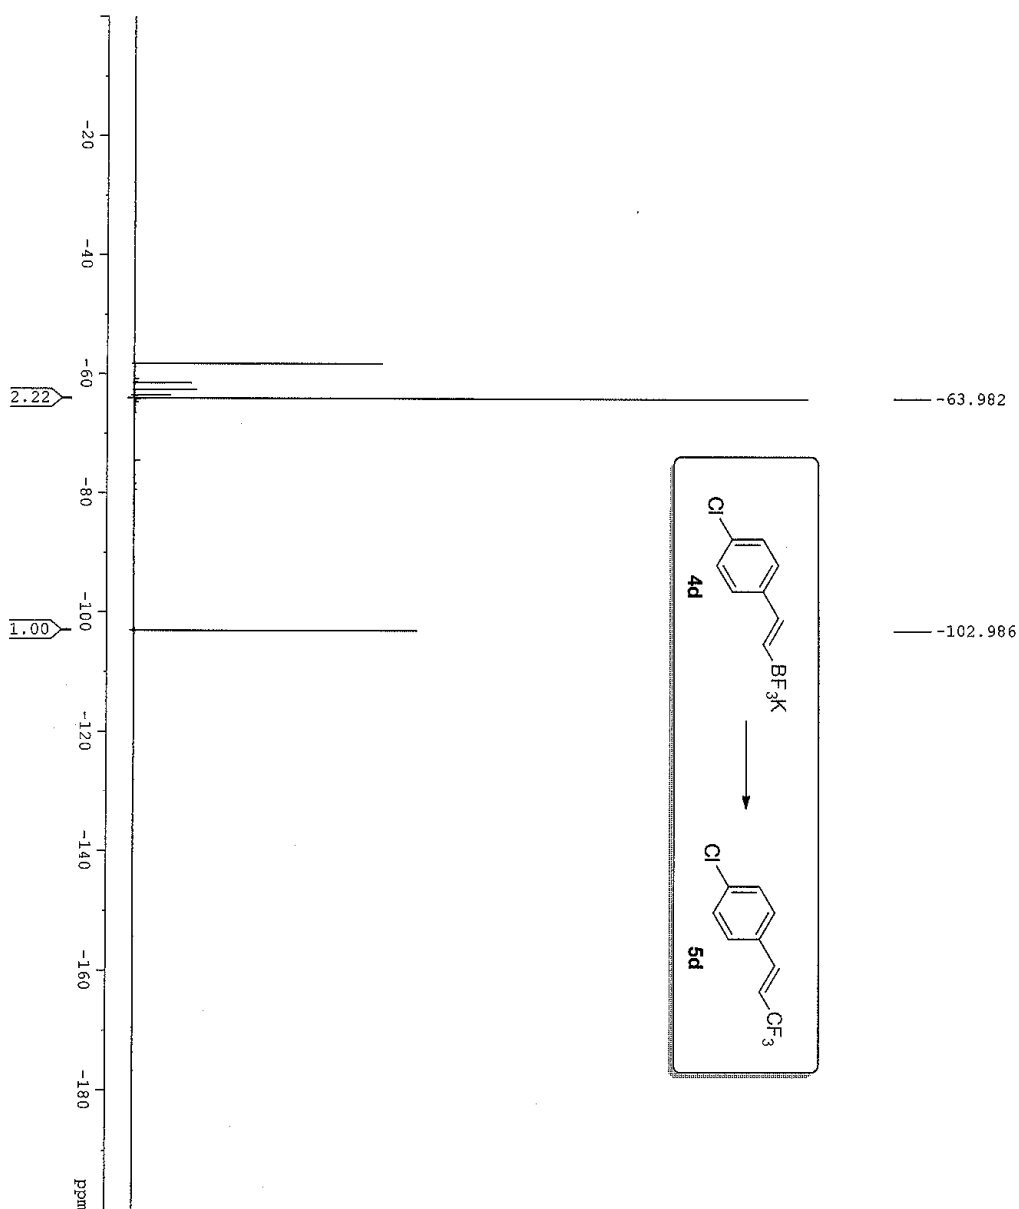

Supplement: c3ra46837b.pdf [file c3ra46837b.pdf]
